# Supplementary material for: Comprehensive analysis of ceRNA network of ERCC4 in colorectal cancer
Source: PeerJ. 2021 Dec 14;9:e12647. doi: 10.7717/peerj.12647 (PMC8679902; doi:10.7717/peerj.12647)
Supplement: Supplemental Information 1 [file peerj-09-12647-s001.xlsx]

## Sheet: ERCC4
Table S1. Pathological parameters of ERCC4
Variables	Cases	low	high	P
		n(%)	n(%)
Gender
Male	38	22(57.89)	16(42.11)
Female	29	12(41.38)	17(58.62)	0.18
Age (years)
≤60	28	16(57.14)	12(42.86)
＞60	39	18(46.15)	21(53.85)	0.375
Invasive depth
T1-2	17	5(29.41)	12(70.59)
T3-4	50	29(58)	21(42)	0.042
Lymph node metastasis
Negative	33	19(57.58)	14(42.42)
Positive	34	15(44.12)	19(55.88)	0.271
Distant metastasis
Negative	66	34(51.52)	32(48.48)
Positive	1	0(0)	1(100)	0.306
Tumor location
Colon	20	10(50)	10(50)
Rectum	47	24(51.06)	23(48.94)	0.936
Maximum diameter (cm)
≤4	24	10(41.67)	14(58.33)
＞4	43	24(55.81)	19(44.19)	0.267
Bormann type
Ⅰ	12	5(41.67)	7(58.33)
Ⅱ	22	12(54.55)	10(45.45)
Ⅲ	30	16(53.33)	14(46.67)
Ⅳ	3	1(33.33)	2(66.67)	0.809
Differentiation degree
Well/moderate	43	24(55.81)	19(44.19)
Poor/mucinous	24	10(41.67)	14(58.33)	0.267
Growth pattern
Cloddy/nested	32	17(53.12)	15(46.88)
Infiltrative	35	17(48.57)	18(51.43)	0.71
Lymphocytic infiltration
Negative	24	11(45.83)	13(54.17)
Positive	22	14(63.64)	8(36.36)	0.226
Vessel carcinoma embolus
Negative	52	25(48.08)	27(51.92)
Positive	15	9(60)	6(40)	0.416

## Sheet: miR-200c
Table S2. Pathological parameters of miR-200c
Variables	Cases	low	high	P
		n(%)	n (%)
Gender
Male	38	20(52.63)	18(47.37)
Female	29	13(44.83)	16(55.17)	0.527
Age (years)
≤60	28	14(50)	14(50)
＞60	39	19(48.72)	20(51.28)	0.918
Invasive depth
T1-2	17	7(41.18)	10(58.82)
T3-4	50	26(52)	24(48)	0.441
Lymph node metastasis
Negative	33	17(51.52)	16(48.48)
Positive	34	16(47.06)	18(52.94)	0.715
Distant metastasis
Negative	66	32(48.48)	34(51.522)
Positive	1	1(100)	0(0)	0.306
Tumor location
Colon	20	8(40)	12(60)
Rectum	47	25(53.19)	22(46.81)	0.323
Maximum diameter (cm)
≤4	24	14(58.33)	10(41.67)
＞4	43	19(44.19)	24(55.81)	0.267
Bormann type
Ⅰ	12	5(41.67)	7(58.33)
Ⅱ	22	11(50)	11(50)
Ⅲ	30	16(53.33)	14(46.67)
Ⅳ	3	1(33.33)	2(66.67)	0.853
Differentiation degree
Well/moderate	43	24(55.81)	19(44.19)
Poor/mucinous	24	9(37.5)	15(62.5)	0.151
Growth pattern
Cloddy/nested	32	18(56.25)	14(43.75)
Infiltrative	35	15(42.86)	20(57.14)	0.273
Lymphocytic infiltration
Negative	24	12(50)	12(50)
Positive	22	11(50)	11(50)	1
Vessel carcinoma embolus
Negative	52	28(53.85)	24(46.15)
Positive	15	5(33.33)	10(66.67)	0.162

## Sheet: MALAT1
Table S3. Pathological parameters of MALAT1
Variables	Cases	low	high	P
		n(%)	n (%)
Gender
Male	38	19(50)	19(50)
Female	29	15(51.72)	14(48.28)	0.889
Age (years)
≤60	28	12(42.86)	16(57.14)
＞60	39	22(56.41)	17(43.59)	0.274
Invasive depth
T1-2	17	6(35.29)	11(64.71)
T3-4	50	28(56)	22(44)	0.14
Lymph node metastasis
Negative	33	15(45.45)	18(54.55)
Positive	34	19(55.88)	15(44.12)	0.393
Distant metastasis
Negative	66	34(51.52)	32(48.48)
Positive	1	0(0)	1(100)	0.306
Tumor location
Colon	20	11(55)	9(45)
Rectum	47	23(48.94)	24(51.06)	0.65
Maximum diameter (cm)
≤4	24	11(45.83)	13(54.17)
＞4	43	23(53.49)	20(46.51)	0.548
Bormann type
Ⅰ	12	7(58.33)	5(41.67)
Ⅱ	22	8(36.36)	14(63.64)
Ⅲ	30	17(56.67)	13(43.33)
Ⅳ	3	2(66.67)	1(33.33)	0.42
Differentiation degree
Well/moderate	43	22(51.16)	21(48.84)
Poor/mucinous	24	12(50)	12(50)	0.927
Growth pattern
Cloddy/nested	32	17(53.12)	15(46.88)
Infiltrative	35	17(48.57)	18(51.43)	0.71
Lymphocytic infiltration
Negative	24	12(50)	12(50)
Positive	22	14(63.64)	8(36.36)	0.351
Vessel carcinoma embolus
Negative	52	26(50)	26(50)
Positive	15	8(53.33)	7(46.67)	0.82
