# Supplementary material for: Comprehensive analysis of ceRNA network of ERCC4 in colorectal cancer
Source: PeerJ. 2021 Dec 14;9:e12647. doi: 10.7717/peerj.12647 (PMC8679902; doi:10.7717/peerj.12647)
Supplement: Supplemental Information 2 [file peerj-09-12647-s002.xlsx]

## Sheet: DEmiRNA
gene_name	gene_id	gene_biotype	baseMean	log2FoldChange	lfcSE	stat	pvalue	padj
MIR8075	ENSG00000277942	miRNA	1.0566	-2.94449	0.389907	-7.55177	4.2938e-14	5.29509e-13
MIR4449	ENSG00000264585	miRNA	1.35046	-2.27161	0.274797	-8.26649	1.37958e-16	2.32951e-15
MIR4737	ENSG00000264049	miRNA	5.96442	-1.99034	0.166244	-11.9724	4.95586e-33	5.92054e-31
MIR6858	ENSG00000276350	miRNA	0.467376	-1.4941	0.322242	-4.63657	3.54237e-06	1.52915e-05
MIR6807	ENSG00000275924	miRNA	0.787765	-1.43446	0.247638	-5.79257	6.93188e-09	4.39168e-08
MIR4665	ENSG00000263575	miRNA	0.770303	-1.3996	0.268735	-5.2081	1.90789e-07	9.88301e-07
MIR3661	ENSG00000266751	miRNA	1.10287	-1.26968	0.306612	-4.141	3.45799e-05	0.000127577
AL928646.1	ENSG00000275110	miRNA	0.488273	-1.24551	0.465361	-2.67643	0.0074411	0.0173296
MIR548I2	ENSG00000221275	miRNA	1.32577	-1.11138	0.197609	-5.62415	1.86428e-08	1.1176e-07
MIR210	ENSG00000199038	miRNA	3.63692	-1.09559	0.150742	-7.26797	3.64941e-13	3.99866e-12
MIR6891	ENSG00000277402	miRNA	0.994263	-1.08584	0.233971	-4.64094	3.46835e-06	1.4999e-05
MIR324	ENSG00000199053	miRNA	4.17155	-1.0685	0.152115	-7.02431	2.15132e-12	2.13896e-11
MIR27A	ENSG00000207808	miRNA	2.50493	-1.06807	0.16784	-6.36358	1.97103e-10	1.53121e-09
MIR6777	ENSG00000274111	miRNA	0.426872	-1.00455	0.373994	-2.68601	0.0072311	0.0168837
MIR141	ENSG00000207708	miRNA	0.46573	-0.988748	0.222325	-4.44731	8.69505e-06	3.53733e-05
MIR203A	ENSG00000207568	miRNA	0.667279	-0.972113	0.240722	-4.03833	5.3834e-05	0.000191658
MIR328	ENSG00000207948	miRNA	0.342944	-0.952983	0.30791	-3.095	0.0019681	0.00522199
MIR4754	ENSG00000266640	miRNA	1.36381	-0.930351	0.181225	-5.13368	2.84125e-07	1.4396e-06
MIR6784	ENSG00000277249	miRNA	2.37469	-0.890803	0.124783	-7.13883	9.41315e-13	9.79731e-12
MIR3183	ENSG00000264429	miRNA	0.492862	-0.874994	0.253288	-3.45455	0.000551222	0.00162912
MIR4728	ENSG00000265178	miRNA	1.84154	-0.803184	0.169233	-4.74603	2.07448e-06	9.26897e-06
MIR4767	ENSG00000264268	miRNA	1.01827	-0.79883	0.205929	-3.87916	0.000104816	0.000354103
MIR4768	ENSG00000265465	miRNA	2.57812	-0.784414	0.188861	-4.1534	3.2757e-05	0.000121426
MIR33B	ENSG00000207839	miRNA	0.400184	-0.782273	0.231574	-3.37808	0.000729946	0.00210987
MIR6812	ENSG00000273555	miRNA	1.8583	-0.765294	0.148777	-5.14389	2.69107e-07	1.36768e-06
MIR6859-1	ENSG00000278267	miRNA	2.30705	-0.74809	0.14909	-5.0177	5.22939e-07	2.55188e-06
MIR3609	ENSG00000266019	miRNA	0.538655	-0.723186	0.245685	-2.94354	0.00324477	0.00822249
MIR4479	ENSG00000266507	miRNA	0.455131	-0.721033	0.2429	-2.96844	0.00299316	0.00764673
MIR6829	ENSG00000276489	miRNA	1.56913	-0.71505	0.178041	-4.01621	5.91414e-05	0.000208996
MIR548AA2	ENSG00000207688	miRNA	0.421105	-0.693434	0.213803	-3.24333	0.00118141	0.00328324
MIR7111	ENSG00000276712	miRNA	5.81743	-0.681797	0.0995528	-6.8486	7.45768e-12	6.98603e-11
MIR6871	ENSG00000276169	miRNA	0.29644	-0.656162	0.27668	-2.37156	0.0177133	0.0374226
MIR4740	ENSG00000266392	miRNA	2.63802	-0.643809	0.13022	-4.94402	7.65287e-07	3.64881e-06
MIR6124	ENSG00000275373	miRNA	0.39972	-0.638702	0.219696	-2.9072	0.00364678	0.00912985
MIR4672	ENSG00000263979	miRNA	0.268004	-0.607258	0.25477	-2.38355	0.0171463	0.036361
MIR6851	ENSG00000275651	miRNA	0.379241	-0.58489	0.238802	-2.44927	0.0143147	0.0310066
MIR200C	ENSG00000207713	miRNA	0.483358	-0.579079	0.211461	-2.73847	0.00617265	0.0146486
MIR6750	ENSG00000274986	miRNA	0.613607	-0.569433	0.203071	-2.8041	0.0050457	0.012251
MIR6761	ENSG00000274697	miRNA	0.380072	-0.565026	0.212116	-2.66376	0.00772732	0.0179285
MIR3177	ENSG00000265820	miRNA	0.383503	-0.562615	0.232504	-2.41981	0.0155288	0.0332969
MIR6804	ENSG00000275519	miRNA	0.377731	-0.554228	0.188286	-2.94355	0.00324474	0.00822249
MIR6730	ENSG00000276830	miRNA	0.83626	-0.547655	0.163434	-3.35093	0.000805398	0.00231031
MIR200A	ENSG00000207607	miRNA	12.3973	-0.545681	0.121686	-4.48433	7.31449e-06	3.00964e-05
MIR6867	ENSG00000274621	miRNA	1.34858	-0.53808	0.16138	-3.33423	0.000855347	0.00244314
MIR193A	ENSG00000207614	miRNA	0.463396	-0.526716	0.203978	-2.58222	0.00981671	0.0221576
MIR6793	ENSG00000275640	miRNA	0.600556	-0.522147	0.177189	-2.94684	0.00321039	0.00814939
MIR200B	ENSG00000207730	miRNA	8.21524	-0.520624	0.127071	-4.0971	4.18359e-05	0.000151856
MIR1268A	ENSG00000221641	miRNA	0.776548	-0.510241	0.165221	-3.08823	0.00201354	0.00533163
MIR4525	ENSG00000266107	miRNA	0.318134	-0.506577	0.207737	-2.43855	0.0147465	0.031814
MIR4730	ENSG00000264961	miRNA	0.459955	-0.49719	0.18757	-2.65069	0.00803286	0.0185541
MIR4641	ENSG00000266494	miRNA	0.546783	-0.491576	0.193717	-2.5376	0.0111616	0.0248109
MIR6814	ENSG00000275166	miRNA	0.354018	-0.484294	0.212151	-2.28278	0.0224432	0.0460167
MIR4648	ENSG00000264357	miRNA	1.03093	-0.477362	0.163689	-2.91627	0.00354247	0.00889647
MIR574	ENSG00000207944	miRNA	0.375334	-0.454581	0.197423	-2.30257	0.0213029	0.0439641
MIR429	ENSG00000198976	miRNA	34.9119	-0.432365	0.0968668	-4.4635	8.06304e-06	3.29494e-05
MIR23A	ENSG00000207980	miRNA	1.54625	-0.411065	0.16655	-2.46811	0.0135828	0.0296126
MIR25	ENSG00000207547	miRNA	15.5217	-0.308217	0.0854064	-3.60883	0.000307579	0.000952333
MIR135A1	ENSG00000207926	miRNA	10.9017	-0.23546	0.0774351	-3.04074	0.00236	0.00615881
MIR589	ENSG00000207973	miRNA	3.10296	-0.22423	0.0906124	-2.47461	0.0133382	0.0291308
MIR647	ENSG00000207554	miRNA	32.5932	-0.218998	0.0907023	-2.41447	0.0157581	0.0337111
MIR3936	ENSG00000263597	miRNA	6.51983	-0.186833	0.075548	-2.47304	0.0133969	0.0292423
MIR3125	ENSG00000264370	miRNA	0.400406	0.502973	0.213127	2.35997	0.0182765	0.0384339
MIR4420	ENSG00000264773	miRNA	0.441503	0.505242	0.223865	2.25691	0.0240138	0.0488024
MIR3939	ENSG00000265828	miRNA	0.694647	0.513263	0.186155	2.75718	0.0058303	0.0139174
MIR186	ENSG00000207721	miRNA	3.91632	0.695098	0.12184	5.70502	1.16331e-08	7.16026e-08
MIR4477B	ENSG00000266017	miRNA	1.07281	0.774672	0.186753	4.14812	3.35223e-05	0.000124035
MIR8071-1	ENSG00000274172	miRNA	1.17562	0.783696	0.233429	3.35732	0.000787008	0.00226232
MIR8071-2	ENSG00000277030	miRNA	2.62395	0.810421	0.18948	4.27708	1.89364e-05	7.28142e-05

## Sheet: DElncRNA
gene_name	gene_id	gene_biotype	baseMean	log2FoldChange	lfcSE	stat	pvalue	padj
DLEU2L	ENSG00000116652	lncRNA	6.44107	0.562404	0.0887938	6.33383	2.39156e-10	1.83514e-09
H19	ENSG00000130600	lncRNA	1964.34	-0.51781	0.181206	-2.85758	0.00426885	0.0105307
AL139352.1	ENSG00000132832	lncRNA	11.6313	-0.363735	0.154387	-2.356	0.0184729	0.0387997
CCDC39	ENSG00000145075	lncRNA	36.9624	0.684354	0.0781342	8.7587	1.9751e-18	4.17162e-17
LINC01558	ENSG00000146521	lncRNA	114.421	-0.365089	0.111432	-3.27633	0.00105166	0.00295182
AL136982.1	ENSG00000151303	lncRNA	1.25469	-0.351589	0.148843	-2.36214	0.0181698	0.0382517
SNHG16	ENSG00000163597	lncRNA	935.695	-0.150349	0.0401502	-3.74465	0.000180643	0.000584642
IGF2BP2-AS1	ENSG00000163915	lncRNA	3.05132	-0.297324	0.126278	-2.35452	0.0185465	0.0389355
AL357033.1	ENSG00000167046	lncRNA	29.1225	-0.638229	0.118041	-5.40682	6.41521e-08	3.57191e-07
TPT1-AS1	ENSG00000170919	lncRNA	385.416	-0.223994	0.0702006	-3.19077	0.00141894	0.00387766
MIR31HG	ENSG00000171889	lncRNA	6.37902	-0.587099	0.218292	-2.68952	0.00715552	0.0167236
AC020659.1	ENSG00000174171	lncRNA	84.8491	-0.451486	0.153807	-2.93541	0.00333104	0.00842379
DIRC1	ENSG00000174325	lncRNA	2.3256	0.745732	0.175821	4.24144	2.22093e-05	8.44565e-05
SNHG11	ENSG00000174365	lncRNA	503.983	-0.280856	0.0581005	-4.83396	1.33844e-06	6.15063e-06
MIR1-1HG-AS1	ENSG00000174403	lncRNA	8.94361	0.884726	0.159173	5.55827	2.72455e-08	1.59869e-07
SNHG29	ENSG00000175061	lncRNA	12956.6	-0.400102	0.0625312	-6.39844	1.56973e-10	1.23465e-09
AC007601.1	ENSG00000175604	lncRNA	1.05305	-0.44707	0.179399	-2.49204	0.012701	0.0278602
LINC00476	ENSG00000175611	lncRNA	119.636	-0.136302	0.0547079	-2.49145	0.0127222	0.0279018
LINC02873	ENSG00000175728	lncRNA	0.659681	-0.813215	0.262336	-3.09989	0.00193591	0.00514479
C15orf54	ENSG00000175746	lncRNA	1.69996	0.558786	0.139906	3.99401	6.49642e-05	0.00022772
ZBTB44-DT	ENSG00000175773	lncRNA	10.5653	-0.30711	0.0815232	-3.76715	0.000165123	0.000538516
AL138899.1	ENSG00000176320	lncRNA	0.702914	0.882774	0.169621	5.20438	1.94644e-07	1.00677e-06
C20orf197	ENSG00000176659	lncRNA	1.99496	0.858199	0.141488	6.06555	1.31505e-09	9.16224e-09
TYMSOS	ENSG00000176912	lncRNA	57.5224	-0.505856	0.0929483	-5.44233	5.25874e-08	2.96339e-07
AP000679.1	ENSG00000176984	lncRNA	1.96163	-0.614611	0.128461	-4.7844	1.71496e-06	7.75413e-06
PRDM16-DT	ENSG00000177133	lncRNA	17.3423	-0.532133	0.142527	-3.73355	0.0001888	0.000608719
DLGAP1-AS1	ENSG00000177337	lncRNA	223.292	-0.222071	0.0602665	-3.68482	0.000228868	0.000726152
ZFAS1	ENSG00000177410	lncRNA	4729.61	-0.383271	0.0665481	-5.75931	8.44566e-09	5.29554e-08
LINC00324	ENSG00000178977	lncRNA	85.2457	-0.327416	0.0675539	-4.84674	1.25504e-06	5.79457e-06
LINC00174	ENSG00000179406	lncRNA	217.533	-0.17195	0.0721675	-2.38265	0.0171887	0.0364311
LINC02870	ENSG00000180066	lncRNA	27.6473	-0.337545	0.105097	-3.21176	0.00131927	0.00363202
AC022148.1	ENSG00000180458	lncRNA	1.48929	0.550038	0.179464	3.06489	0.00217752	0.00572442
PRR26	ENSG00000180525	lncRNA	247.955	-0.265453	0.0641172	-4.14013	3.47115e-05	0.000128019
LINC02878	ENSG00000181097	lncRNA	23.1914	-0.450103	0.0836692	-5.37956	7.46675e-08	4.1184e-07
TP53TG1	ENSG00000182165	lncRNA	394.425	-0.255479	0.0640051	-3.99153	6.56471e-05	0.000229945
FAM87A	ENSG00000182366	lncRNA	7.60857	-0.289135	0.122967	-2.35133	0.0187064	0.039227
AC138028.1	ENSG00000182376	lncRNA	2.61409	-0.53003	0.144103	-3.67814	0.000234941	0.000743198
LINC01006	ENSG00000182648	lncRNA	417.747	-0.350747	0.077173	-4.54495	5.4949e-06	2.30309e-05
PRKCZ-AS1	ENSG00000182873	lncRNA	74.2193	-0.41296	0.0706065	-5.84876	4.95265e-09	3.19876e-08
TSPEAR-AS2	ENSG00000182912	lncRNA	31.4539	-0.391616	0.142904	-2.74041	0.00613623	0.0145694
LINC01547	ENSG00000183250	lncRNA	42.0276	-0.196934	0.0698808	-2.81814	0.00483029	0.0117819
AC005037.1	ENSG00000183308	lncRNA	10.071	-0.281452	0.0735746	-3.82539	0.000130564	0.000433613
AP001062.1	ENSG00000184441	lncRNA	68.0696	-0.327121	0.0688301	-4.75258	2.00833e-06	8.99759e-06
LINC00482	ENSG00000185168	lncRNA	49.2006	-0.585863	0.117983	-4.96567	6.84643e-07	3.28356e-06
TMEM105	ENSG00000185332	lncRNA	72.154	-0.501246	0.086087	-5.82256	5.79542e-09	3.71484e-08
HDHD5-AS1	ENSG00000185837	lncRNA	6.923	-0.646213	0.0970978	-6.65528	2.82763e-11	2.45453e-10
MATN1-AS1	ENSG00000186056	lncRNA	52.7303	-0.187502	0.0612967	-3.05893	0.00222129	0.00582745
LINC02875	ENSG00000187013	lncRNA	10.4548	-0.477662	0.112154	-4.25897	2.05372e-05	7.85196e-05
PP7080	ENSG00000188242	lncRNA	1131.12	-0.321886	0.0883058	-3.64513	0.000267258	0.000837665
AC092171.1	ENSG00000188365	lncRNA	7.40511	-0.331023	0.084901	-3.89893	9.66196e-05	0.000328122
RNF216P1	ENSG00000196204	lncRNA	489.374	-0.0986975	0.0346799	-2.84595	0.00442785	0.0108787
C9orf163	ENSG00000196366	lncRNA	25.531	-0.491769	0.0868243	-5.66396	1.47918e-08	8.98866e-08
LINC00173	ENSG00000196668	lncRNA	16.5079	-0.623972	0.126514	-4.93202	8.13821e-07	3.86095e-06
SNHG17	ENSG00000196756	lncRNA	1822.28	-0.455206	0.070696	-6.43892	1.20324e-10	9.61311e-10
GPRACR	ENSG00000196979	lncRNA	1.355	0.785538	0.203961	3.85142	0.000117437	0.000392885
CH17-340M24.3	ENSG00000197180	lncRNA	91.5489	-0.204692	0.0661327	-3.09517	0.001967	0.00522019
MIRLET7BHG	ENSG00000197182	lncRNA	79.144	-0.545004	0.0823271	-6.61998	3.59255e-11	3.08005e-10
LINC00336	ENSG00000197251	lncRNA	7.74582	-0.346094	0.115562	-2.99487	0.00274564	0.00706347
HMGA2-AS1	ENSG00000197301	lncRNA	19.1135	0.699614	0.124164	5.63461	1.75455e-08	1.0548e-07
C14orf178	ENSG00000197734	lncRNA	0.551292	-0.490335	0.178681	-2.7442	0.00606594	0.0144213
SNHG12	ENSG00000197989	lncRNA	524.843	-0.372109	0.0546251	-6.81205	9.62152e-12	8.89746e-11
DSCR8	ENSG00000198054	lncRNA	2.72571	1.41169	0.614599	2.29692	0.0216234	0.0445363
AFDN-DT	ENSG00000198221	lncRNA	61.7466	-0.207635	0.0729487	-2.84631	0.00442289	0.0108682
AL354714.1	ENSG00000198358	lncRNA	1.13237	-0.966331	0.273108	-3.53827	0.00040276	0.00122228
NBR2	ENSG00000198496	lncRNA	203.575	-0.182953	0.0525242	-3.48321	0.000495434	0.00147968
C3orf35	ENSG00000198590	lncRNA	20.4296	-0.358296	0.0721293	-4.96742	6.78497e-07	3.25735e-06
AC013549.1	ENSG00000203258	lncRNA	0.485471	-0.950855	0.226924	-4.1902	2.78711e-05	0.000104388
TDRKH-AS1	ENSG00000203288	lncRNA	25.3446	-0.175181	0.0749175	-2.33831	0.019371	0.040431
AL445248.1	ENSG00000203325	lncRNA	1.75473	-0.406699	0.111415	-3.65032	0.000261917	0.00082207
AC004988.1	ENSG00000203446	lncRNA	6.10507	0.626981	0.140365	4.4668	7.93976e-06	3.24943e-05
PDCD4-AS1	ENSG00000203497	lncRNA	43.7998	-0.124456	0.048281	-2.57774	0.00994477	0.0224109
LINC02408	ENSG00000203585	lncRNA	2.53477	0.734502	0.153395	4.7883	1.68199e-06	7.61498e-06
AC005342.1	ENSG00000203593	lncRNA	0.443762	-0.686946	0.219546	-3.12893	0.00175442	0.00470039
LINC00501	ENSG00000203645	lncRNA	25.8251	-0.258917	0.106032	-2.44188	0.014611	0.0315723
IBA57-DT	ENSG00000203684	lncRNA	6.68001	-0.307849	0.103749	-2.96726	0.00300462	0.00767292
BVES-AS1	ENSG00000203808	lncRNA	1.66417	0.561526	0.172465	3.25588	0.00113043	0.00315531
ATP1A1-AS1	ENSG00000203865	lncRNA	78.9259	-0.409973	0.057349	-7.14874	8.75778e-13	9.15508e-12
SNHG5	ENSG00000203875	lncRNA	4251.89	-0.314577	0.0831527	-3.78313	0.00015487	0.000507373
ARRDC1-AS1	ENSG00000203993	lncRNA	317.008	-0.351685	0.0447982	-7.85043	4.14609e-15	5.86606e-14
LINC02520	ENSG00000204110	lncRNA	1.23078	1.50684	0.230152	6.54717	5.86381e-11	4.89984e-10
AL162293.1	ENSG00000204117	lncRNA	0.464803	-0.66832	0.274468	-2.43497	0.0148932	0.0321051
SNHG32	ENSG00000204387	lncRNA	3253.91	-0.419215	0.0519724	-8.0661	7.25798e-16	1.11881e-14
AC115618.1	ENSG00000204620	lncRNA	19.7683	-0.209987	0.0600953	-3.49424	0.000475406	0.00142454
AC010624.1	ENSG00000204666	lncRNA	2.42128	0.557223	0.187921	2.9652	0.00302491	0.00772061
ST8SIA6-AS1	ENSG00000204832	lncRNA	11.1065	0.578784	0.229783	2.51883	0.0117746	0.0260372
FAM83A-AS1	ENSG00000204949	lncRNA	2.54547	-0.41316	0.179082	-2.3071	0.0210495	0.0434855
BLACE	ENSG00000204960	lncRNA	0.348784	-0.642692	0.276942	-2.32067	0.0203046	0.0421335
AC134312.1	ENSG00000205037	lncRNA	2.76152	0.812625	0.163088	4.98274	6.26917e-07	3.02377e-06
LINC02397	ENSG00000205056	lncRNA	3.55352	1.16213	0.171655	6.77013	1.28663e-11	1.17139e-10
LINC00654	ENSG00000205181	lncRNA	225.744	0.663982	0.118522	5.60219	2.11665e-08	1.25941e-07
CHKB-DT	ENSG00000205559	lncRNA	23.2873	-0.386615	0.0757599	-5.10317	3.34014e-07	1.6766e-06
AL049775.1	ENSG00000205562	lncRNA	1.57128	0.819099	0.172352	4.75249	2.00925e-06	9.00066e-06
LINC01597	ENSG00000205611	lncRNA	9.09389	0.52065	0.174165	2.98941	0.00279515	0.00717634
AP001042.1	ENSG00000205622	lncRNA	136.333	-0.422386	0.132482	-3.18825	0.00143137	0.00390913
LINC01446	ENSG00000205628	lncRNA	1.65757	1.26099	0.553176	2.27955	0.0226341	0.046356
DPP9-AS1	ENSG00000205790	lncRNA	10.8922	-0.275983	0.0804427	-3.4308	0.000601793	0.00176694
PCOTH	ENSG00000205861	lncRNA	13.9364	-0.344354	0.0869075	-3.9623	7.42305e-05	0.000257673
AC022007.1	ENSG00000206567	lncRNA	55.8109	-0.162553	0.0557625	-2.9151	0.0035558	0.00892663
LINC01089	ENSG00000212694	lncRNA	245.439	-0.295524	0.0692048	-4.27028	1.95231e-05	7.49046e-05
AC016747.1	ENSG00000212978	lncRNA	32.7491	0.572647	0.0788207	7.26518	3.72533e-13	4.07484e-12
LIPE-AS1	ENSG00000213904	lncRNA	45.1843	-0.678393	0.0731163	-9.27828	1.72229e-20	4.71306e-19
LINC00887	ENSG00000214145	lncRNA	4.31848	-0.391395	0.137905	-2.83814	0.00453774	0.0111208
APTR	ENSG00000214293	lncRNA	384.312	-0.141706	0.044038	-3.21782	0.00129167	0.00356349
VAC14-AS1	ENSG00000214353	lncRNA	19.9031	-0.22974	0.094689	-2.42626	0.0152554	0.0327823
LINC00488	ENSG00000214381	lncRNA	1.71178	-0.622901	0.210464	-2.95965	0.00307984	0.00784719
KANSL1-AS1	ENSG00000214401	lncRNA	72.2682	-0.385334	0.0951924	-4.04794	5.16694e-05	0.000184657
AC087491.1	ENSG00000214546	lncRNA	45.037	-0.589839	0.089277	-6.60684	3.92621e-11	3.3481e-10
AC019077.1	ENSG00000214559	lncRNA	2.11512	-0.498791	0.109891	-4.53894	5.65364e-06	2.36557e-05
AC073592.1	ENSG00000214650	lncRNA	3.09048	-0.399937	0.106536	-3.754	0.000174038	0.000565563
AC116407.1	ENSG00000214708	lncRNA	15.3084	-0.422217	0.0877151	-4.8135	1.48308e-06	6.77059e-06
AP002358.1	ENSG00000214797	lncRNA	1.19214	0.833698	0.216897	3.84375	0.000121167	0.000404691
AC104472.1	ENSG00000214919	lncRNA	2.44609	-0.381899	0.110544	-3.45473	0.000550852	0.00162815
CD27-AS1	ENSG00000215039	lncRNA	484.362	-0.177605	0.0486373	-3.65161	0.000260598	0.000818267
BASP1-AS1	ENSG00000215196	lncRNA	1.04712	0.530813	0.179985	2.94921	0.00318586	0.00809036
LINC02649	ENSG00000215244	lncRNA	10.3641	-0.236764	0.0853287	-2.77473	0.00552474	0.0132733
MIR99AHG	ENSG00000215386	lncRNA	13.4291	0.820805	0.12784	6.42057	1.35768e-10	1.07749e-09
LINC00189	ENSG00000215533	lncRNA	1.75754	0.786168	0.141232	5.5665	2.59913e-08	1.52865e-07
AC114730.1	ENSG00000215692	lncRNA	1.58843	-0.47781	0.139877	-3.41592	0.000635664	0.00185828
LINC01356	ENSG00000215866	lncRNA	33.626	-0.374291	0.084497	-4.42963	9.43937e-06	3.81376e-05
AC009403.1	ENSG00000216895	lncRNA	144.108	-0.14906	0.0573105	-2.60092	0.00929729	0.0211111
AC073263.1	ENSG00000217702	lncRNA	2.77947	-0.410153	0.143173	-2.86474	0.0041735	0.0103128
AC110619.1	ENSG00000218416	lncRNA	9.93274	-0.658384	0.163523	-4.02624	5.66751e-05	0.000201005
MIF-AS1	ENSG00000218537	lncRNA	40.4071	-0.335103	0.0882295	-3.79808	0.000145821	0.000479781
ZNF433-AS1	ENSG00000219665	lncRNA	127.773	-0.240355	0.0541232	-4.44089	8.95888e-06	3.63615e-05
IGBP1-AS2	ENSG00000220925	lncRNA	1.89733	-0.862836	0.165736	-5.2061	1.92855e-07	9.98732e-07
ARIH2OS	ENSG00000221883	lncRNA	34.7292	-0.17865	0.0513465	-3.47931	0.000502714	0.00149908
AC106876.1	ENSG00000222001	lncRNA	193.414	-0.239978	0.0839785	-2.85762	0.00426836	0.0105302
HDAC4-AS1	ENSG00000222020	lncRNA	11.6873	-0.553785	0.0839211	-6.59888	4.14279e-11	3.52257e-10
AC112721.2	ENSG00000222032	lncRNA	2.59808	1.0139	0.164295	6.17123	6.77591e-10	4.89579e-09
LINC01124	ENSG00000222033	lncRNA	108.62	-0.286093	0.108989	-2.62498	0.00866534	0.0198423
CYTOR	ENSG00000222041	lncRNA	299.106	-0.164796	0.0675024	-2.44134	0.014633	0.0316135
AC079305.1	ENSG00000222043	lncRNA	4.96774	-0.239111	0.0792502	-3.01717	0.00255151	0.00660879
CLDN10-AS1	ENSG00000223392	lncRNA	8.88002	-0.798191	0.19205	-4.15617	3.23631e-05	0.000120024
AP006748.1	ENSG00000223400	lncRNA	15.5283	-0.42532	0.103048	-4.12738	3.66913e-05	0.000134587
AC004471.1	ENSG00000223461	lncRNA	7.91924	-0.447829	0.0835286	-5.36139	8.25857e-08	4.52641e-07
AL441992.1	ENSG00000223478	lncRNA	55.7702	-0.292462	0.0675313	-4.33076	1.48597e-05	5.8097e-05
AL359094.1	ENSG00000223528	lncRNA	1.54002	-0.458998	0.136879	-3.3533	0.000798532	0.00229285
CCR5AS	ENSG00000223552	lncRNA	46.3792	-0.297012	0.0886134	-3.35177	0.000802971	0.00230422
AC106786.1	ENSG00000223652	lncRNA	6.26537	0.656995	0.123427	5.32293	1.0211e-07	5.51966e-07
AL078459.1	ENSG00000223653	lncRNA	6.28144	-0.487905	0.105946	-4.60521	4.12053e-06	1.76046e-05
LINC01422	ENSG00000223704	lncRNA	4.93952	0.507604	0.114111	4.44832	8.65438e-06	3.52154e-05
AC116609.1	ENSG00000223751	lncRNA	0.774732	0.770171	0.336153	2.29113	0.0219558	0.0451264
AL513217.1	ENSG00000223774	lncRNA	1.03857	0.68563	0.202317	3.38889	0.000701767	0.00203596
LGALS8-AS1	ENSG00000223776	lncRNA	4.53051	-0.215219	0.0930443	-2.31308	0.0207183	0.0428826
LINC01983	ENSG00000223783	lncRNA	1.01414	0.542603	0.236323	2.29603	0.0216744	0.0446295
ENTPD3-AS1	ENSG00000223797	lncRNA	68.657	-0.218004	0.063205	-3.44916	0.000562331	0.001659
LINC01342	ENSG00000223823	lncRNA	24.8765	-0.271203	0.0938393	-2.89008	0.00385143	0.0095861
HRAT92	ENSG00000223855	lncRNA	22.2607	-0.469934	0.117437	-4.00158	6.29199e-05	0.000221427
LGALSL-DT	ENSG00000223935	lncRNA	6.2818	-0.255601	0.0785912	-3.25228	0.00114481	0.00319104
ROR1-AS1	ENSG00000223949	lncRNA	1.40715	0.840723	0.203988	4.12143	3.76527e-05	0.000137823
LINC01767	ENSG00000223956	lncRNA	1.80092	-0.506735	0.135802	-3.73143	0.000190396	0.000613351
CHROMR	ENSG00000223960	lncRNA	84.8991	0.512799	0.0807147	6.35323	2.10838e-10	1.63128e-09
SMCR2	ENSG00000223979	lncRNA	0.864504	-0.380792	0.160691	-2.36972	0.0178016	0.0375802
MIR181A2HG	ENSG00000224020	lncRNA	9.14513	-0.338548	0.109485	-3.09218	0.00198692	0.00526607
EPB41L4A-AS1	ENSG00000224032	lncRNA	644.036	-0.557524	0.0528637	-10.5464	5.27611e-26	2.81311e-24
AC007319.1	ENSG00000224063	lncRNA	1.83092	0.732305	0.173479	4.2213	2.42902e-05	9.1776e-05
AL049795.1	ENSG00000224066	lncRNA	8.14029	-0.325145	0.0901563	-3.60646	0.000310405	0.000960305
SNHG14	ENSG00000224078	lncRNA	340.754	0.504989	0.11781	4.28648	1.81524e-05	7.0018e-05
AC097468.1	ENSG00000224090	lncRNA	8.27701	-0.352199	0.122657	-2.87142	0.00408628	0.0101195
BCAR3-AS1	ENSG00000224093	lncRNA	230.922	-0.262199	0.0551808	-4.75164	2.01778e-06	9.03464e-06
INHBA-AS1	ENSG00000224116	lncRNA	3.91912	0.506244	0.112986	4.48059	7.44369e-06	3.05885e-05
LINC01857	ENSG00000224137	lncRNA	5.652	0.773769	0.137755	5.61698	1.94321e-08	1.16328e-07
LINC02828	ENSG00000224164	lncRNA	0.705273	0.626749	0.187694	3.33921	0.000840168	0.00240294
DNAJC27-AS1	ENSG00000224165	lncRNA	20.6419	-0.40354	0.0668766	-6.0341	1.59855e-09	1.10229e-08
LINC01357	ENSG00000224167	lncRNA	22.7308	-0.340158	0.0944116	-3.60293	0.000314654	0.000972661
LINC00570	ENSG00000224177	lncRNA	8.94421	-0.386581	0.124527	-3.10439	0.00190671	0.00507318
C5orf66	ENSG00000224186	lncRNA	63.6362	-0.414013	0.05812	-7.12342	1.05284e-12	1.0881e-11
AC090044.1	ENSG00000224239	lncRNA	0.587594	0.546596	0.197134	2.77271	0.0055591	0.0133458
LINC01133	ENSG00000224259	lncRNA	439.146	-0.435921	0.0845588	-5.15525	2.53299e-07	1.29129e-06
AP000697.1	ENSG00000224269	lncRNA	4.22386	-0.486365	0.129303	-3.76143	0.000168946	0.000550047
SLC25A5-AS1	ENSG00000224281	lncRNA	48.1986	-0.368331	0.0595904	-6.18105	6.36754e-10	4.61469e-09
AL161785.1	ENSG00000224307	lncRNA	5.25225	0.600823	0.120392	4.99054	6.02115e-07	2.91297e-06
STK24-AS1	ENSG00000224418	lncRNA	11.8219	-0.183299	0.0755825	-2.42515	0.015302	0.0328659
AC096677.1	ENSG00000224536	lncRNA	17.0127	-0.23684	0.0716135	-3.3072	0.000942329	0.00266866
AC016716.1	ENSG00000224731	lncRNA	0.309401	-1.33036	0.58593	-2.27051	0.0231769	0.0473105
AP000704.2	ENSG00000224790	lncRNA	5.31623	-0.335474	0.0822784	-4.0773	4.55616e-05	0.00016438
LINC00853	ENSG00000224805	lncRNA	18.9786	-0.40376	0.0756951	-5.33403	9.60577e-08	5.21322e-07
THRB-IT1	ENSG00000224822	lncRNA	0.391976	-0.581846	0.245747	-2.36767	0.0179007	0.0377684
LINC00393	ENSG00000224853	lncRNA	6.97622	0.792409	0.322971	2.4535	0.0141474	0.0306772
MRPL20-AS1	ENSG00000224870	lncRNA	559.753	-0.258114	0.0413384	-6.24393	4.26715e-10	3.1608e-09
AC011754.1	ENSG00000224879	lncRNA	6.02521	-2.0563	0.378828	-5.42806	5.69711e-08	3.19347e-07
POT1-AS1	ENSG00000224897	lncRNA	7.45885	0.72967	0.125276	5.82449	5.72886e-09	3.67464e-08
AL353150.1	ENSG00000224945	lncRNA	33.1217	-0.319884	0.10385	-3.08024	0.00206834	0.00546333
AL390066.2	ENSG00000224950	lncRNA	23.2204	-0.179072	0.0765934	-2.33795	0.0193898	0.040457
LINC01266	ENSG00000224957	lncRNA	1.17474	0.907104	0.164929	5.49998	3.79837e-08	2.18095e-07
PGM5-AS1	ENSG00000224958	lncRNA	2.27781	0.632089	0.224703	2.81299	0.00490825	0.0119531
LINC01752	ENSG00000224961	lncRNA	32.1294	-0.370574	0.125575	-2.95101	0.00316739	0.00804934
AC000067.1	ENSG00000225007	lncRNA	0.899948	-0.350176	0.149704	-2.33912	0.0193291	0.0403589
CATIP-AS1	ENSG00000225062	lncRNA	4.89484	-0.585552	0.102127	-5.73358	9.8334e-09	6.11353e-08
GRTP1-AS1	ENSG00000225083	lncRNA	10.5704	-0.315427	0.091766	-3.4373	0.000587544	0.00172832
SLC9A3-AS1	ENSG00000225138	lncRNA	1080.3	-0.76479	0.107392	-7.12151	1.06749e-12	1.10265e-11
AC073957.1	ENSG00000225146	lncRNA	0.781975	-0.561675	0.197962	-2.83728	0.00454997	0.0111501
LINC00618	ENSG00000225163	lncRNA	4.71912	-0.361602	0.112929	-3.20202	0.00136465	0.00374322
AL590617.2	ENSG00000225177	lncRNA	53.2991	-0.333127	0.0635665	-5.2406	1.60053e-07	8.38286e-07
AC073283.1	ENSG00000225187	lncRNA	14.5153	-0.278009	0.121898	-2.28067	0.0225677	0.0462398
AC078962.1	ENSG00000225195	lncRNA	1.76481	-1.03841	0.168056	-6.17893	6.45382e-10	4.67279e-09
AC007362.1	ENSG00000225216	lncRNA	0.878684	0.684221	0.168066	4.07115	4.67823e-05	0.000168371
AL354740.1	ENSG00000225339	lncRNA	5.62971	-0.300863	0.0840602	-3.57913	0.000344735	0.00105914
LRRK2-DT	ENSG00000225342	lncRNA	3.02185	0.508929	0.138599	3.67196	0.000240698	0.000759838
CR786580.1	ENSG00000225411	lncRNA	2.0524	0.656517	0.159933	4.10494	4.04427e-05	0.000147246
LINC01671	ENSG00000225431	lncRNA	2.54153	-0.500687	0.170189	-2.94194	0.00326165	0.00826088
AL021707.1	ENSG00000225450	lncRNA	4.22745	-0.542252	0.0975891	-5.55648	2.75264e-08	1.61347e-07
RFPL1S	ENSG00000225465	lncRNA	3.00163	0.662755	0.12395	5.34694	8.94529e-08	4.87831e-07
LINC01703	ENSG00000225518	lncRNA	27.7496	-0.443992	0.0831462	-5.3399	9.29997e-08	5.05875e-07
AL606491.1	ENSG00000225643	lncRNA	5.0686	-0.382448	0.113596	-3.36674	0.000760637	0.00219145
CADM3-AS1	ENSG00000225670	lncRNA	6.22122	0.903203	0.163186	5.53481	3.11572e-08	1.81295e-07
FAM225B	ENSG00000225684	lncRNA	6.23921	0.508351	0.110652	4.59416	4.34497e-06	1.84971e-05
AL592166.1	ENSG00000225721	lncRNA	8.87812	-0.339758	0.0657377	-5.16839	2.36124e-07	1.20857e-06
AC087501.1	ENSG00000225751	lncRNA	0.768655	-0.536969	0.195879	-2.74133	0.0061191	0.0145314
AC073321.1	ENSG00000225794	lncRNA	0.619097	-1.36781	0.237295	-5.76419	8.20527e-09	5.15411e-08
AL121917.1	ENSG00000225806	lncRNA	16.0203	0.568441	0.130902	4.34248	1.40885e-05	5.53136e-05
TRMT2B-AS1	ENSG00000225839	lncRNA	0.876127	-0.437125	0.172607	-2.53248	0.0113258	0.0251422
AL355490.1	ENSG00000225850	lncRNA	5.22105	-0.570666	0.102726	-5.55523	2.77254e-08	1.62439e-07
LINC00115	ENSG00000225880	lncRNA	28.5648	-0.276299	0.0636745	-4.33924	1.42975e-05	5.60596e-05
AL391244.1	ENSG00000225905	lncRNA	1.61111	0.52746	0.141405	3.73015	0.000191365	0.000616214
AL109741.1	ENSG00000225938	lncRNA	2.8378	0.633078	0.113694	5.56826	2.57292e-08	1.51347e-07
AC009950.1	ENSG00000225963	lncRNA	13.4955	0.58173	0.0900806	6.45788	1.06179e-10	8.54734e-10
HAR1A	ENSG00000225978	lncRNA	64.7252	-1.10614	0.135748	-8.14852	3.6842e-16	5.89796e-15
LINC02528	ENSG00000226004	lncRNA	1.20639	1.07773	0.200642	5.3714	7.81281e-08	4.29564e-07
BX005266.2	ENSG00000226007	lncRNA	0.972056	0.701345	0.175354	3.99959	6.34536e-05	0.000223141
KCNIP2-AS1	ENSG00000226009	lncRNA	8.14599	-0.332647	0.0717841	-4.63399	3.5869e-06	1.54697e-05
AP001434.1	ENSG00000226012	lncRNA	1.34169	0.573161	0.225196	2.54517	0.0109226	0.0243432
AC010745.1	ENSG00000226041	lncRNA	2.26448	-0.743716	0.173223	-4.29339	1.75962e-05	6.79824e-05
AL807761.3	ENSG00000226047	lncRNA	3.583	-0.926212	0.280861	-3.29776	0.00097459	0.00275391
DDC-AS1	ENSG00000226122	lncRNA	3.10742	-1.20262	0.183803	-6.54301	6.02923e-11	5.02489e-10
BAIAP2-DT	ENSG00000226137	lncRNA	687.606	-0.135375	0.0566178	-2.39103	0.0168014	0.0356952
LINC00685	ENSG00000226179	lncRNA	20.1414	-0.269057	0.0918915	-2.92799	0.00341163	0.00860368
AL583785.1	ENSG00000226197	lncRNA	6.24102	0.753156	0.168277	4.47569	7.61663e-06	3.12421e-05
GAS1RR	ENSG00000226237	lncRNA	3.32647	0.753399	0.161541	4.66383	3.10382e-06	1.35097e-05
AL135960.1	ENSG00000226252	lncRNA	2.05802	0.672961	0.129631	5.19135	2.08774e-07	1.07593e-06
ARHGAP26-AS1	ENSG00000226272	lncRNA	0.769149	-1.0451	0.205696	-5.0808	3.75846e-07	1.87062e-06
AL031123.1	ENSG00000226281	lncRNA	4.24162	-0.441377	0.115004	-3.83792	0.000124082	0.000413843
AL122058.1	ENSG00000226308	lncRNA	4.81896	-0.634911	0.180955	-3.50867	0.000450362	0.00135481
NUP50-DT	ENSG00000226328	lncRNA	233.068	-0.347195	0.0657375	-5.28153	1.2811e-07	6.82202e-07
AL354836.1	ENSG00000226332	lncRNA	62.9776	-0.428225	0.0733841	-5.83539	5.36645e-09	3.45668e-08
HAGLROS	ENSG00000226363	lncRNA	32.2	-0.862155	0.127903	-6.74071	1.57611e-11	1.41273e-10
AC084809.1	ENSG00000226377	lncRNA	11.2495	-0.160067	0.0621129	-2.57704	0.00996497	0.0224515
AC016831.1	ENSG00000226380	lncRNA	88.5276	-0.182077	0.0759029	-2.39881	0.0164483	0.0350346
PARD3-AS1	ENSG00000226386	lncRNA	2.72452	-0.303	0.112206	-2.70039	0.0069258	0.0162424
Z93930.2	ENSG00000226471	lncRNA	19.8863	-0.209037	0.0654527	-3.19371	0.00140458	0.00384116
LINC00323	ENSG00000226496	lncRNA	8.51344	-0.350231	0.126944	-2.75895	0.00579874	0.0138498
LINC01918	ENSG00000226508	lncRNA	1.21555	0.55476	0.240467	2.30701	0.0210544	0.0434933
BTBD9-AS1	ENSG00000226533	lncRNA	0.485427	-0.785044	0.241664	-3.24849	0.00116019	0.00323059
CYP4F26P	ENSG00000226562	lncRNA	3.57765	1.04584	0.266454	3.92505	8.67121e-05	0.000297542
AL592429.2	ENSG00000226571	lncRNA	0.4674	0.769244	0.276106	2.78605	0.00533546	0.0128647
AL121899.1	ENSG00000226644	lncRNA	18.8054	-0.46597	0.117556	-3.96381	7.37625e-05	0.000256165
AL354977.1	ENSG00000226669	lncRNA	0.544411	0.62897	0.213773	2.94223	0.00325853	0.00825351
AL161452.1	ENSG00000226706	lncRNA	12.0542	-0.48433	0.0815979	-5.93557	2.92827e-09	1.954e-08
FAM66C	ENSG00000226711	lncRNA	12.6405	0.507277	0.0924511	5.48698	4.08864e-08	2.33639e-07
SMCR5	ENSG00000226746	lncRNA	1.45881	-0.47043	0.188209	-2.49951	0.0124365	0.0273459
LINC02668	ENSG00000226762	lncRNA	0.401128	0.697449	0.275308	2.53334	0.0112981	0.0250865
FAM30A	ENSG00000226777	lncRNA	54.3242	0.600429	0.148495	4.04343	5.2675e-05	0.000187899
AC005082.1	ENSG00000226816	lncRNA	3.5199	0.522438	0.126275	4.1373	3.51411e-05	0.000129448
MEIS1-AS3	ENSG00000226819	lncRNA	0.54312	0.701324	0.239828	2.92427	0.00345263	0.00869618
AC006001.2	ENSG00000226824	lncRNA	40.3399	-0.206314	0.0672272	-3.06891	0.00214844	0.00565264
AC004112.1	ENSG00000226851	lncRNA	1.98975	0.515212	0.119512	4.31098	1.62536e-05	6.31204e-05
THORLNC	ENSG00000226856	lncRNA	8.25114	-0.253051	0.112107	-2.25723	0.0239935	0.0487637
AC104463.2	ENSG00000226862	lncRNA	2.99935	-0.408458	0.114127	-3.57897	0.000344947	0.00105971
AL731577.1	ENSG00000226899	lncRNA	0.474187	-0.773587	0.217545	-3.55599	0.000376562	0.00114907
BSN-DT	ENSG00000226913	lncRNA	1.14792	0.572971	0.186629	3.07011	0.00213983	0.00563192
RNF207-AS1	ENSG00000226944	lncRNA	8.62975	-0.463691	0.099852	-4.64378	3.42088e-06	1.48189e-05
DANCR	ENSG00000226950	lncRNA	1835.02	-0.620263	0.0592216	-10.4736	1.14204e-25	5.8446e-24
AC078883.2	ENSG00000226963	lncRNA	1.30919	-0.350689	0.129387	-2.71039	0.0067204	0.0157994
AL391845.1	ENSG00000226969	lncRNA	0.852991	-0.462857	0.169479	-2.73105	0.00631321	0.0149358
LINC00511	ENSG00000227036	lncRNA	1171.34	-0.178384	0.0555026	-3.21397	0.00130911	0.00360823
MUC12-AS1	ENSG00000227053	lncRNA	35.9579	-0.582984	0.0968672	-6.01838	1.76167e-09	1.2091e-08
EPS15-AS1	ENSG00000227070	lncRNA	18.1994	-0.336468	0.0786279	-4.27924	1.87531e-05	7.21603e-05
LINC02798	ENSG00000227082	lncRNA	2.74828	0.536831	0.146638	3.66094	0.000251295	0.000791463
L29074.1	ENSG00000227083	lncRNA	1.25388	0.800741	0.15776	5.0757	3.86079e-07	1.91755e-06
IL21-AS1	ENSG00000227145	lncRNA	1.41755	0.61201	0.177601	3.44598	0.000568982	0.00167772
MIR663AHG	ENSG00000227195	lncRNA	2.17629	-1.48071	0.240486	-6.15717	7.40556e-10	5.32457e-09
AL133346.1	ENSG00000227220	lncRNA	7.45304	-0.639703	0.111606	-5.73178	9.93826e-09	6.17671e-08
AL606534.1	ENSG00000227230	lncRNA	0.964029	0.614504	0.159375	3.85571	0.000115394	0.000386627
AC092042.1	ENSG00000227245	lncRNA	0.495081	0.519187	0.174271	2.97919	0.00289008	0.00740316
SMIM2-AS1	ENSG00000227258	lncRNA	153.642	-0.424514	0.119812	-3.54318	0.000395335	0.00120195
LINC02832	ENSG00000227308	lncRNA	1.35461	-0.483249	0.181587	-2.66126	0.00778487	0.0180478
AL133410.1	ENSG00000227388	lncRNA	26.0428	-0.199698	0.0751192	-2.65841	0.00785095	0.0181855
LINC01537	ENSG00000227467	lncRNA	2.85577	0.51942	0.125007	4.15513	3.25098e-05	0.000120522
AL157702.2	ENSG00000227482	lncRNA	1.04404	0.72708	0.15549	4.67605	2.92455e-06	1.27643e-05
CR559946.1	ENSG00000227484	lncRNA	0.90601	-0.675308	0.192602	-3.50623	0.000454499	0.00136639
KIF1C-AS1	ENSG00000227495	lncRNA	7.63598	-0.475289	0.0904114	-5.25696	1.46457e-07	7.7152e-07
AL592301.1	ENSG00000227512	lncRNA	4.74187	-0.757285	0.10587	-7.153	8.49025e-13	8.89487e-12
AC096540.1	ENSG00000227527	lncRNA	5.76312	-0.194109	0.0822458	-2.36011	0.0182695	0.0384235
DNAJC9-AS1	ENSG00000227540	lncRNA	49.2587	-0.181647	0.065157	-2.78784	0.00530614	0.0128029
SPAG5-AS1	ENSG00000227543	lncRNA	46.071	-0.169092	0.0622599	-2.71591	0.00660943	0.0155647
CERS6-AS1	ENSG00000227617	lncRNA	4.57838	-0.537269	0.100499	-5.346	8.99199e-08	4.90238e-07
SOX21-AS1	ENSG00000227640	lncRNA	1.5196	1.63217	0.275171	5.93148	3.00209e-09	1.99943e-08
SUCLA2-AS1	ENSG00000227848	lncRNA	13.4544	-0.266941	0.0827796	-3.22472	0.00126095	0.00348529
AL731569.1	ENSG00000227896	lncRNA	31.5194	-0.330703	0.0700358	-4.72191	2.33642e-06	1.0357e-05
SNAP25-AS1	ENSG00000227906	lncRNA	0.552353	0.711448	0.226201	3.1452	0.00165974	0.00447178
LINC01341	ENSG00000227953	lncRNA	19.2063	-0.30922	0.0973111	-3.17764	0.0014848	0.0040409
AL451042.2	ENSG00000227959	lncRNA	16.2039	-0.288533	0.0677442	-4.25915	2.05207e-05	7.84643e-05
RBM15-AS1	ENSG00000227963	lncRNA	14.9826	-0.230597	0.0583704	-3.95058	7.7962e-05	0.000269672
AC073343.2	ENSG00000228010	lncRNA	2.61639	0.601714	0.107458	5.5995	2.14966e-08	1.27747e-07
AL139246.3	ENSG00000228037	lncRNA	60.5331	-0.354214	0.0835759	-4.23823	2.25289e-05	8.5561e-05
FAM245A	ENSG00000228055	lncRNA	0.957994	-0.487564	0.208391	-2.33966	0.0193015	0.0403058
AC118553.1	ENSG00000228084	lncRNA	18.8757	-0.201693	0.0603839	-3.34017	0.00083726	0.00239506
MELTF-AS1	ENSG00000228109	lncRNA	87.3486	-0.341544	0.0682578	-5.00374	5.62292e-07	2.73136e-06
AL357140.2	ENSG00000228150	lncRNA	10.3094	-0.353122	0.0664773	-5.31193	1.08472e-07	5.84052e-07
AC007952.2	ENSG00000228157	lncRNA	2.19155	-0.382343	0.16534	-2.31246	0.0207522	0.0429434
AL022341.1	ENSG00000228201	lncRNA	3.87257	-0.338039	0.103826	-3.25583	0.00113063	0.00315542
LINC00578	ENSG00000228221	lncRNA	19.6959	0.701096	0.112469	6.23366	4.55647e-10	3.36273e-09
AC012442.1	ENSG00000228251	lncRNA	4.83093	-0.25483	0.0765092	-3.33072	0.000866229	0.00247091
ITPRIP-AS1	ENSG00000228261	lncRNA	2.5695	-0.316585	0.118107	-2.68048	0.00735164	0.0171369
PCAT6	ENSG00000228288	lncRNA	75.8995	-0.399522	0.0672307	-5.94255	2.80623e-09	1.87551e-08
AL512770.1	ENSG00000228302	lncRNA	37.7717	-0.206646	0.0665368	-3.10573	0.00189809	0.00505307
MIR646HG	ENSG00000228340	lncRNA	5.724	0.71885	0.181079	3.96983	7.19251e-05	0.000250284
LINC02263	ENSG00000228358	lncRNA	2.05894	-0.887217	0.249569	-3.555	0.000377978	0.00115257
LINC01635	ENSG00000228397	lncRNA	1.95415	-0.348648	0.112124	-3.10949	0.0018741	0.00499545
AL137244.1	ENSG00000228444	lncRNA	10.3561	-0.451598	0.102271	-4.41571	1.00679e-05	4.05014e-05
MIR34AHG	ENSG00000228526	lncRNA	2.57965	-0.382241	0.110356	-3.46371	0.000532779	0.00158035
LYPLAL1-AS1	ENSG00000228536	lncRNA	0.845264	0.826208	0.263873	3.13108	0.00174164	0.00467072
AC093159.1	ENSG00000228541	lncRNA	1.10173	-0.39811	0.148288	-2.68471	0.00725921	0.0169442
Z97056.1	ENSG00000228620	lncRNA	1.42065	-0.616627	0.209699	-2.94054	0.00327642	0.00829609
AL451047.1	ENSG00000228625	lncRNA	0.267096	-0.684386	0.244304	-2.80137	0.00508857	0.012341
LINC00659	ENSG00000228705	lncRNA	51.7818	-0.67278	0.131913	-5.1002	3.39296e-07	1.70111e-06
LINC02575	ENSG00000228709	lncRNA	9.6359	0.529803	0.204629	2.58909	0.00962287	0.0217663
SRGAP3-AS2	ENSG00000228723	lncRNA	1.79261	-0.521286	0.220458	-2.36456	0.0180514	0.0380402
SPATA13	ENSG00000228741	lncRNA	3.31764	0.532235	0.133679	3.98144	6.84988e-05	0.000239255
AL356310.1	ENSG00000228792	lncRNA	2.58822	-0.483249	0.133206	-3.62783	0.000285817	0.000890579
PIK3IP1-DT	ENSG00000228839	lncRNA	9.85974	-0.351726	0.0808572	-4.34997	1.36157e-05	5.35621e-05
AC068389.1	ENSG00000228862	lncRNA	0.428379	-0.690263	0.210329	-3.28182	0.00103138	0.00289937
AL138963.1	ENSG00000228886	lncRNA	2.19682	-0.338349	0.128734	-2.62829	0.00858164	0.0196683
UBAC2-AS1	ENSG00000228889	lncRNA	47.2602	-0.309264	0.0689798	-4.4834	7.34638e-06	3.02114e-05
LINC02607	ENSG00000228971	lncRNA	0.562853	0.779823	0.242706	3.21304	0.00131339	0.00361871
LINC02587	ENSG00000229108	lncRNA	1.68441	1.01921	0.240886	4.23109	2.32565e-05	8.81492e-05
MED4-AS1	ENSG00000229111	lncRNA	4.79177	-0.553716	0.0906013	-6.11157	9.8655e-10	6.96745e-09
AC233280.1	ENSG00000229178	lncRNA	5.6776	-0.390616	0.0980011	-3.98583	6.72435e-05	0.000235235
AC087071.1	ENSG00000229196	lncRNA	5.42328	-0.408499	0.151231	-2.70115	0.00691008	0.0162065
SNHG31	ENSG00000229267	lncRNA	4.84625	0.504432	0.117357	4.29826	1.72141e-05	6.65934e-05
AL133353.1	ENSG00000229278	lncRNA	1.5106	-0.288166	0.123796	-2.32776	0.0199249	0.0414424
AL353693.1	ENSG00000229312	lncRNA	6.38577	-0.441515	0.135234	-3.26482	0.00109535	0.00306523
ACAP2-IT1	ENSG00000229325	lncRNA	4.43136	0.575018	0.0950316	6.05081	1.44123e-09	9.99032e-09
AC006947.1	ENSG00000229330	lncRNA	0.326881	-0.656442	0.249639	-2.62956	0.00854948	0.019604
GK-IT1	ENSG00000229331	lncRNA	2.22522	-0.683378	0.142369	-4.80006	1.58616e-06	7.20844e-06
AC046143.1	ENSG00000229334	lncRNA	46.748	-0.292307	0.0515298	-5.67257	1.40671e-08	8.57415e-08
HYI-AS1	ENSG00000229348	lncRNA	6.43209	-0.426082	0.088256	-4.82779	1.38053e-06	6.33151e-06
LRRC3-DT	ENSG00000229356	lncRNA	1.08023	-0.366231	0.155822	-2.35031	0.0187578	0.0393191
SZT2-AS1	ENSG00000229372	lncRNA	1.25632	-0.368172	0.141716	-2.59795	0.00937832	0.0212723
AJ009632.2	ENSG00000229425	lncRNA	1.2391	0.789514	0.146587	5.38598	7.20514e-08	3.981e-07
AL391863.1	ENSG00000229502	lncRNA	0.644987	-0.565555	0.187172	-3.02158	0.00251459	0.00652395
AL158825.2	ENSG00000229587	lncRNA	5.20667	-0.277866	0.0891281	-3.11761	0.00182327	0.00487117
AC006017.1	ENSG00000229591	lncRNA	3.89392	-0.304388	0.0990153	-3.07415	0.00211102	0.00556297
AC011287.1	ENSG00000229618	lncRNA	1.27288	0.861644	0.276991	3.11073	0.00186627	0.00497677
MBNL1-AS1	ENSG00000229619	lncRNA	94.8108	0.582697	0.0827685	7.04008	1.92131e-12	1.92277e-11
AC073115.1	ENSG00000229628	lncRNA	0.724512	0.529425	0.174969	3.02582	0.00247958	0.00644267
ITGB1-DT	ENSG00000229656	lncRNA	7.80894	-0.467609	0.0969126	-4.82506	1.39959e-06	6.41006e-06
AC004975.2	ENSG00000229660	lncRNA	7.93828	-0.324605	0.0949995	-3.41691	0.000633352	0.00185223
LINC00484	ENSG00000229694	lncRNA	1.60338	-0.544614	0.163853	-3.3238	0.000887991	0.00252638
MIR194-2HG	ENSG00000229719	lncRNA	499.591	-0.546638	0.0764557	-7.14974	8.69429e-13	9.09119e-12
AL109924.1	ENSG00000229720	lncRNA	0.889282	0.551228	0.198664	2.77467	0.00552579	0.013275
LINC01054	ENSG00000229723	lncRNA	0.461401	-0.512356	0.21853	-2.34456	0.0190495	0.0398689
AC013460.1	ENSG00000229727	lncRNA	0.68372	0.56867	0.186789	3.04444	0.00233111	0.00609132
AC103925.1	ENSG00000229821	lncRNA	0.677449	-0.861111	0.222387	-3.87213	0.000107889	0.000363582
AC019205.1	ENSG00000229852	lncRNA	17.4197	0.635029	0.0847817	7.49017	6.8785e-14	8.26393e-13
AL121972.1	ENSG00000229862	lncRNA	2.75961	-0.363382	0.119063	-3.05201	0.00227314	0.00595286
LINC01315	ENSG00000229891	lncRNA	182.37	-0.519551	0.081448	-6.37892	1.78338e-10	1.39165e-09
AL157373.2	ENSG00000229896	lncRNA	4.36545	-0.335852	0.131811	-2.54799	0.0108346	0.0241739
AC016999.1	ENSG00000229915	lncRNA	1.53257	-0.326608	0.130983	-2.49352	0.0126484	0.0277639
PDE11A-AS1	ENSG00000229941	lncRNA	1.37165	-0.580468	0.246842	-2.35158	0.0186941	0.0392065
TFAP2A-AS1	ENSG00000229950	lncRNA	29.8544	-0.567463	0.140005	-4.05317	5.0528e-05	0.000180831
AL590483.1	ENSG00000229960	lncRNA	8.55254	-0.25073	0.111005	-2.25872	0.023901	0.0486016
AL606468.1	ENSG00000229983	lncRNA	0.592143	-0.42346	0.165691	-2.55572	0.0105967	0.0237041
AC093585.1	ENSG00000229996	lncRNA	7.91598	-0.561482	0.147224	-3.81381	0.000136841	0.000452925
AL049646.1	ENSG00000230010	lncRNA	1.06678	0.500776	0.172215	2.90786	0.0036391	0.00911122
TRPM2-AS	ENSG00000230061	lncRNA	160.105	-0.331399	0.125448	-2.64173	0.00824844	0.0190003
PRRT3-AS1	ENSG00000230082	lncRNA	81.2088	-0.403074	0.076403	-5.27563	1.323e-07	7.02554e-07
LINC02028	ENSG00000230102	lncRNA	8.36461	-0.319179	0.105234	-3.03305	0.00242099	0.00630119
LINC02812	ENSG00000230138	lncRNA	0.844127	0.997127	0.203991	4.88809	1.01821e-06	4.75856e-06
NPAS2-AS1	ENSG00000230140	lncRNA	0.929215	-0.536043	0.165371	-3.24146	0.0011892	0.00330247
AL122010.1	ENSG00000230163	lncRNA	48.725	-0.187449	0.0451319	-4.15337	3.27615e-05	0.000121431
LINC01433	ENSG00000230176	lncRNA	2.83353	-0.2542	0.10352	-2.45556	0.0140664	0.030526
C9orf147	ENSG00000230185	lncRNA	9.38491	-0.161711	0.0649537	-2.48964	0.0127874	0.0280287
AL162582.1	ENSG00000230234	lncRNA	33.0581	-0.762092	0.180013	-4.23354	2.30042e-05	8.72795e-05
NFE4	ENSG00000230257	lncRNA	1.33236	0.821979	0.189803	4.33069	1.48641e-05	5.81082e-05
LINC02603	ENSG00000230262	lncRNA	3.00153	-0.405492	0.105899	-3.82906	0.000128635	0.000427876
AL358781.2	ENSG00000230289	lncRNA	1.4877	-0.445634	0.1344	-3.31574	0.000914015	0.00259347
FEZF1-AS1	ENSG00000230316	lncRNA	166.113	-0.5286	0.1752	-3.01712	0.0025519	0.00660908
AC004160.1	ENSG00000230333	lncRNA	4.78522	0.689552	0.123764	5.57153	2.52516e-08	1.48743e-07
EXOSC10-AS1	ENSG00000230337	lncRNA	14.0591	-0.258614	0.0743898	-3.47647	0.000508069	0.00151387
BZW1-AS1	ENSG00000230408	lncRNA	1.70403	-0.860051	0.196572	-4.37525	1.21295e-05	4.81613e-05
EMC1-AS1	ENSG00000230424	lncRNA	8.86352	-0.162213	0.0720368	-2.2518	0.0243347	0.0493706
AL078645.1	ENSG00000230470	lncRNA	0.287122	-0.541456	0.230285	-2.35124	0.018711	0.0392311
AL035409.1	ENSG00000230498	lncRNA	1.28483	0.744087	0.161068	4.61969	3.8431e-06	1.64893e-05
AL356234.2	ENSG00000230533	lncRNA	4.70704	-0.426458	0.164948	-2.5854	0.00972647	0.0219734
AL158071.2	ENSG00000230537	lncRNA	6.95631	-0.325991	0.101742	-3.20411	0.00135479	0.00371911
LINC02580	ENSG00000230587	lncRNA	6.46781	-0.446901	0.11849	-3.77162	0.00016219	0.000529901
HM13-AS1	ENSG00000230613	lncRNA	3.82621	-0.285905	0.0925004	-3.09085	0.00199581	0.00528746
AC104461.1	ENSG00000230623	lncRNA	0.800852	0.585921	0.193503	3.02797	0.00246206	0.00640024
DNM3OS	ENSG00000230630	lncRNA	50.9838	0.740393	0.081611	9.07222	1.16615e-19	2.87618e-18
AC105935.2	ENSG00000230698	lncRNA	2.16906	-1.24946	0.155543	-8.03289	9.52051e-16	1.44486e-14
AL590093.1	ENSG00000230728	lncRNA	1.04587	-0.54004	0.172158	-3.13689	0.00170748	0.00458898
AC092171.2	ENSG00000230733	lncRNA	391.085	-0.140588	0.0607524	-2.31411	0.0206616	0.0427767
AC007036.2	ENSG00000230751	lncRNA	0.997152	-0.870129	0.186926	-4.65494	3.2408e-06	1.40787e-05
LINC01614	ENSG00000230838	lncRNA	18.4932	0.685186	0.172012	3.98335	6.79502e-05	0.000237599
AL604028.1	ENSG00000230896	lncRNA	49.3042	-0.176163	0.0442722	-3.97909	6.91784e-05	0.000241496
AL391807.1	ENSG00000230910	lncRNA	1.06223	0.631654	0.185128	3.41199	0.000644905	0.00188372
AL109917.1	ENSG00000231050	lncRNA	11.7144	-0.33384	0.091065	-3.66595	0.000246424	0.000776823
AC234582.1	ENSG00000231064	lncRNA	24.0785	-0.277818	0.0801741	-3.46519	0.00052986	0.00157255
AC022395.1	ENSG00000231104	lncRNA	1.71813	0.664962	0.135888	4.89347	9.90755e-07	4.63537e-06
LINC01436	ENSG00000231106	lncRNA	29.7206	0.575348	0.140442	4.09671	4.1907e-05	0.000152056
AL035587.1	ENSG00000231113	lncRNA	59.0021	-0.241789	0.0532794	-4.53813	5.67551e-06	2.3741e-05
HAR1B	ENSG00000231133	lncRNA	13.4793	-0.794092	0.163924	-4.84427	1.27078e-06	5.85946e-06
DNAH8-AS1	ENSG00000231150	lncRNA	0.444828	0.65422	0.225506	2.90112	0.00371836	0.00929201
AC007099.1	ENSG00000231172	lncRNA	29.5584	-0.429171	0.147713	-2.90544	0.00366734	0.0091741
LINC00852	ENSG00000231177	lncRNA	29.0373	-0.242701	0.061261	-3.96176	7.43993e-05	0.000258236
AL356056.2	ENSG00000231187	lncRNA	1.19403	0.504225	0.169251	2.97916	0.00289036	0.00740338
AL139819.1	ENSG00000231188	lncRNA	0.372389	-0.53729	0.211916	-2.53539	0.0112321	0.0249546
FARP1-AS1	ENSG00000231194	lncRNA	2.79368	-0.652848	0.134498	-4.85396	1.21017e-06	5.59823e-06
TBL1XR1-AS1	ENSG00000231310	lncRNA	1.2032	-0.368773	0.155386	-2.37328	0.0176311	0.0372674
GNA14-AS1	ENSG00000231373	lncRNA	0.679356	-1.07823	0.206667	-5.21725	1.81595e-07	9.44258e-07
AC005392.2	ENSG00000231412	lncRNA	23.3572	-0.716916	0.1714	-4.18269	2.88075e-05	0.00010761
LINC02015	ENSG00000231574	lncRNA	1.38663	0.617062	0.170709	3.61471	0.000300688	0.000933415
DLG3-AS1	ENSG00000231651	lncRNA	7.23409	-0.623597	0.103897	-6.00205	1.9484e-09	1.33009e-08
COA6-AS1	ENSG00000231663	lncRNA	27.6971	-0.26317	0.0675552	-3.89562	9.79464e-05	0.000332392
DIRC3	ENSG00000231672	lncRNA	4.17194	0.732951	0.124397	5.89204	3.81465e-09	2.50654e-08
AL033397.1	ENSG00000231683	lncRNA	15.6754	0.624899	0.229069	2.72799	0.00637209	0.0150649
AL451069.2	ENSG00000231705	lncRNA	1.51496	-0.886782	0.153489	-5.77749	7.58218e-09	4.78079e-08
LINC01273	ENSG00000231742	lncRNA	16.7587	-0.472997	0.105046	-4.50276	6.70782e-06	2.77826e-05
AL596223.2	ENSG00000231748	lncRNA	7.36153	-0.474676	0.109969	-4.31645	1.58558e-05	6.16697e-05
LINC01354	ENSG00000231768	lncRNA	2.51444	0.596901	0.159728	3.73698	0.000186241	0.000601184
TMEM44-AS1	ENSG00000231770	lncRNA	110.802	-0.163976	0.0518227	-3.16417	0.00155528	0.0042123
PIK3CD-AS2	ENSG00000231789	lncRNA	21.4127	-0.439479	0.123127	-3.56933	0.000357898	0.00109632
LINC01198	ENSG00000231817	lncRNA	1.15676	0.803048	0.275264	2.91738	0.00352989	0.00887089
AL162377.1	ENSG00000231856	lncRNA	66.8446	-0.211053	0.0608205	-3.4701	0.000520267	0.00154696
AL031848.1	ENSG00000231868	lncRNA	2.3937	-0.398763	0.168153	-2.37143	0.0177194	0.0374313
IPO9-AS1	ENSG00000231871	lncRNA	4.61301	-0.29083	0.0830525	-3.50176	0.000462189	0.00138755
F10-AS1	ENSG00000231882	lncRNA	0.308735	-0.608352	0.25208	-2.41333	0.0158074	0.0338014
IDH1-AS1	ENSG00000231908	lncRNA	10.3679	-0.192863	0.0805885	-2.39318	0.0167029	0.0355157
NEBL-AS1	ENSG00000231920	lncRNA	7.49727	-0.52911	0.0881956	-5.99928	1.98197e-09	1.35156e-08
MMADHC-DT	ENSG00000231969	lncRNA	9.47005	-0.247609	0.0808417	-3.06289	0.00219211	0.00575722
AC092168.2	ENSG00000232034	lncRNA	2.89733	-0.270098	0.118264	-2.28386	0.02238	0.045897
LINC01798	ENSG00000232046	lncRNA	1.36489	0.696459	0.160313	4.34437	1.39679e-05	5.48797e-05
LINC01063	ENSG00000232065	lncRNA	7.10032	-0.29005	0.0878841	-3.30036	0.000965593	0.0027307
DCST1-AS1	ENSG00000232093	lncRNA	45.5201	-0.538079	0.0733284	-7.33793	2.1692e-13	2.44549e-12
RFX3-AS1	ENSG00000232104	lncRNA	9.15478	0.594289	0.107705	5.51776	3.43354e-08	1.987e-07
RAP2C-AS1	ENSG00000232160	lncRNA	26.4532	0.555679	0.0637351	8.71858	2.81706e-18	5.84973e-17
AL121601.1	ENSG00000232412	lncRNA	5.4631	-0.313835	0.103393	-3.03535	0.00240253	0.00625913
ELN-AS1	ENSG00000232415	lncRNA	17.0133	-0.308705	0.112265	-2.74979	0.00596337	0.0141978
MHENCR	ENSG00000232442	lncRNA	235.294	-0.467631	0.0740736	-6.31306	2.73569e-10	2.08498e-09
TGFB2-AS1	ENSG00000232480	lncRNA	3.85346	0.609071	0.143927	4.23182	2.31807e-05	8.79054e-05
AC093673.1	ENSG00000232533	lncRNA	175.258	-0.172435	0.0570799	-3.02095	0.00251985	0.00653581
AC104088.1	ENSG00000232555	lncRNA	14.2408	-0.254619	0.0985159	-2.58454	0.00975079	0.0220244
MRTFA-AS1	ENSG00000232564	lncRNA	2.06591	-0.463678	0.126596	-3.66265	0.000249617	0.00078637
LINC02642	ENSG00000232591	lncRNA	0.759097	0.627327	0.166546	3.7667	0.000165421	0.000539349
TONSL-AS1	ENSG00000232600	lncRNA	13.0156	-0.36315	0.0771198	-4.70891	2.49045e-06	1.10003e-05
LINC01431	ENSG00000232645	lncRNA	11.2359	-0.255663	0.0911331	-2.80538	0.00502578	0.0122073
LINC01780	ENSG00000232650	lncRNA	0.468632	-0.708426	0.268717	-2.63633	0.00838077	0.0192599
ZNF687-AS1	ENSG00000232671	lncRNA	17.321	-0.184078	0.0615281	-2.99177	0.00277362	0.0071249
LINC00665	ENSG00000232677	lncRNA	89.1362	0.846773	0.134614	6.29039	3.16679e-10	2.39066e-09
ATP11A-AS1	ENSG00000232684	lncRNA	0.764603	-0.469245	0.195281	-2.40293	0.0162645	0.0346876
AP001596.1	ENSG00000232692	lncRNA	0.81668	0.735785	0.166484	4.41954	9.8909e-06	3.98482e-05
AC254562.2	ENSG00000232710	lncRNA	2.49534	-0.462887	0.134153	-3.45045	0.000559661	0.00165196
AL607028.1	ENSG00000232739	lncRNA	6.67681	-0.288387	0.0872721	-3.30446	0.000951612	0.00269276
AC135050.1	ENSG00000232748	lncRNA	13.5614	-0.137944	0.0514762	-2.67976	0.00736747	0.0171697
AL355916.1	ENSG00000232774	lncRNA	5.60946	0.533359	0.110703	4.81795	1.45042e-06	6.62778e-06
SLCO4A1-AS1	ENSG00000232803	lncRNA	380.268	-0.738899	0.125682	-5.87914	4.12411e-09	2.69551e-08
AP001610.3	ENSG00000232806	lncRNA	12.3432	-0.355232	0.105885	-3.35489	0.000793966	0.00228077
AC003986.2	ENSG00000232821	lncRNA	1.02805	0.839303	0.186676	4.49603	6.92334e-06	2.86101e-05
PTGES2-AS1	ENSG00000232850	lncRNA	31.8671	-0.364325	0.0967149	-3.767	0.00016522	0.000538785
AF165147.1	ENSG00000232855	lncRNA	5.12271	0.721677	0.122638	5.8846	3.99015e-09	2.61287e-08
AC080129.2	ENSG00000232874	lncRNA	15.9057	-0.274982	0.0939986	-2.92538	0.00344031	0.00866743
AL450344.3	ENSG00000232891	lncRNA	1.23444	-0.364128	0.144596	-2.51825	0.011794	0.0260715
LINC01166	ENSG00000232903	lncRNA	0.997322	-1.41822	0.325153	-4.3617	1.29056e-05	5.0968e-05
DLGAP4-AS1	ENSG00000232907	lncRNA	15.7594	-0.285196	0.0858692	-3.32129	0.000896031	0.00254736
SNHG15	ENSG00000232956	lncRNA	1000.25	-0.349199	0.0489833	-7.12894	1.01145e-12	1.04787e-11
LINC00327	ENSG00000232977	lncRNA	2.24083	0.587652	0.14591	4.02749	5.63756e-05	0.000200054
LINC01219	ENSG00000232987	lncRNA	1.07226	-0.690938	0.262343	-2.63372	0.00844553	0.0193866
MIR3936HG	ENSG00000233006	lncRNA	66.6787	-0.194576	0.0614883	-3.16443	0.00155385	0.00420903
SNHG7	ENSG00000233016	lncRNA	1501.77	-0.720306	0.0600757	-11.99	4.01081e-33	4.91439e-31
AL121832.1	ENSG00000233017	lncRNA	44.9907	-0.723937	0.131109	-5.52165	3.35831e-08	1.94611e-07
AC244453.2	ENSG00000233029	lncRNA	0.594138	0.618325	0.193495	3.19556	0.00139558	0.00381875
LINC00884	ENSG00000233058	lncRNA	31.9057	-0.292819	0.0992787	-2.94946	0.00318329	0.00808492
AL136307.1	ENSG00000233064	lncRNA	4.41752	-0.455365	0.149211	-3.05182	0.00227459	0.00595584
CCDC144NL-AS1	ENSG00000233098	lncRNA	32.9477	0.725531	0.112769	6.43376	1.24487e-10	9.92704e-10
LINC00702	ENSG00000233117	lncRNA	29.0453	0.775481	0.141574	5.47755	4.31244e-08	2.45511e-07
AC008105.1	ENSG00000233175	lncRNA	17.2271	-0.289974	0.0919382	-3.15401	0.00161046	0.00434975
LINC01687	ENSG00000233215	lncRNA	1.67807	0.628434	0.273611	2.29682	0.0216292	0.0445436
AC016876.2	ENSG00000233223	lncRNA	103.72	-0.298656	0.0645224	-4.62871	3.67947e-06	1.58292e-05
LINC00472	ENSG00000233237	lncRNA	2.29518	0.697913	0.119158	5.85705	4.71151e-09	3.0523e-08
OSTN-AS1	ENSG00000233308	lncRNA	0.96167	0.505941	0.205803	2.45837	0.0139568	0.030319
CHRM3-AS2	ENSG00000233355	lncRNA	14.5659	0.615585	0.111824	5.50496	3.69258e-08	2.125e-07
PDXP-DT	ENSG00000233360	lncRNA	8.32151	-0.319891	0.0871387	-3.67105	0.000241554	0.000762289
AC104809.2	ENSG00000233392	lncRNA	20.8387	-0.67704	0.203286	-3.33049	0.000866948	0.00247277
AL445524.1	ENSG00000233461	lncRNA	174.26	-0.641933	0.0663026	-9.68186	3.60089e-22	1.20753e-20
SYNJ2-IT1	ENSG00000233496	lncRNA	0.740971	-0.562173	0.185997	-3.02249	0.00250708	0.00650623
AC017104.2	ENSG00000233538	lncRNA	0.477828	-0.449853	0.192234	-2.34013	0.0192769	0.040261
B4GALT1-AS1	ENSG00000233554	lncRNA	32.0844	-0.345358	0.062544	-5.52184	3.35464e-08	1.94428e-07
LINC00513	ENSG00000233559	lncRNA	95.7827	-0.258667	0.105035	-2.46268	0.0137904	0.030007
LINC00462	ENSG00000233610	lncRNA	2.34224	-0.610879	0.245125	-2.49211	0.0126986	0.0278565
LINC01137	ENSG00000233621	lncRNA	157.519	-0.299794	0.0545088	-5.49992	3.7996e-08	2.18133e-07
AL035045.1	ENSG00000233625	lncRNA	2.0195	-0.406647	0.172835	-2.35281	0.0186323	0.039091
AC108047.1	ENSG00000233654	lncRNA	12.8846	-0.568741	0.088968	-6.39264	1.63041e-10	1.27907e-09
AC060234.2	ENSG00000233665	lncRNA	1.58221	0.803026	0.142276	5.64413	1.66019e-08	1.00122e-07
GAS6-AS1	ENSG00000233695	lncRNA	558.527	-0.399945	0.120602	-3.31624	0.000912369	0.00258919
AL162727.1	ENSG00000233817	lncRNA	2.41317	0.593215	0.129673	4.57469	4.76918e-06	2.01928e-05
AC005083.1	ENSG00000233834	lncRNA	91.3212	-0.186186	0.0712165	-2.61436	0.00893947	0.0203906
AC093732.1	ENSG00000233845	lncRNA	7.406	-0.458741	0.144617	-3.1721	0.0015134	0.00411287
EZR-AS1	ENSG00000233893	lncRNA	1.64032	-0.390803	0.149554	-2.61312	0.00897203	0.0204588
AC004012.1	ENSG00000233942	lncRNA	1.12088	-0.582662	0.172988	-3.36822	0.000756551	0.00218116
AL359715.1	ENSG00000233967	lncRNA	13.3839	-0.210842	0.0829334	-2.54231	0.0110124	0.0245205
AL158151.2	ENSG00000234055	lncRNA	0.803957	-0.392318	0.169064	-2.32052	0.0203126	0.0421477
TPRG1-AS1	ENSG00000234076	lncRNA	1.4684	0.609535	0.165576	3.6813	0.000232049	0.000734963
RNASEH1-AS1	ENSG00000234171	lncRNA	227.2	-0.240283	0.0521721	-4.60559	4.11299e-06	1.7578e-05
LINC01191	ENSG00000234199	lncRNA	1.7135	-0.385385	0.135907	-2.83565	0.00457329	0.0112015
ZFX-AS1	ENSG00000234230	lncRNA	0.950506	-0.427846	0.166403	-2.57115	0.0101362	0.0227908
MAP3K5-AS1	ENSG00000234263	lncRNA	4.68508	-0.443829	0.099043	-4.48117	7.42339e-06	3.05116e-05
LINC01641	ENSG00000234277	lncRNA	3.36061	-1.78554	0.226346	-7.88853	3.05765e-15	4.37466e-14
LINC01731	ENSG00000234283	lncRNA	0.380341	-0.786142	0.302381	-2.59983	0.00932687	0.0211745
AL451069.3	ENSG00000234311	lncRNA	3.91707	-0.42827	0.112697	-3.8002	0.000144577	0.000476099
AC007278.1	ENSG00000234389	lncRNA	2.32921	0.702356	0.159021	4.41675	1.00194e-05	4.03193e-05
AC023051.1	ENSG00000234428	lncRNA	1.76684	-0.526964	0.133597	-3.94443	7.99898e-05	0.000276086
AC092171.3	ENSG00000234432	lncRNA	92.2648	-0.294238	0.0652759	-4.5076	6.55637e-06	2.7173e-05
MAGI2-AS3	ENSG00000234456	lncRNA	132.441	0.790508	0.0873599	9.04887	1.44458e-19	3.52649e-18
AC004231.1	ENSG00000234477	lncRNA	11.666	-0.531075	0.175209	-3.0311	0.00243665	0.00633808
LNCTAM34A	ENSG00000234546	lncRNA	16.0917	-0.356297	0.0914052	-3.89799	9.69936e-05	0.000329334
MAPKAPK5-AS1	ENSG00000234608	lncRNA	774.797	-0.327791	0.0384076	-8.53455	1.40707e-17	2.68687e-16
AC053503.3	ENSG00000234638	lncRNA	11.0722	-1.03784	0.232829	-4.45754	8.29064e-06	3.38361e-05
ELF3-AS1	ENSG00000234678	lncRNA	114.802	-0.215407	0.0535742	-4.02072	5.80205e-05	0.000205395
EPCAM-DT	ENSG00000234690	lncRNA	33.2461	-0.355756	0.0873334	-4.07354	4.63037e-05	0.000166806
AL139289.1	ENSG00000234694	lncRNA	41.531	-0.535838	0.0833064	-6.43214	1.25823e-10	1.00273e-09
HMGA1P4	ENSG00000234705	lncRNA	13.2685	-0.576985	0.101808	-5.66736	1.45018e-08	8.82363e-08
GAS5	ENSG00000234741	lncRNA	7164.09	-0.582265	0.0633218	-9.19534	3.73818e-20	9.83531e-19
FOXP4-AS1	ENSG00000234753	lncRNA	87.6225	-0.279339	0.077121	-3.62209	0.000292233	0.000909311
AL611929.1	ENSG00000234768	lncRNA	1.49281	0.771587	0.269597	2.86201	0.00420968	0.0103954
SLC25A25-AS1	ENSG00000234771	lncRNA	1276.45	-0.385347	0.0631332	-6.1037	1.03638e-09	7.29779e-09
LINC01239	ENSG00000234840	lncRNA	4.33296	0.933828	0.271486	3.4397	0.00058237	0.00171455
AL021392.1	ENSG00000234869	lncRNA	9.74588	-0.286161	0.09665	-2.96079	0.00306848	0.00782084
SNHG20	ENSG00000234912	lncRNA	224.911	-0.167132	0.051308	-3.25743	0.00112427	0.00313857
AC016027.2	ENSG00000234913	lncRNA	1.52763	-0.596436	0.140277	-4.25183	2.12026e-05	8.08696e-05
AC098484.2	ENSG00000234917	lncRNA	5.501	-0.226952	0.0744944	-3.04656	0.00231476	0.00605396
LINC01659	ENSG00000234928	lncRNA	25.7672	-0.436795	0.169789	-2.57258	0.0100944	0.0227065
AC018685.2	ENSG00000234929	lncRNA	1.68734	0.67748	0.234016	2.89501	0.00379146	0.0094518
AC010883.1	ENSG00000234936	lncRNA	10.2193	-0.408622	0.0895663	-4.56223	5.06128e-06	2.1335e-05
AC104667.2	ENSG00000234949	lncRNA	42.4488	-0.312391	0.085455	-3.65562	0.000256558	0.000806708
AL133415.1	ENSG00000234961	lncRNA	7.64747	-0.327381	0.143527	-2.28097	0.0225503	0.0462065
SEMA3F-AS1	ENSG00000235016	lncRNA	40.6114	-0.178875	0.0645817	-2.76975	0.00560989	0.0134509
AC068580.3	ENSG00000235027	lncRNA	54.7256	-0.231664	0.0635805	-3.64363	0.00026882	0.000842286
MNX1-AS2	ENSG00000235029	lncRNA	15.7938	-0.220199	0.0841226	-2.61759	0.00885523	0.0202226
LINC00940	ENSG00000235049	lncRNA	10.8351	-0.4948	0.161774	-3.0586	0.00222376	0.00583314
AL357497.1	ENSG00000235051	lncRNA	0.682681	-0.669051	0.198983	-3.36235	0.000772825	0.00222472
AC073842.1	ENSG00000235077	lncRNA	3.8072	-0.57694	0.128762	-4.48067	7.44087e-06	3.05802e-05
FNDC1-IT1	ENSG00000235086	lncRNA	0.767716	0.728856	0.20339	3.58354	0.000338971	0.00104286
AL645504.1	ENSG00000235121	lncRNA	0.932872	0.507333	0.151543	3.34777	0.000814637	0.00233506
AC137630.2	ENSG00000235236	lncRNA	3.00843	-0.239687	0.0917499	-2.61239	0.00899104	0.0204945
AL360181.2	ENSG00000235245	lncRNA	26.8502	-0.365185	0.080676	-4.52656	5.99504e-06	2.49956e-05
ITGA9-AS1	ENSG00000235257	lncRNA	74.3191	-0.145718	0.0531304	-2.74264	0.00609473	0.014479
MCF2L-AS1	ENSG00000235280	lncRNA	182.941	-0.84802	0.0800356	-10.5955	3.12547e-26	1.69481e-24
LINC01281	ENSG00000235304	lncRNA	2.53677	0.667086	0.151356	4.4074	1.04618e-05	4.19537e-05
LINC00957	ENSG00000235314	lncRNA	82.8793	-0.269857	0.0742999	-3.632	0.000281231	0.000877291
AC114730.3	ENSG00000235351	lncRNA	10.3603	-0.339622	0.0924896	-3.67201	0.000240655	0.000759764
LINC01055	ENSG00000235366	lncRNA	2.03476	0.679933	0.152345	4.46312	8.07761e-06	3.30019e-05
AC016027.3	ENSG00000235445	lncRNA	0.428592	-0.690024	0.276355	-2.49688	0.0125291	0.0275289
UBE2R2-AS1	ENSG00000235481	lncRNA	8.8228	-0.994791	0.101938	-9.75882	1.69106e-22	5.9583e-21
JARID2-AS1	ENSG00000235488	lncRNA	3.35205	-0.292356	0.100999	-2.89464	0.00379593	0.00946049
AL135924.2	ENSG00000235523	lncRNA	2.22724	-0.810853	0.183569	-4.41716	1.00006e-05	4.02519e-05
AGAP1-IT1	ENSG00000235529	lncRNA	14.7428	-0.587618	0.104078	-5.64596	1.64259e-08	9.91387e-08
MSC-AS1	ENSG00000235531	lncRNA	68.4234	0.634896	0.0822871	7.71561	1.20401e-14	1.59543e-13
LINC00402	ENSG00000235532	lncRNA	2.74131	0.938241	0.181384	5.17267	2.30772e-07	1.1826e-06
AL445183.2	ENSG00000235563	lncRNA	6.53834	-0.905553	0.160362	-5.64694	1.63327e-08	9.86696e-08
LINC02651	ENSG00000235645	lncRNA	1.27845	-0.407081	0.159961	-2.54487	0.0109319	0.0243612
DICER1-AS1	ENSG00000235706	lncRNA	100.123	-0.308263	0.070074	-4.39911	1.08697e-05	4.34618e-05
LINC00607	ENSG00000235770	lncRNA	12.7479	1.6671	0.177424	9.39614	5.65997e-21	1.64045e-19
AF241728.1	ENSG00000235806	lncRNA	2.54008	0.743057	0.129451	5.74008	9.46342e-09	5.89694e-08
OLMALINC	ENSG00000235823	lncRNA	318.286	-0.215966	0.0598241	-3.61002	0.000306171	0.00094868
AF064858.1	ENSG00000235888	lncRNA	69.4972	-0.39272	0.134506	-2.91973	0.0035034	0.00881303
TSPEAR-AS1	ENSG00000235890	lncRNA	19.9844	-0.324176	0.134234	-2.41501	0.0157347	0.0336684
RBMS3-AS3	ENSG00000235904	lncRNA	0.79283	0.558478	0.168232	3.3197	0.00090114	0.00256093
ASH1L-AS1	ENSG00000235919	lncRNA	62.4822	-0.237296	0.0559795	-4.23898	2.24533e-05	8.52994e-05
LINC01553	ENSG00000235931	lncRNA	1.53274	-0.410699	0.142798	-2.87609	0.00402637	0.00998471
AL138760.1	ENSG00000235939	lncRNA	2.17872	-0.534795	0.16136	-3.3143	0.000918716	0.00260585
UBOX5-AS1	ENSG00000235958	lncRNA	9.19161	-0.270674	0.0821915	-3.29322	0.000990481	0.00279365
AC018816.1	ENSG00000235978	lncRNA	14.9914	-0.404951	0.100674	-4.02241	5.76047e-05	0.000203999
HGC6.3	ENSG00000235994	lncRNA	1.74876	-0.719721	0.267663	-2.68891	0.00716854	0.0167489
LINC01936	ENSG00000235997	lncRNA	8.01951	0.552385	0.0956047	5.7778	7.56828e-09	4.7736e-08
AC007731.3	ENSG00000236003	lncRNA	0.602917	-0.585564	0.231353	-2.53104	0.0113724	0.0252289
LINC01814	ENSG00000236008	lncRNA	75.3205	-0.168714	0.0654095	-2.57934	0.00989886	0.0223232
ASMTL-AS1	ENSG00000236017	lncRNA	104.121	-0.382284	0.0916578	-4.17078	3.03561e-05	0.000113009
ELFN1-AS1	ENSG00000236081	lncRNA	328.121	-0.741815	0.102488	-7.23804	4.55221e-13	4.916e-12
AC110995.1	ENSG00000236120	lncRNA	2.61502	0.91699	0.138576	6.61722	3.6602e-11	3.13524e-10
PRKX-AS1	ENSG00000236188	lncRNA	0.268771	-0.584438	0.22735	-2.57065	0.0101507	0.0228157
KDM4A-AS1	ENSG00000236200	lncRNA	26.7435	-0.156552	0.0576472	-2.7157	0.0066136	0.0155713
AC006369.1	ENSG00000236213	lncRNA	1.12	0.558284	0.163347	3.41779	0.000631328	0.00184716
SLC12A9-AS1	ENSG00000236305	lncRNA	38.6785	-0.547491	0.0810014	-6.75903	1.38914e-11	1.25783e-10
TRHDE-AS1	ENSG00000236333	lncRNA	2.04096	0.803629	0.241476	3.32799	0.000874762	0.00249209
AC084809.2	ENSG00000236377	lncRNA	4.18023	-0.492132	0.10885	-4.52118	6.14952e-06	2.5595e-05
LINC00479	ENSG00000236384	lncRNA	3.86137	-0.331845	0.14628	-2.26857	0.0232946	0.0475127
AL807752.4	ENSG00000236394	lncRNA	2.34133	-0.386138	0.140414	-2.74999	0.00595977	0.014191
LINC01134	ENSG00000236423	lncRNA	71.176	-0.398152	0.0876898	-4.54046	5.61317e-06	2.34982e-05
AC002401.1	ENSG00000236472	lncRNA	1.03968	-0.533393	0.168422	-3.16701	0.00154016	0.00417522
AC107081.1	ENSG00000236498	lncRNA	9.22302	-0.275889	0.076337	-3.61409	0.000301409	0.000935275
LINC00896	ENSG00000236499	lncRNA	35.7461	-0.463812	0.110652	-4.19163	2.76963e-05	0.000103794
AL035448.1	ENSG00000236526	lncRNA	2.90087	0.670076	0.118588	5.65046	1.6002e-08	9.68863e-08
AC093582.1	ENSG00000236529	lncRNA	3.37273	0.636499	0.1182	5.38491	7.24797e-08	4.00293e-07
PITPNA-AS1	ENSG00000236618	lncRNA	67.9548	-0.210186	0.0619157	-3.39471	0.000687012	0.00199664
AL133215.1	ENSG00000236662	lncRNA	5.16384	-0.381485	0.0949397	-4.01818	5.8649e-05	0.000207486
FRGCA	ENSG00000236663	lncRNA	6.45906	-0.420989	0.152272	-2.76472	0.00569711	0.0136318
LINC01010	ENSG00000236700	lncRNA	3.17896	0.817488	0.178286	4.58527	4.53404e-06	1.92527e-05
SDK1-AS1	ENSG00000236708	lncRNA	1.10056	0.669753	0.190781	3.51059	0.000447117	0.00134568
LINC01186	ENSG00000236751	lncRNA	11.2408	-0.286906	0.0889485	-3.22553	0.00125738	0.00347693
AC007666.1	ENSG00000236754	lncRNA	1.27205	-0.302131	0.118416	-2.55143	0.0107282	0.0239684
INTS6-AS1	ENSG00000236778	lncRNA	53.8393	-0.188883	0.072523	-2.60446	0.00920194	0.0209256
LINC01829	ENSG00000236780	lncRNA	1.89266	0.553638	0.182394	3.03541	0.00240211	0.0062591
ELOA-AS1	ENSG00000236810	lncRNA	35.9451	-0.163417	0.0582373	-2.80605	0.00501529	0.0121849
CBR3-AS1	ENSG00000236830	lncRNA	118.751	-0.202335	0.0583448	-3.46792	0.000524496	0.00155795
AC007750.1	ENSG00000236841	lncRNA	6.63388	0.640626	0.1355	4.72786	2.26903e-06	1.00746e-05
AP003774.2	ENSG00000236935	lncRNA	310.161	-0.326563	0.141322	-2.31078	0.0208451	0.04311
ZDHHC20-IT1	ENSG00000236953	lncRNA	7.32569	-0.633683	0.11376	-5.57037	2.54206e-08	1.4967e-07
AC245052.4	ENSG00000237017	lncRNA	31.5776	-0.344384	0.0638191	-5.39625	6.80463e-08	3.77498e-07
PRMT5-AS1	ENSG00000237054	lncRNA	14.624	-0.429241	0.0788802	-5.44168	5.27818e-08	2.97347e-07
EHMT2-AS1	ENSG00000237080	lncRNA	4.52247	-0.335497	0.10799	-3.10673	0.0018917	0.00503747
AC092809.4	ENSG00000237101	lncRNA	5.90656	-0.310571	0.0896673	-3.46359	0.000533022	0.00158095
HAND2-AS1	ENSG00000237125	lncRNA	25.8145	0.845046	0.159049	5.3131	1.07774e-07	5.80542e-07
ZNF503-AS2	ENSG00000237149	lncRNA	79.5454	-0.187704	0.0682987	-2.74828	0.00599079	0.0142579
LINC00987	ENSG00000237248	lncRNA	17.5135	0.592266	0.0765727	7.7347	1.03651e-14	1.38888e-13
LINC01732	ENSG00000237292	lncRNA	0.481727	-0.520222	0.219423	-2.37086	0.0177469	0.0374763
GS1-124K5.4	ENSG00000237310	lncRNA	42.1541	-0.504353	0.0735845	-6.85407	7.17791e-12	6.74046e-11
RAI1-AS1	ENSG00000237328	lncRNA	0.475867	-0.5694	0.230963	-2.46533	0.0136887	0.0298163
UNQ6494	ENSG00000237372	lncRNA	8.44564	-0.306541	0.109393	-2.80221	0.00507544	0.0123107
BRWD1-IT1	ENSG00000237373	lncRNA	0.232516	-0.756154	0.249329	-3.03275	0.00242336	0.00630693
CAMTA1-IT1	ENSG00000237402	lncRNA	1.31568	-0.855518	0.18512	-4.62144	3.81093e-06	1.63639e-05
FOXD2-AS1	ENSG00000237424	lncRNA	411.053	-0.283444	0.0693211	-4.08886	4.33497e-05	0.000156933
BX293535.1	ENSG00000237429	lncRNA	7.85437	-0.321037	0.116852	-2.74739	0.00600723	0.0142924
LINC01351	ENSG00000237457	lncRNA	1.3937	0.91921	0.323723	2.8395	0.00451848	0.0110793
LINC01637	ENSG00000237476	lncRNA	78.4958	-0.594633	0.0668017	-8.90146	5.51147e-19	1.2549e-17
AL117350.1	ENSG00000237481	lncRNA	1.84755	-0.300825	0.116939	-2.5725	0.0100966	0.0227102
LINC01684	ENSG00000237484	lncRNA	2.00591	0.749237	0.139811	5.35894	8.37126e-08	4.58686e-07
UNC5B-AS1	ENSG00000237512	lncRNA	16.5895	-1.42413	0.156762	-9.08466	1.04023e-19	2.59237e-18
AL391832.1	ENSG00000237520	lncRNA	1.38873	0.558562	0.129622	4.30918	1.63864e-05	6.35845e-05
AL138828.1	ENSG00000237596	lncRNA	1.45012	0.508743	0.191561	2.65578	0.0079125	0.018307
AC073257.2	ENSG00000237614	lncRNA	2.67057	-0.464704	0.149511	-3.10815	0.00188262	0.00501676
AL365226.1	ENSG00000237643	lncRNA	481.959	-0.499458	0.203594	-2.4532	0.0141592	0.0306994
HLCS-IT1	ENSG00000237646	lncRNA	0.715692	-0.495178	0.15881	-3.11806	0.00182044	0.00486431
AL109615.3	ENSG00000237686	lncRNA	68.5727	-0.296048	0.102928	-2.87625	0.0040243	0.00998086
AC079922.2	ENSG00000237753	lncRNA	53.0781	-0.187236	0.058037	-3.22615	0.00125469	0.00347024
LINC02631	ENSG00000237772	lncRNA	0.752525	-0.355389	0.156276	-2.27411	0.0229596	0.0469144
AC073332.1	ENSG00000237773	lncRNA	18.7032	-0.476497	0.0759107	-6.27707	3.45021e-10	2.58979e-09
AC022034.1	ENSG00000237807	lncRNA	22.0878	0.903436	0.113371	7.96886	1.60141e-15	2.36554e-14
CDK6-AS1	ENSG00000237819	lncRNA	1.99938	-0.392654	0.157749	-2.4891	0.0128067	0.0280679
PHKA2-AS1	ENSG00000237836	lncRNA	4.33859	-0.279793	0.090862	-3.07932	0.00207471	0.00547938
AL023584.2	ENSG00000237851	lncRNA	0.340126	-0.923495	0.254125	-3.63401	0.000279047	0.000871186
Z94160.1	ENSG00000237862	lncRNA	1.38094	-0.901301	0.295019	-3.05506	0.00225012	0.00589742
AC073130.1	ENSG00000237870	lncRNA	1.08693	0.655311	0.152528	4.29633	1.73647e-05	6.71424e-05
DGUOK-AS1	ENSG00000237883	lncRNA	53.6741	-0.319168	0.0649906	-4.911	9.06151e-07	4.26196e-06
NALT1	ENSG00000237886	lncRNA	23.0559	-0.607681	0.0976113	-6.22551	4.79977e-10	3.53819e-09
AC004000.1	ENSG00000237903	lncRNA	3.41538	-1.05168	0.138842	-7.57469	3.59991e-14	4.50477e-13
SIRPG-AS1	ENSG00000237914	lncRNA	1.36963	0.88309	0.188584	4.68274	2.83061e-06	1.23826e-05
AL357079.1	ENSG00000237950	lncRNA	17.0816	-0.193239	0.075858	-2.54738	0.0108535	0.0242106
AL627309.1	ENSG00000238009	lncRNA	0.823598	-0.979387	0.230435	-4.25016	2.13616e-05	8.13785e-05
AC009133.1	ENSG00000238045	lncRNA	300.883	-0.223169	0.0505785	-4.41234	1.02259e-05	4.10896e-05
ZEB2-AS1	ENSG00000238057	lncRNA	2.27244	0.693117	0.12222	5.67108	1.41898e-08	8.64068e-08
LINC01352	ENSG00000238078	lncRNA	1.46545	0.671405	0.148478	4.52191	6.12836e-06	2.5518e-05
LINC02806	ENSG00000238107	lncRNA	1.55461	-0.572313	0.196249	-2.91625	0.00354262	0.00889647
LINC01410	ENSG00000238113	lncRNA	30.6486	0.813769	0.104759	7.76804	7.9712e-15	1.08484e-13
AC104170.1	ENSG00000238140	lncRNA	1.35544	-0.28466	0.109534	-2.59883	0.00935425	0.0212266
TNFRSF14-AS1	ENSG00000238164	lncRNA	398.409	-0.404347	0.0733632	-5.51158	3.55627e-08	2.05242e-07
AL513320.1	ENSG00000238260	lncRNA	9.85852	-0.339318	0.0918589	-3.6939	0.000220837	0.000703064
LINC00707	ENSG00000238266	lncRNA	1.24085	0.67638	0.19879	3.40248	0.000667767	0.00194588
BX470102.1	ENSG00000238279	lncRNA	94.4291	-0.909032	0.0928633	-9.78893	1.25621e-22	4.47148e-21
AL034417.2	ENSG00000238290	lncRNA	5.14557	-0.508416	0.103746	-4.90059	9.555e-07	4.48359e-06
AP001469.3	ENSG00000239415	lncRNA	75.519	-0.208628	0.0604451	-3.45154	0.0005574	0.00164573
AC007405.3	ENSG00000239467	lncRNA	70.267	-0.260934	0.0919209	-2.83869	0.00452998	0.0111046
MYLK-AS1	ENSG00000239523	lncRNA	17.7671	-0.419224	0.0744752	-5.62904	1.81214e-08	1.08754e-07
KMT2E-AS1	ENSG00000239569	lncRNA	91.0126	-0.537388	0.0642606	-8.36264	6.13276e-17	1.07892e-15
PSMD6-AS2	ENSG00000239653	lncRNA	9.15519	0.52146	0.0761773	6.84534	7.62936e-12	7.13286e-11
PRKAG2-AS1	ENSG00000239911	lncRNA	66.848	-0.327178	0.118733	-2.75557	0.00585905	0.0139773
AP001625.3	ENSG00000239930	lncRNA	0.924068	-0.371355	0.156527	-2.37247	0.0176696	0.0373427
STIM2-AS1	ENSG00000240005	lncRNA	8.02998	-0.540705	0.10283	-5.25825	1.45431e-07	7.67064e-07
LINC02004	ENSG00000240006	lncRNA	1.7069	-0.510496	0.185411	-2.75333	0.00589932	0.014061
LNCSRLR	ENSG00000240032	lncRNA	2.53463	0.535669	0.111405	4.80831	1.52211e-06	6.93137e-06
AC244205.1	ENSG00000240040	lncRNA	3.03697	0.632907	0.165162	3.83204	0.000127084	0.000423196
AC012358.3	ENSG00000240401	lncRNA	11.5444	-0.283969	0.105545	-2.6905	0.00713448	0.0166826
SAMMSON	ENSG00000240405	lncRNA	0.690074	0.774288	0.270412	2.86337	0.00419166	0.0103536
TM4SF1-AS1	ENSG00000240541	lncRNA	12.8841	-0.269647	0.103641	-2.60175	0.00927503	0.021068
AL096701.3	ENSG00000240591	lncRNA	3.78575	-0.216519	0.0881174	-2.45717	0.0140036	0.0304018
AL512306.3	ENSG00000240710	lncRNA	1.36958	0.857799	0.172847	4.96275	6.95021e-07	3.32999e-06
NDUFB2-AS1	ENSG00000240889	lncRNA	38.23	-0.348177	0.0508849	-6.84244	7.78573e-12	7.27194e-11
PRICKLE2-AS1	ENSG00000241111	lncRNA	0.75366	0.519955	0.17903	2.90429	0.0036809	0.00920382
ADAMTS9-AS1	ENSG00000241158	lncRNA	9.94543	0.8374	0.148442	5.64124	1.68828e-08	1.01752e-07
LINC00877	ENSG00000241163	lncRNA	6.01013	0.54498	0.114184	4.77284	1.81644e-06	8.18585e-06
LINC02614	ENSG00000241288	lncRNA	80.0402	-0.173191	0.0717473	-2.4139	0.0157829	0.0337546
AC093010.1	ENSG00000241490	lncRNA	0.69407	0.885921	0.194383	4.5576	5.17415e-06	2.1782e-05
LINC02029	ENSG00000241544	lncRNA	1.42068	-0.472215	0.141739	-3.33159	0.000863517	0.00246427
ADAMTS9-AS2	ENSG00000241684	lncRNA	5.82652	0.627529	0.116462	5.38828	7.11335e-08	3.93256e-07
XACT	ENSG00000241743	lncRNA	0.794123	-0.65144	0.275934	-2.36086	0.0182328	0.038359
AC002467.1	ENSG00000241764	lncRNA	68.2925	-0.244611	0.0489218	-5.00004	5.73182e-07	2.78144e-06
AC092620.1	ENSG00000241772	lncRNA	0.361501	-0.770672	0.263391	-2.92596	0.00343397	0.00865489
PRR34-AS1	ENSG00000241990	lncRNA	116.267	-0.349909	0.0632608	-5.53121	3.18022e-08	1.84909e-07
AC093583.1	ENSG00000242048	lncRNA	1.88462	0.761995	0.152291	5.00356	5.62806e-07	2.73352e-06
AC084864.1	ENSG00000242078	lncRNA	2.08881	-0.351628	0.139621	-2.51844	0.0117874	0.0260611
SNHG3	ENSG00000242125	lncRNA	1340.37	-0.297242	0.0616611	-4.82058	1.43141e-06	6.54562e-06
AC096536.2	ENSG00000242396	lncRNA	8.36706	-0.289289	0.0749142	-3.86161	0.000112642	0.0003781
AC108010.1	ENSG00000242588	lncRNA	42.5014	0.519559	0.0844675	6.151	7.69972e-10	5.52256e-09
AC006148.1	ENSG00000242593	lncRNA	0.559912	-0.952551	0.420243	-2.26667	0.0234106	0.0477135
AC093627.6	ENSG00000242611	lncRNA	2.84293	0.541674	0.168443	3.21577	0.00130097	0.00358656
AC007849.1	ENSG00000242795	lncRNA	0.825454	-0.999552	0.217657	-4.59233	4.38327e-06	1.8656e-05
AL162431.1	ENSG00000243155	lncRNA	25.2308	-0.223955	0.0794335	-2.8194	0.00481131	0.0117408
AC107021.1	ENSG00000243415	lncRNA	1.60703	0.736631	0.141504	5.20573	1.93231e-07	1.00054e-06
MNX1-AS1	ENSG00000243479	lncRNA	151.882	-0.471799	0.0673867	-7.00137	2.53471e-12	2.50192e-11
AC021074.3	ENSG00000243818	lncRNA	0.39098	-0.756156	0.292307	-2.58686	0.0096856	0.0218888
TIPARP-AS1	ENSG00000243926	lncRNA	27.5697	-0.378271	0.0764044	-4.95091	7.38686e-07	3.52902e-06
AC073320.1	ENSG00000244036	lncRNA	0.947315	-0.461268	0.147112	-3.13549	0.00171565	0.00460587
IL12A-AS1	ENSG00000244040	lncRNA	2.71868	0.77045	0.117606	6.55113	5.71019e-11	4.77774e-10
AC010973.2	ENSG00000244151	lncRNA	35.7378	-0.490135	0.0733052	-6.68622	2.29009e-11	2.01028e-10
AC091153.3	ENSG00000244184	lncRNA	7.80471	-0.294826	0.09309	-3.16711	0.00153964	0.00417468
AC007009.1	ENSG00000244239	lncRNA	2.65096	-1.72244	0.360914	-4.77246	1.81992e-06	8.19961e-06
GATA2-AS1	ENSG00000244300	lncRNA	152.984	-0.513355	0.114319	-4.49056	7.10371e-06	2.92985e-05
AC093904.3	ENSG00000244310	lncRNA	2.11337	-0.653298	0.179833	-3.6328	0.000280364	0.000875014
FAM3D-AS1	ENSG00000244383	lncRNA	14.0102	-0.365019	0.12011	-3.03904	0.00237334	0.00619067
AC147067.1	ENSG00000244459	lncRNA	22.8145	-0.379989	0.0949023	-4.004	6.22791e-05	0.000219253
AL021707.5	ENSG00000244491	lncRNA	3.14225	-0.851726	0.141713	-6.01022	1.85271e-09	1.26749e-08
KCNK15-AS1	ENSG00000244558	lncRNA	8.06489	-0.404312	0.174903	-2.31163	0.0207978	0.0430239
PRICKLE2-DT	ENSG00000244564	lncRNA	1.25791	0.716682	0.151311	4.73649	2.17455e-06	9.69117e-06
AC246787.2	ENSG00000244620	lncRNA	1.29736	0.65431	0.205776	3.17972	0.00147416	0.00401479
MIATNB	ENSG00000244625	lncRNA	76.3815	-0.109883	0.0430839	-2.55045	0.0107585	0.0240251
LIFR-AS1	ENSG00000244968	lncRNA	3.83128	0.608294	0.12148	5.00734	5.51867e-07	2.68585e-06
IGFBP7-AS1	ENSG00000245067	lncRNA	14.9664	-1.5192	0.182367	-8.33043	8.05464e-17	1.3952e-15
SMARCA5-AS1	ENSG00000245112	lncRNA	1.70113	-0.58602	0.156944	-3.73395	0.000188497	0.00060785
LINC00861	ENSG00000245164	lncRNA	23.0484	1.11895	0.117923	9.4888	2.33703e-21	7.05432e-20
AC105285.1	ENSG00000245213	lncRNA	30.9566	-0.144543	0.0567905	-2.5452	0.0109214	0.0243421
USP2-AS1	ENSG00000245248	lncRNA	59.4465	-0.277475	0.0913972	-3.03593	0.00239796	0.00624977
H2AZ1-DT	ENSG00000245322	lncRNA	1.8619	-0.584167	0.138155	-4.22834	2.35426e-05	8.91365e-05
AP005717.1	ENSG00000245330	lncRNA	4.77431	-0.409275	0.0984519	-4.15711	3.22296e-05	0.000119564
NEAT1	ENSG00000245532	lncRNA	10624.7	-0.185959	0.0796427	-2.33492	0.0195479	0.0407445
SCAMP1-AS1	ENSG00000245556	lncRNA	199.803	-0.192986	0.0508046	-3.79859	0.00014552	0.000478917
SNHG6	ENSG00000245910	lncRNA	2490.88	-0.317736	0.0560226	-5.67156	1.41501e-08	8.61926e-08
AP003352.1	ENSG00000245970	lncRNA	155.117	-0.402219	0.0672701	-5.97917	2.24274e-09	1.51748e-08
ALDH1L1-AS2	ENSG00000246022	lncRNA	5.08177	-0.66162	0.218458	-3.02859	0.00245697	0.00638832
LINC02325	ENSG00000246084	lncRNA	1.44935	0.678522	0.157127	4.31832	1.57224e-05	6.11696e-05
AC016065.1	ENSG00000246089	lncRNA	140.241	-0.284077	0.0547715	-5.18658	2.14188e-07	1.10264e-06
LINC00900	ENSG00000246100	lncRNA	15.4256	0.50458	0.0950435	5.30894	1.10267e-07	5.92551e-07
PRR7-AS1	ENSG00000246334	lncRNA	29.7807	-0.430479	0.0793542	-5.42478	5.80275e-08	3.24697e-07
AC040168.1	ENSG00000246379	lncRNA	1.87731	0.933474	0.153103	6.09704	1.08053e-09	7.59194e-09
LINC00968	ENSG00000246430	lncRNA	4.09374	0.786643	0.145416	5.40961	6.31617e-08	3.51881e-07
LINC02481	ENSG00000246526	lncRNA	30.5717	-0.254603	0.0711749	-3.57715	0.000347364	0.00106653
AC100861.1	ENSG00000246582	lncRNA	146.195	-0.279988	0.0551895	-5.07321	3.91167e-07	1.94156e-06
CACNA1C-AS1	ENSG00000246627	lncRNA	12.0896	-0.252784	0.104541	-2.41803	0.015605	0.0334321
AP000487.1	ENSG00000246889	lncRNA	26.0194	-0.122445	0.0504148	-2.42875	0.0151508	0.0325887
SOCS2-AS1	ENSG00000246985	lncRNA	34.4602	-0.17351	0.0752202	-2.3067	0.0210716	0.0435243
SNHG10	ENSG00000247092	lncRNA	159.903	-0.258732	0.0583271	-4.43587	9.17012e-06	3.714e-05
MIR210HG	ENSG00000247095	lncRNA	259.212	-0.643525	0.0882349	-7.29331	3.02423e-13	3.35014e-12
AC009060.1	ENSG00000247228	lncRNA	0.569155	-0.546142	0.208456	-2.61993	0.00879466	0.0201011
LY6E-DT	ENSG00000247317	lncRNA	9.57064	-0.337994	0.132899	-2.54324	0.0109829	0.0244648
TMED2-DT	ENSG00000247373	lncRNA	94.532	-0.254849	0.0575039	-4.43185	9.34283e-06	3.77715e-05
GPRC5D-AS1	ENSG00000247498	lncRNA	143.345	-0.153374	0.0547155	-2.80311	0.00506121	0.0122824
MIR4458HG	ENSG00000247516	lncRNA	151.189	-0.248583	0.0926495	-2.68304	0.00729558	0.0170239
FABP6-AS1	ENSG00000247699	lncRNA	1.51655	-0.462267	0.191094	-2.41906	0.0155608	0.0333562
TMEM161B-AS1	ENSG00000247828	lncRNA	165.344	-0.198144	0.0570715	-3.47186	0.000516869	0.00153758
AC021086.1	ENSG00000247877	lncRNA	1.58084	0.532724	0.127645	4.1735	2.99957e-05	0.000111754
SEC24B-AS1	ENSG00000247950	lncRNA	20.6717	-0.151197	0.0583517	-2.59113	0.00956624	0.0216506
UBA6-AS1	ENSG00000248049	lncRNA	160.729	-0.0959995	0.0409909	-2.34197	0.0191823	0.0400984
AC098487.1	ENSG00000248161	lncRNA	18.1526	-0.268693	0.0797952	-3.36728	0.000759147	0.00218798
AC078850.1	ENSG00000248187	lncRNA	2.2889	0.633302	0.170659	3.71093	0.000206499	0.000661051
TRPC7-AS1	ENSG00000248211	lncRNA	6.74593	-0.328367	0.130199	-2.52203	0.011668	0.0258284
TRIM52-AS1	ENSG00000248275	lncRNA	188.514	-0.382261	0.049366	-7.74341	9.67857e-15	1.30145e-13
MEF2C-AS1	ENSG00000248309	lncRNA	3.60252	0.678502	0.128399	5.28434	1.26158e-07	6.7242e-07
LINC00504	ENSG00000248360	lncRNA	1.17509	0.699839	0.17538	3.99042	6.59576e-05	0.000230927
AC008610.1	ENSG00000248367	lncRNA	23.1587	-0.351451	0.0841665	-4.17566	2.97125e-05	0.000110785
AC107464.1	ENSG00000248416	lncRNA	1.03973	-0.510424	0.185871	-2.74612	0.0060305	0.0143432
LINC01197	ENSG00000248441	lncRNA	12.7306	0.615197	0.0997008	6.17043	6.81028e-10	4.9197e-09
AL139147.1	ENSG00000248458	lncRNA	1.1575	0.864886	0.168493	5.13307	2.85058e-07	1.44395e-06
FGF10-AS1	ENSG00000248464	lncRNA	0.639143	0.563576	0.184939	3.04736	0.00230862	0.00603999
LINC01962	ENSG00000248473	lncRNA	1.36549	-0.805217	0.143498	-5.61133	2.00776e-08	1.19929e-07
LINC02062	ENSG00000248489	lncRNA	7.36658	-0.198241	0.0809964	-2.44753	0.0143838	0.0311439
AC106882.1	ENSG00000248571	lncRNA	2.52976	0.529192	0.16272	3.25216	0.00114532	0.00319199
AC126768.1	ENSG00000248597	lncRNA	0.85251	-0.877535	0.321655	-2.72819	0.00636831	0.0150569
AC083902.1	ENSG00000248676	lncRNA	0.619609	-0.707071	0.309258	-2.28635	0.0222339	0.0456243
AC092903.2	ENSG00000248787	lncRNA	3.49874	-0.331776	0.108432	-3.05976	0.00221517	0.0058134
C8orf34-AS1	ENSG00000248801	lncRNA	2.79453	-0.981803	0.289824	-3.38758	0.000705117	0.00204397
AC114284.1	ENSG00000248927	lncRNA	5.17599	0.839921	0.105456	7.96466	1.65678e-15	2.44262e-14
SPCS3-AS1	ENSG00000248980	lncRNA	0.32561	-0.879984	0.315349	-2.79051	0.00526248	0.0127112
AL691482.3	ENSG00000249007	lncRNA	166.925	-0.594865	0.0933529	-6.37222	1.86315e-10	1.45064e-09
CLMAT3	ENSG00000249035	lncRNA	9.38372	-1.36339	0.184536	-7.38818	1.48847e-13	1.71704e-12
C5orf66-AS1	ENSG00000249082	lncRNA	9.65627	-0.951249	0.123006	-7.73335	1.04754e-14	1.4012e-13
AC140125.2	ENSG00000249109	lncRNA	0.511064	-0.529202	0.207706	-2.54784	0.0108391	0.0241811
AC020900.1	ENSG00000249180	lncRNA	2.11869	-0.490719	0.148156	-3.31218	0.000925734	0.00262439
AC079921.1	ENSG00000249207	lncRNA	1.69897	0.690888	0.1242	5.56273	2.65592e-08	1.56085e-07
LINC01411	ENSG00000249306	lncRNA	76.1681	-0.468906	0.207388	-2.26101	0.0237588	0.0483485
ADAMTS19-AS1	ENSG00000249421	lncRNA	2.5046	-0.633069	0.252668	-2.50554	0.0122265	0.0269244
LINC01258	ENSG00000249534	lncRNA	1.24023	-0.375671	0.149254	-2.51699	0.0118362	0.0261547
AC011405.1	ENSG00000249593	lncRNA	3.29561	-0.37509	0.102936	-3.6439	0.000268533	0.000841456
LINC00942	ENSG00000249628	lncRNA	11.5458	-0.492454	0.140471	-3.50573	0.00045535	0.00136884
AC008438.1	ENSG00000249637	lncRNA	17.6761	-0.26458	0.0560691	-4.71882	2.37222e-06	1.05011e-05
C5orf66-AS2	ENSG00000249647	lncRNA	0.479557	-0.951715	0.300924	-3.16264	0.00156346	0.00423238
NOP14-AS1	ENSG00000249673	lncRNA	293.088	-0.226356	0.042968	-5.26802	1.37902e-07	7.29568e-07
AC106897.1	ENSG00000249679	lncRNA	3.84928	-0.374823	0.119732	-3.1305	0.00174508	0.00467896
AC106795.2	ENSG00000249684	lncRNA	9.72908	-0.324676	0.0998941	-3.2502	0.00115325	0.00321268
AC079921.2	ENSG00000249685	lncRNA	2.42304	0.698906	0.113052	6.18216	6.32302e-10	4.58329e-09
AC110813.1	ENSG00000249690	lncRNA	1.51515	0.958517	0.20702	4.63006	3.6556e-06	1.57467e-05
AC008494.2	ENSG00000249791	lncRNA	1.26074	0.583565	0.137273	4.25114	2.12684e-05	8.10961e-05
VCAN-AS1	ENSG00000249835	lncRNA	0.402577	0.686025	0.250153	2.74242	0.00609886	0.014487
PVT1	ENSG00000249859	lncRNA	502.74	-0.248092	0.061241	-4.05108	5.09815e-05	0.000182369
ARHGEF38-IT1	ENSG00000249885	lncRNA	4.86879	-0.498243	0.108352	-4.59838	4.25784e-06	1.81524e-05
AC022272.1	ENSG00000250027	lncRNA	2.57076	0.514805	0.100513	5.12176	3.02694e-07	1.52782e-06
AC069360.1	ENSG00000250041	lncRNA	1.34557	0.573938	0.147592	3.88867	0.000100794	0.000341387
LINC01018	ENSG00000250056	lncRNA	5.78626	0.774563	0.203527	3.8057	0.000141402	0.00046669
AC011379.1	ENSG00000250069	lncRNA	2.35245	-0.538338	0.132753	-4.05518	5.00949e-05	0.000179365
AP000866.2	ENSG00000250073	lncRNA	24.049	-0.228566	0.081161	-2.81621	0.00485944	0.0118431
AC109927.1	ENSG00000250195	lncRNA	0.382596	-0.55516	0.197309	-2.81365	0.00489821	0.0119323
AC008443.4	ENSG00000250222	lncRNA	24.3546	-0.494934	0.0778368	-6.35861	2.03582e-10	1.57897e-09
AC021491.2	ENSG00000250286	lncRNA	5.57472	-0.403813	0.106305	-3.79863	0.000145498	0.000478885
LINC02762	ENSG00000250303	lncRNA	58.2536	-0.345503	0.0656078	-5.2662	1.3928e-07	7.36451e-07
AP006623.1	ENSG00000250397	lncRNA	11.9931	-0.303941	0.109148	-2.78466	0.00535843	0.0129135
AC109811.1	ENSG00000250406	lncRNA	0.314635	-0.668234	0.284802	-2.34631	0.0189601	0.0397056
FAM218A	ENSG00000250486	lncRNA	3.85898	0.516794	0.149217	3.46337	0.000533461	0.00158213
AP004147.1	ENSG00000250493	lncRNA	0.485519	-0.773103	0.287235	-2.69154	0.00711235	0.016636
AC034213.1	ENSG00000250509	lncRNA	2.33482	-0.554658	0.181502	-3.05594	0.00224354	0.00588138
MIR583HG	ENSG00000250551	lncRNA	0.821702	-0.490074	0.151978	-3.22463	0.00126136	0.00348615
LINC01511	ENSG00000250584	lncRNA	11.5	-0.890029	0.20344	-4.37489	1.21491e-05	4.82343e-05
AP001363.1	ENSG00000250659	lncRNA	1.16274	-0.34746	0.153098	-2.26952	0.0232366	0.0474089
AC111000.4	ENSG00000250696	lncRNA	0.95832	1.03484	0.230496	4.48964	7.13431e-06	2.94088e-05
AC025178.1	ENSG00000250764	lncRNA	6.08123	-0.284263	0.0827308	-3.436	0.000590371	0.00173597
SNHG18	ENSG00000250786	lncRNA	911.959	-0.220989	0.0738579	-2.99208	0.00277084	0.00711919
AC137770.1	ENSG00000250842	lncRNA	2.21002	-0.382269	0.130521	-2.92878	0.0034029	0.00858471
AC008443.5	ENSG00000250900	lncRNA	3.21672	-0.536005	0.133626	-4.01124	6.04014e-05	0.000213114
GMDS-DT	ENSG00000250903	lncRNA	150.132	-0.149361	0.0495448	-3.01466	0.00257265	0.00665651
AL035458.2	ENSG00000250917	lncRNA	11.984	-0.519434	0.102457	-5.06979	3.98265e-07	1.97423e-06
AC110772.2	ENSG00000250971	lncRNA	19.3487	-0.646148	0.267486	-2.41563	0.015708	0.0336207
SNHG21	ENSG00000250988	lncRNA	33.6756	-0.407953	0.0638219	-6.39206	1.63668e-10	1.28346e-09
AC136604.2	ENSG00000250999	lncRNA	6.92989	-0.272643	0.0752694	-3.62223	0.000292076	0.000908894
AC244502.1	ENSG00000251002	lncRNA	9.41226	0.617034	0.14744	4.18499	2.8518e-05	0.000106654
SLC25A30-AS1	ENSG00000251015	lncRNA	4.35373	-0.615831	0.101535	-6.06524	1.31758e-09	9.17815e-09
AC132803.1	ENSG00000251031	lncRNA	0.861247	-0.573698	0.183292	-3.12996	0.0017483	0.00468628
LINC02506	ENSG00000251129	lncRNA	0.641916	1.47246	0.426018	3.45632	0.000547604	0.00161981
LINC01843	ENSG00000251169	lncRNA	203.186	-0.342223	0.069765	-4.90537	9.32526e-07	4.38113e-06
AC105345.2	ENSG00000251186	lncRNA	0.556521	-0.557739	0.173746	-3.21008	0.00132698	0.00365062
LINC00589	ENSG00000251191	lncRNA	9.10152	-0.522892	0.143621	-3.64077	0.000271823	0.000850717
CNOT10-AS1	ENSG00000251224	lncRNA	0.396157	-0.578198	0.240801	-2.40115	0.0163438	0.0348354
LINC02714	ENSG00000251226	lncRNA	1.17252	0.654584	0.22976	2.84899	0.00438585	0.0107899
AC026704.1	ENSG00000251307	lncRNA	14.6572	-0.362129	0.0831274	-4.35631	1.32271e-05	5.21567e-05
AC008592.3	ENSG00000251409	lncRNA	0.537643	-0.43124	0.182233	-2.36643	0.0179606	0.0378823
LINC02615	ENSG00000251432	lncRNA	40.1352	-0.302506	0.0809195	-3.73836	0.000185227	0.000598213
PITPNM2-AS1	ENSG00000251497	lncRNA	1.68266	-0.965599	0.205243	-4.70465	2.54298e-06	1.12154e-05
MALAT1	ENSG00000251562	lncRNA	7868.25	-0.263918	0.116772	-2.26012	0.0238139	0.0484452
AC099520.1	ENSG00000251574	lncRNA	1.12242	0.526504	0.233497	2.25486	0.024142	0.0490162
LINC02482	ENSG00000251580	lncRNA	29.7807	-0.200859	0.0863854	-2.32516	0.0200636	0.0417013
LINC02754	ENSG00000251637	lncRNA	31.8307	-0.225865	0.0895632	-2.52185	0.0116739	0.0258384
AC005920.3	ENSG00000251665	lncRNA	2.33215	-0.340397	0.109389	-3.1118	0.0018595	0.00495938
AC004707.1	ENSG00000253102	lncRNA	3.3032	-0.315801	0.118331	-2.6688	0.00761226	0.0176937
AC009630.1	ENSG00000253133	lncRNA	2.89044	-0.280358	0.101044	-2.77462	0.00552658	0.0132761
LINC01605	ENSG00000253161	lncRNA	90.3401	-0.220834	0.0938154	-2.35392	0.0185768	0.0389968
AC009630.2	ENSG00000253174	lncRNA	0.871188	0.530287	0.149738	3.54144	0.000397953	0.00120952
AC092828.1	ENSG00000253284	lncRNA	6.24711	-0.506355	0.100349	-5.04592	4.51341e-07	2.21981e-06
STAU2-AS1	ENSG00000253302	lncRNA	3.58515	-0.264929	0.0959897	-2.75997	0.0057807	0.0138136
AC011676.1	ENSG00000253307	lncRNA	6.64772	-0.394923	0.0963697	-4.098	4.16736e-05	0.000151324
AC004080.1	ENSG00000253308	lncRNA	16.5097	-0.591139	0.201841	-2.92874	0.00340343	0.00858471
AC124067.2	ENSG00000253414	lncRNA	114.868	-0.488172	0.105227	-4.63923	3.49708e-06	1.5113e-05
LINC02159	ENSG00000253417	lncRNA	12.017	-0.556525	0.160107	-3.47597	0.000509011	0.00151644
AC012213.1	ENSG00000253477	lncRNA	0.847256	1.03609	0.415056	2.49626	0.012551	0.0275723
LINC02099	ENSG00000253490	lncRNA	3.54419	0.60026	0.125039	4.80057	1.58217e-06	7.19288e-06
AC004080.2	ENSG00000253508	lncRNA	48.0114	-0.530955	0.109154	-4.86429	1.14869e-06	5.32861e-06
AC100849.1	ENSG00000253557	lncRNA	0.710399	0.56862	0.166101	3.42333	0.000618586	0.0018121
AC025871.1	ENSG00000253567	lncRNA	0.365543	-0.524801	0.224447	-2.33819	0.0193772	0.0404395
AP003351.1	ENSG00000253585	lncRNA	3.78058	-0.328855	0.13505	-2.43505	0.0148896	0.0320991
LINC01300	ENSG00000253595	lncRNA	0.776118	-0.555838	0.227133	-2.44719	0.0143973	0.0311644
KCNIP1-OT1	ENSG00000253647	lncRNA	0.378494	0.744104	0.254506	2.92372	0.00345874	0.00871041
ZFHX4-AS1	ENSG00000253661	lncRNA	2.65632	0.781442	0.186333	4.19379	2.74326e-05	0.000102876
KBTBD11-OT1	ENSG00000253696	lncRNA	16.5341	-0.426308	0.0870897	-4.89505	9.82812e-07	4.60158e-06
AC011632.1	ENSG00000253706	lncRNA	1.3714	0.9937	0.275085	3.61233	0.000303457	0.000940941
MINCR	ENSG00000253716	lncRNA	194.954	-0.4984	0.071949	-6.92712	4.29488e-12	4.13574e-11
AC019257.1	ENSG00000253764	lncRNA	13.4989	-0.37631	0.100264	-3.75321	0.000174584	0.000567241
C8orf37-AS1	ENSG00000253773	lncRNA	3.37255	-0.294223	0.125541	-2.34363	0.019097	0.039955
AC090796.1	ENSG00000253821	lncRNA	0.402675	0.527557	0.228092	2.31291	0.0207275	0.0428969
AC007991.2	ENSG00000253838	lncRNA	1.55421	0.976382	0.226891	4.30331	1.68263e-05	6.5212e-05
AC064807.2	ENSG00000253844	lncRNA	16.6204	-0.685801	0.144574	-4.7436	2.09956e-06	9.37662e-06
AC023202.1	ENSG00000253891	lncRNA	0.574083	0.626697	0.181907	3.44516	0.000570724	0.00168273
LINC01419	ENSG00000253898	lncRNA	1.39455	1.37922	0.309125	4.46171	8.1309e-06	3.32019e-05
AC027117.2	ENSG00000253944	lncRNA	1.74412	-0.33058	0.140297	-2.35629	0.0184586	0.0387743
AC100810.1	ENSG00000253982	lncRNA	150.517	-0.19108	0.0516252	-3.7013	0.000214497	0.00068436
AC003991.2	ENSG00000254003	lncRNA	11.3406	-1.18636	0.144388	-8.21647	2.0958e-16	3.46242e-15
AC011365.1	ENSG00000254042	lncRNA	6.46393	-0.431604	0.142587	-3.02694	0.0024704	0.00642062
AC087273.2	ENSG00000254054	lncRNA	1.17261	-0.620121	0.221602	-2.79835	0.00513638	0.0124435
AC078852.2	ENSG00000254094	lncRNA	1.52871	-0.546113	0.151401	-3.60707	0.00030968	0.000958216
AC090136.3	ENSG00000254102	lncRNA	2.42038	0.85696	0.126586	6.7698	1.28957e-11	1.17378e-10
RBPMS-AS1	ENSG00000254109	lncRNA	24.3375	-0.235732	0.0908719	-2.59411	0.00948356	0.021483
AC108449.1	ENSG00000254129	lncRNA	0.719547	-0.514478	0.169434	-3.03646	0.00239376	0.00623924
AC009812.3	ENSG00000254162	lncRNA	7.70827	0.529107	0.0984471	5.37454	7.67805e-08	4.22519e-07
AC022034.4	ENSG00000254204	lncRNA	0.595718	0.893655	0.205862	4.34103	1.41814e-05	5.56554e-05
AC100797.1	ENSG00000254207	lncRNA	1.48889	-0.481405	0.167174	-2.87967	0.00398093	0.00988356
AC037459.3	ENSG00000254230	lncRNA	0.317213	-0.545022	0.19314	-2.8219	0.00477397	0.0116571
AC087354.1	ENSG00000254258	lncRNA	0.309647	-0.723044	0.265754	-2.72073	0.00651388	0.015363
AL355432.1	ENSG00000254396	lncRNA	0.927983	0.538743	0.164801	3.26904	0.00107912	0.00302292
AC084083.1	ENSG00000254431	lncRNA	2.68583	-0.412879	0.149921	-2.75399	0.00588741	0.0140342
AC113143.1	ENSG00000254432	lncRNA	1.30921	-0.786255	0.164798	-4.77104	1.83281e-06	8.25575e-06
LINC02683	ENSG00000254438	lncRNA	0.41884	-0.866521	0.383658	-2.25858	0.0239098	0.048617
AP002812.2	ENSG00000254459	lncRNA	2.43495	-0.629994	0.133216	-4.72913	2.25484e-06	1.00186e-05
LINC02749	ENSG00000254480	lncRNA	4.77524	-0.27828	0.116368	-2.39138	0.016785	0.0356624
AP002336.1	ENSG00000254484	lncRNA	0.608864	-0.409642	0.178176	-2.29909	0.0214998	0.0443129
AP003068.1	ENSG00000254501	lncRNA	18.15	-0.488471	0.0739976	-6.60117	4.0792e-11	3.47082e-10
AP001107.5	ENSG00000254510	lncRNA	6.87142	0.580578	0.12799	4.53611	5.73014e-06	2.39486e-05
AP000757.1	ENSG00000254528	lncRNA	10.1528	-0.384778	0.107294	-3.58621	0.000335525	0.00103259
FLJ20021	ENSG00000254531	lncRNA	145.501	-0.732622	0.0661736	-11.0712	1.7304e-28	1.23417e-26
AP003032.1	ENSG00000254675	lncRNA	4.17109	-0.495075	0.113383	-4.36638	1.26324e-05	4.99611e-05
AP002387.1	ENSG00000254682	lncRNA	154.278	-0.657526	0.0792205	-8.29995	1.04154e-16	1.77914e-15
AL157756.1	ENSG00000254718	lncRNA	5.59343	-0.423523	0.0929594	-4.556	5.21368e-06	2.19315e-05
AP003396.3	ENSG00000254740	lncRNA	0.377499	-0.744688	0.294229	-2.53099	0.0113743	0.0252307
AP001107.6	ENSG00000254756	lncRNA	3.47647	-0.30687	0.10157	-3.02128	0.00251711	0.00653003
AC022182.1	ENSG00000254777	lncRNA	7.96384	-0.326484	0.105511	-3.09431	0.00197273	0.00523354
FAR1-IT1	ENSG00000254791	lncRNA	0.864012	-0.672342	0.194448	-3.4577	0.000544813	0.00161292
AP001189.3	ENSG00000254810	lncRNA	13.3036	0.603803	0.106307	5.67982	1.34837e-08	8.23171e-08
LMNTD2-AS1	ENSG00000254815	lncRNA	60.5678	-0.616484	0.102589	-6.00928	1.86348e-09	1.27463e-08
AP000757.2	ENSG00000254844	lncRNA	0.403057	-1.1019	0.318822	-3.45616	0.000547934	0.00162028
AC107884.2	ENSG00000254864	lncRNA	1.23071	-0.382237	0.139613	-2.73783	0.00618463	0.0146711
LINC02688	ENSG00000254872	lncRNA	51.4731	-0.640157	0.119626	-5.35131	8.73205e-08	4.76814e-07
PTPRJ-AS1	ENSG00000254879	lncRNA	0.460812	-0.730066	0.215654	-3.38536	0.000710845	0.00205902
SCARNA9	ENSG00000254911	lncRNA	21.3529	-0.733398	0.110599	-6.63113	3.33135e-11	2.86769e-10
AL591684.2	ENSG00000254929	lncRNA	2.50961	0.527636	0.108208	4.87613	1.08185e-06	5.03876e-06
AP002498.1	ENSG00000254988	lncRNA	28.3355	-0.67316	0.189205	-3.55783	0.000373924	0.00114157
AC124276.1	ENSG00000254991	lncRNA	0.938028	-0.474449	0.164688	-2.88089	0.0039655	0.00984843
LINC02489	ENSG00000255007	lncRNA	8.41137	-0.474598	0.157702	-3.00946	0.00261713	0.00676336
AC136475.3	ENSG00000255026	lncRNA	213.68	-0.490349	0.144141	-3.40186	0.000669278	0.00194955
AP006621.1	ENSG00000255108	lncRNA	13.1712	-1.30872	0.132794	-9.85523	6.50657e-23	2.37574e-21
AP002360.1	ENSG00000255135	lncRNA	139.913	-0.419202	0.0625762	-6.69907	2.09756e-11	1.85148e-10
STX17-AS1	ENSG00000255145	lncRNA	18.2347	-0.23051	0.0794115	-2.90272	0.00369931	0.00924684
TOLLIP-AS1	ENSG00000255153	lncRNA	35.5572	-0.428573	0.0659399	-6.49945	8.06165e-11	6.59087e-10
AC131934.1	ENSG00000255158	lncRNA	2.69987	-0.314925	0.124981	-2.51978	0.0117429	0.0259746
AC134775.1	ENSG00000255165	lncRNA	0.739759	0.519757	0.167324	3.10629	0.00189452	0.00504426
AC084125.2	ENSG00000255182	lncRNA	71.3097	-0.432102	0.0851952	-5.0719	3.93863e-07	1.95444e-06
AC090559.1	ENSG00000255197	lncRNA	18.2719	0.767752	0.104496	7.34718	2.02439e-13	2.29509e-12
SNHG9	ENSG00000255198	lncRNA	92.1716	-0.888943	0.0860965	-10.325	5.43432e-25	2.55848e-23
AC087623.1	ENSG00000255201	lncRNA	2.45549	0.502116	0.139351	3.60323	0.000314284	0.000971755
AC109322.1	ENSG00000255224	lncRNA	56.0514	-0.460718	0.0637864	-7.22283	5.0917e-13	5.46464e-12
AP002992.1	ENSG00000255236	lncRNA	1.00302	-0.454821	0.183176	-2.48297	0.0130291	0.0285192
AC138230.1	ENSG00000255237	lncRNA	7.72264	-0.468757	0.0793273	-5.90915	3.4388e-09	2.27367e-08
MIR100HG	ENSG00000255248	lncRNA	132.657	0.653382	0.108206	6.03829	1.55756e-09	1.07577e-08
AP006621.3	ENSG00000255284	lncRNA	78.863	-0.39001	0.0664749	-5.86703	4.43677e-09	2.88458e-08
AC004923.4	ENSG00000255306	lncRNA	11.4965	-0.182658	0.0747075	-2.44498	0.0144861	0.0313336
AC120036.4	ENSG00000255366	lncRNA	2.60061	0.653515	0.141402	4.62168	3.80636e-06	1.63488e-05
TBX5-AS1	ENSG00000255399	lncRNA	0.52452	0.678713	0.290882	2.33329	0.0196328	0.0409014
AL354813.1	ENSG00000255438	lncRNA	4.45912	-0.327115	0.120614	-2.71208	0.00668633	0.0157253
AP002812.5	ENSG00000255449	lncRNA	3.61447	-0.617624	0.113143	-5.45881	4.79348e-08	2.71281e-07
AP002433.1	ENSG00000255467	lncRNA	1.80284	-0.795836	0.248153	-3.20703	0.00134112	0.00368528
GAU1	ENSG00000255474	lncRNA	405.614	-0.477457	0.1119	-4.26682	1.9828e-05	7.59753e-05
AP002748.4	ENSG00000255517	lncRNA	89.0853	-0.232017	0.0598042	-3.87961	0.000104623	0.000353513
AC090589.2	ENSG00000255520	lncRNA	0.612895	-0.487319	0.164682	-2.95915	0.0030849	0.00785956
LINC02700	ENSG00000255666	lncRNA	1.37017	0.719213	0.315716	2.27804	0.0227243	0.0464957
SNHG1	ENSG00000255717	lncRNA	1768.36	-0.175121	0.0546802	-3.20264	0.00136176	0.00373635
IFNG-AS1	ENSG00000255733	lncRNA	3.60029	0.732242	0.170886	4.28497	1.82763e-05	7.0446e-05
AGAP2-AS1	ENSG00000255737	lncRNA	253.505	-0.481956	0.0705861	-6.82791	8.61587e-12	8.00428e-11
LINC02422	ENSG00000255760	lncRNA	1.18242	0.843664	0.212542	3.9694	7.20539e-05	0.000250687
RMST	ENSG00000255794	lncRNA	0.485668	0.64896	0.280153	2.31645	0.0205336	0.042551
PXN-AS1	ENSG00000255857	lncRNA	101.282	-0.455703	0.0493729	-9.22981	2.71114e-20	7.23771e-19
DENND5B-AS1	ENSG00000255867	lncRNA	3.68143	0.940148	0.163902	5.73602	9.69259e-09	6.03089e-08
AC024901.1	ENSG00000255910	lncRNA	0.398371	0.651671	0.273488	2.38281	0.0171809	0.0364166
AP002993.1	ENSG00000255928	lncRNA	0.500326	-0.749539	0.243511	-3.07805	0.00208359	0.00549865
ARAP1-AS1	ENSG00000256007	lncRNA	0.612027	-0.716875	0.225653	-3.17689	0.00148862	0.00405013
URB1-AS1	ENSG00000256073	lncRNA	112.128	-0.305501	0.0555568	-5.49889	3.82188e-08	2.19346e-07
SBNO1-AS1	ENSG00000256092	lncRNA	42.5798	-0.401277	0.0710184	-5.65032	1.60151e-08	9.69347e-08
AC073912.1	ENSG00000256250	lncRNA	1.75554	0.634949	0.161904	3.92175	8.7907e-05	0.000301264
USP30-AS1	ENSG00000256262	lncRNA	42.5639	-0.289451	0.097832	-2.95866	0.00308984	0.00786951
CACNA1C-AS2	ENSG00000256271	lncRNA	5.72162	-0.496003	0.13049	-3.80107	0.000144072	0.000474846
AC073912.2	ENSG00000256299	lncRNA	1.02248	0.529417	0.182396	2.90257	0.00370118	0.0092509
AC138466.1	ENSG00000256312	lncRNA	1.77226	-0.656491	0.180672	-3.6336	0.000279494	0.000872513
AC010175.1	ENSG00000256427	lncRNA	0.478451	0.602622	0.200616	3.00386	0.00266575	0.00687876
AP003170.3	ENSG00000256452	lncRNA	0.958165	0.572389	0.142888	4.00585	6.17948e-05	0.000217648
AC148477.2	ENSG00000256542	lncRNA	4.49468	-0.639272	0.160531	-3.98224	6.827e-05	0.000238586
AC156455.1	ENSG00000256546	lncRNA	75.4527	-0.419691	0.109259	-3.84125	0.000122408	0.00040862
LINC02361	ENSG00000256576	lncRNA	29.7102	-0.308105	0.092589	-3.32766	0.000875788	0.00249482
LINC02393	ENSG00000256597	lncRNA	0.720101	1.16821	0.3723	3.13782	0.0017021	0.00457527
AP001160.1	ENSG00000256690	lncRNA	18.5272	-0.393301	0.073545	-5.34777	8.90461e-08	4.8582e-07
AC022613.1	ENSG00000256802	lncRNA	69.9792	-0.47305	0.154008	-3.07159	0.00212919	0.00560661
AP000721.2	ENSG00000256824	lncRNA	1.86946	-0.618821	0.17204	-3.59696	0.000321958	0.000993152
PPP1R14B-AS1	ENSG00000256940	lncRNA	65.0092	-0.741016	0.0790689	-9.37178	7.13212e-21	2.03625e-19
AC148477.3	ENSG00000256943	lncRNA	5.07887	-0.437876	0.157091	-2.78741	0.00531312	0.0128173
AC084375.1	ENSG00000256969	lncRNA	4.3391	-0.839882	0.231345	-3.63043	0.000282954	0.000882253
AC053513.2	ENSG00000256973	lncRNA	4.14022	0.589051	0.109319	5.38838	7.10968e-08	3.9311e-07
AC135782.1	ENSG00000256982	lncRNA	5.42333	-0.332795	0.135665	-2.45306	0.0141647	0.0307095
AC087241.2	ENSG00000257023	lncRNA	1.17947	-0.393909	0.140875	-2.79616	0.00517145	0.012515
MIR200CHG	ENSG00000257084	lncRNA	108.971	-0.795809	0.0727605	-10.9374	7.6376e-28	5.0168e-26
AP001453.3	ENSG00000257086	lncRNA	44.181	-0.239907	0.0586772	-4.08859	4.34003e-05	0.000157102
ODC1-DT	ENSG00000257135	lncRNA	35.3974	-0.268128	0.0603029	-4.44637	8.73355e-06	3.5511e-05
AC131157.1	ENSG00000257253	lncRNA	0.341195	-0.657346	0.259601	-2.53214	0.0113368	0.0251637
AC008147.1	ENSG00000257256	lncRNA	1.66727	-0.373311	0.138403	-2.69727	0.00699097	0.0163841
AC008014.1	ENSG00000257261	lncRNA	38.6117	-0.401992	0.063628	-6.31785	2.65234e-10	2.02509e-09
AL139020.1	ENSG00000257275	lncRNA	0.948869	1.16665	0.299362	3.89713	9.73391e-05	0.000330419
AC073896.2	ENSG00000257303	lncRNA	22.9279	-0.168298	0.0497513	-3.38279	0.000717545	0.00207654
AC068888.1	ENSG00000257337	lncRNA	167.453	-0.147087	0.0519596	-2.83079	0.00464337	0.01136
AC009803.1	ENSG00000257407	lncRNA	0.462924	-0.916165	0.248474	-3.68716	0.000226768	0.000720147
AC004241.1	ENSG00000257433	lncRNA	20.3893	-0.305552	0.0634157	-4.81823	1.44834e-06	6.61989e-06
AC011611.3	ENSG00000257453	lncRNA	4.53588	-0.544099	0.131192	-4.14734	3.36353e-05	0.000124416
PPFIA2-AS1	ENSG00000257467	lncRNA	0.332164	0.522869	0.225596	2.31772	0.0204646	0.0424263
LINC02373	ENSG00000257507	lncRNA	0.732167	-0.492777	0.151564	-3.25128	0.00114885	0.00320088
AC023509.2	ENSG00000257550	lncRNA	0.704111	0.565077	0.153243	3.68746	0.000226501	0.000719655
HLX-AS1	ENSG00000257551	lncRNA	0.44629	0.583644	0.203518	2.86778	0.00413367	0.0102249
LINC02298	ENSG00000257556	lncRNA	148.814	-0.541288	0.0729852	-7.41641	1.20341e-13	1.40602e-12
LINC01475	ENSG00000257582	lncRNA	3.59549	0.563491	0.128291	4.39229	1.12164e-05	4.47545e-05
LINC02356	ENSG00000257595	lncRNA	1.63822	-0.627941	0.157096	-3.99718	6.41013e-05	0.000225129
MYG1-AS1	ENSG00000257605	lncRNA	23.4447	-0.323874	0.0554173	-5.84428	5.08775e-09	3.2838e-08
AC124312.2	ENSG00000257647	lncRNA	1.42973	0.740445	0.186098	3.97878	6.92684e-05	0.000241744
ADCY6-DT	ENSG00000257660	lncRNA	27.8376	-0.285159	0.0899978	-3.16851	0.00153221	0.0041566
AC007298.1	ENSG00000257715	lncRNA	0.827035	-0.836386	0.21882	-3.82226	0.000132235	0.000438706
AC009387.1	ENSG00000257781	lncRNA	0.487238	-1.06783	0.312918	-3.41248	0.000643744	0.0018809
AC073573.1	ENSG00000257808	lncRNA	0.859241	-0.660987	0.166696	-3.96522	7.33274e-05	0.000254816
PRANCR	ENSG00000257815	lncRNA	36.5292	-0.197676	0.0537305	-3.67903	0.000234126	0.000741049
AC026765.3	ENSG00000257817	lncRNA	1.27857	-0.605296	0.169199	-3.57743	0.000346988	0.00106546
AC016705.1	ENSG00000258010	lncRNA	0.800855	-0.670509	0.259852	-2.58035	0.00987011	0.022265
AC011603.3	ENSG00000258017	lncRNA	12.8152	-0.716659	0.122679	-5.84175	5.16545e-09	3.33058e-08
AC005841.1	ENSG00000258092	lncRNA	3.03368	-0.590623	0.120807	-4.88898	1.01358e-06	4.73812e-06
ATXN2-AS	ENSG00000258099	lncRNA	8.62883	-0.456105	0.0712721	-6.39949	1.559e-10	1.22758e-09
AC079313.2	ENSG00000258137	lncRNA	1.35458	0.567602	0.211584	2.68263	0.00730457	0.0170407
AC073896.4	ENSG00000258199	lncRNA	82.7446	-0.412927	0.0545961	-7.5633	3.92961e-14	4.89014e-13
AC125611.3	ENSG00000258232	lncRNA	0.684297	-1.03843	0.223442	-4.64741	3.36125e-06	1.45738e-05
AC012085.2	ENSG00000258274	lncRNA	3.59023	0.538341	0.205853	2.61517	0.00891827	0.0203508
TESC-AS1	ENSG00000258285	lncRNA	1.67145	-0.657715	0.204328	-3.21892	0.00128675	0.0035512
RCCD1-AS1	ENSG00000258384	lncRNA	11.7196	-0.496101	0.0720931	-6.88139	5.927e-12	5.61544e-11
AL117190.1	ENSG00000258399	lncRNA	1.64225	0.51403	0.136646	3.76177	0.000168712	0.000549378
AL158801.2	ENSG00000258413	lncRNA	2.82819	-0.569251	0.109304	-5.20798	1.90909e-07	9.8879e-07
EGILA	ENSG00000258451	lncRNA	5.5887	-0.253966	0.0963206	-2.63667	0.00837243	0.0192488
LINC02207	ENSG00000258476	lncRNA	2.55261	0.519492	0.141347	3.6753	0.000237575	0.000751095
AL049835.1	ENSG00000258490	lncRNA	0.314969	-0.710668	0.303738	-2.33974	0.019297	0.0402986
AL359682.1	ENSG00000258497	lncRNA	0.411629	0.70884	0.25153	2.81811	0.00483074	0.0117822
DIO3OS	ENSG00000258498	lncRNA	624.388	-0.656186	0.122909	-5.3388	9.35654e-08	5.08734e-07
LINC00239	ENSG00000258512	lncRNA	63.9691	-0.592283	0.0953701	-6.21036	5.28623e-10	3.87883e-09
AL132712.1	ENSG00000258534	lncRNA	25.2686	-0.207221	0.0716665	-2.89146	0.00383458	0.00954812
LINC02322	ENSG00000258556	lncRNA	0.286093	-0.581843	0.251681	-2.31183	0.0207869	0.0430036
AL359232.1	ENSG00000258561	lncRNA	16.3551	-0.405634	0.0768039	-5.28142	1.28183e-07	6.82495e-07
AC007376.2	ENSG00000258569	lncRNA	1.05087	0.593343	0.145322	4.08295	4.44679e-05	0.000160723
AL583810.1	ENSG00000258593	lncRNA	11.8716	-0.340387	0.100628	-3.38261	0.000718002	0.00207754
LINC01629	ENSG00000258602	lncRNA	0.597835	0.567215	0.251487	2.25545	0.0241052	0.0489596
AL121821.2	ENSG00000258636	lncRNA	0.636653	0.695682	0.198457	3.50546	0.000455822	0.00137015
LINC01269	ENSG00000258689	lncRNA	6.79671	-0.336291	0.145642	-2.30902	0.0209425	0.0432879
LINC00871	ENSG00000258700	lncRNA	1.75757	-0.841493	0.287089	-2.93112	0.00337743	0.00853037
ITPK1-AS1	ENSG00000258730	lncRNA	2.85066	-0.803248	0.169599	-4.73615	2.17814e-06	9.70265e-06
AL583722.2	ENSG00000258736	lncRNA	0.765606	-0.437822	0.190285	-2.30087	0.0213988	0.0441331
LINC01579	ENSG00000258754	lncRNA	17.6495	0.595839	0.123564	4.82211	1.42048e-06	6.50028e-06
LINC00520	ENSG00000258791	lncRNA	16.0625	-0.703793	0.165797	-4.2449	2.18691e-05	8.32373e-05
AL137230.1	ENSG00000258792	lncRNA	3.13671	-0.923038	0.15164	-6.08705	1.15009e-09	8.06136e-09
AL133153.2	ENSG00000258798	lncRNA	2.85395	-0.333801	0.104663	-3.18928	0.00142627	0.00389657
AL133371.2	ENSG00000258810	lncRNA	3.81071	0.703654	0.104379	6.74136	1.56915e-11	1.40748e-10
AC103996.2	ENSG00000258831	lncRNA	0.482257	0.63665	0.228423	2.78716	0.00531721	0.0128255
AL391261.2	ENSG00000258847	lncRNA	1.17634	-0.403493	0.174329	-2.31455	0.0206378	0.0427436
AC005480.1	ENSG00000258891	lncRNA	2.8731	-0.300529	0.118398	-2.5383	0.0111393	0.0247693
LINC02691	ENSG00000258913	lncRNA	7.77386	-0.438283	0.187171	-2.34162	0.0192002	0.040127
AL049836.1	ENSG00000258919	lncRNA	42.0829	-0.508666	0.10221	-4.97669	6.46816e-07	3.10955e-06
FOXN3-AS1	ENSG00000258920	lncRNA	45.9051	-0.328915	0.0652863	-5.03805	4.70309e-07	2.30713e-06
AL355916.2	ENSG00000258926	lncRNA	1.24971	0.545019	0.149947	3.63475	0.000278247	0.000868901
AL132639.2	ENSG00000258940	lncRNA	15.4645	-0.302958	0.0762543	-3.97299	7.09767e-05	0.000247277
AC004846.2	ENSG00000258944	lncRNA	5.15481	-0.342078	0.0857003	-3.99156	6.56408e-05	0.000229944
AC013451.2	ENSG00000258976	lncRNA	0.352944	0.602302	0.257813	2.33619	0.0194811	0.0406209
AL132642.1	ENSG00000258987	lncRNA	1.56166	1.10611	0.170849	6.4742	9.53184e-11	7.71855e-10
AL355075.4	ENSG00000259001	lncRNA	1.11714	-0.809921	0.202564	-3.99835	6.37858e-05	0.000224145
AL121820.2	ENSG00000259038	lncRNA	5.52925	-0.403661	0.107859	-3.74249	0.000182209	0.000589412
LINC02332	ENSG00000259054	lncRNA	1.85429	-0.347229	0.153015	-2.26925	0.0232532	0.0474383
AC005520.2	ENSG00000259065	lncRNA	33.3146	-0.459077	0.0872867	-5.25942	1.44512e-07	7.62429e-07
AL137191.1	ENSG00000259093	lncRNA	1.15489	-0.662376	0.188031	-3.52271	0.000427166	0.0012898
AC013457.1	ENSG00000259094	lncRNA	1.01602	0.925715	0.337319	2.74433	0.00606351	0.0144164
AL049869.3	ENSG00000259116	lncRNA	4.80163	0.598613	0.100479	5.9576	2.55964e-09	1.72154e-08
LRP1-AS	ENSG00000259125	lncRNA	3.80197	-0.400198	0.0971029	-4.12138	3.76617e-05	0.000137843
LINC00648	ENSG00000259129	lncRNA	1.70904	2.05528	0.413823	4.96656	6.81514e-07	3.27019e-06
LINC00924	ENSG00000259134	lncRNA	8.0702	0.770702	0.150044	5.13649	2.79916e-07	1.42035e-06
LINC02323	ENSG00000259230	lncRNA	43.3286	-0.545052	0.102293	-5.32834	9.91148e-08	5.36818e-07
AC092755.2	ENSG00000259238	lncRNA	2.61065	-0.399755	0.107919	-3.7042	0.000212059	0.000677317
AC002306.1	ENSG00000259242	lncRNA	1.60255	-0.926736	0.151374	-6.12216	9.23144e-10	6.54505e-09
AC005096.1	ENSG00000259294	lncRNA	1.79296	-0.424816	0.144204	-2.94594	0.00321971	0.00816934
AC116158.1	ENSG00000259326	lncRNA	2.1018	0.500847	0.123404	4.05858	4.93714e-05	0.00017699
AC025580.1	ENSG00000259342	lncRNA	153.741	-0.281155	0.119699	-2.34885	0.0188317	0.0394561
TMC3-AS1	ENSG00000259343	lncRNA	25.0128	-0.232661	0.0728251	-3.19479	0.00139934	0.00382765
AC087482.1	ENSG00000259347	lncRNA	4.46432	-0.599812	0.16218	-3.69844	0.000216932	0.00069138
AC090515.4	ENSG00000259353	lncRNA	1.29865	1.1436	0.190819	5.99314	2.05833e-09	1.40089e-08
AC090825.1	ENSG00000259363	lncRNA	3.43149	0.660402	0.118782	5.55979	2.701e-08	1.58637e-07
AC087286.2	ENSG00000259367	lncRNA	2.1096	1.26687	0.164879	7.68363	1.54642e-14	2.02528e-13
AC090970.1	ENSG00000259398	lncRNA	0.995177	-0.9628	0.200119	-4.81114	1.50073e-06	6.84215e-06
AC009292.2	ENSG00000259410	lncRNA	0.502868	-0.479498	0.193902	-2.47289	0.0134025	0.0292529
AL161669.1	ENSG00000259444	lncRNA	5.53523	-0.362962	0.116798	-3.1076	0.00188612	0.00502484
AC084757.2	ENSG00000259469	lncRNA	0.868945	-0.498875	0.161012	-3.09836	0.00194592	0.00516924
TPM1-AS	ENSG00000259498	lncRNA	48.1541	-0.293637	0.0992808	-2.95764	0.0031	0.00789225
AC027243.1	ENSG00000259514	lncRNA	1.28848	-0.627847	0.209044	-3.00342	0.00266961	0.00688686
AL117209.1	ENSG00000259515	lncRNA	12.0214	-0.294385	0.0835318	-3.52422	0.00042473	0.00128357
AC068397.1	ENSG00000259528	lncRNA	0.365251	-0.67975	0.259754	-2.6169	0.00887335	0.0202567
AC074212.1	ENSG00000259605	lncRNA	39.7239	-0.556703	0.0781385	-7.12456	1.04412e-12	1.07939e-11
AC104316.2	ENSG00000259631	lncRNA	0.456179	-0.436128	0.191556	-2.27676	0.0228004	0.0466389
AC111152.2	ENSG00000259647	lncRNA	1.74627	-0.307884	0.115153	-2.67369	0.00750211	0.0174621
AC115102.1	ENSG00000259654	lncRNA	0.972581	-0.40483	0.13159	-3.07646	0.00209473	0.00552615
AC103982.1	ENSG00000259676	lncRNA	0.7026	0.578014	0.162609	3.55463	0.000378511	0.0011541
AC066613.2	ENSG00000259678	lncRNA	0.3299	0.586834	0.209764	2.79759	0.00514848	0.0124689
AC124248.1	ENSG00000259704	lncRNA	25.8577	-0.407723	0.0907901	-4.49083	7.09455e-06	2.92639e-05
AC090877.2	ENSG00000259721	lncRNA	6.64728	-0.480378	0.147688	-3.25266	0.00114331	0.00318778
LINC01581	ENSG00000259724	lncRNA	1.08146	0.62902	0.199952	3.14585	0.00165603	0.00446211
AC092868.2	ENSG00000259735	lncRNA	0.939113	-0.551774	0.189565	-2.91074	0.00360577	0.00903664
AC012236.1	ENSG00000259772	lncRNA	44.486	-0.247044	0.0921241	-2.68164	0.00732612	0.0170847
AC009065.1	ENSG00000259780	lncRNA	1.74864	-0.338113	0.144005	-2.34793	0.0188783	0.0395451
AC104758.1	ENSG00000259792	lncRNA	3.62014	-0.237165	0.102123	-2.32234	0.0202145	0.0419738
AC138028.3	ENSG00000259813	lncRNA	0.39387	-0.649671	0.244852	-2.65332	0.00797046	0.0184244
AL365361.1	ENSG00000259834	lncRNA	30.9414	1.02793	0.121657	8.44945	2.9269e-17	5.34093e-16
Z97653.1	ENSG00000259840	lncRNA	2.28564	-0.817415	0.153516	-5.32463	1.01161e-07	5.47153e-07
AC130456.1	ENSG00000259871	lncRNA	1.87502	0.501206	0.177164	2.82906	0.00466854	0.011415
AC022819.1	ENSG00000259921	lncRNA	4.38905	-0.241543	0.0956641	-2.5249	0.011573	0.0256344
AC051619.6	ENSG00000259932	lncRNA	1.59018	-0.295259	0.10639	-2.77524	0.00551604	0.0132549
AC009065.2	ENSG00000259933	lncRNA	396.606	-0.445833	0.0630263	-7.07376	1.50794e-12	1.52627e-11
AC009133.2	ENSG00000259952	lncRNA	1.4406	-1.34119	0.342212	-3.91919	8.88489e-05	0.000304246
AC027601.1	ENSG00000260005	lncRNA	53.5315	-0.53601	0.0817744	-6.55474	5.57395e-11	4.66784e-10
AC040169.1	ENSG00000260018	lncRNA	29.5089	-0.651117	0.089716	-7.25753	3.94215e-13	4.29357e-12
CRIM1-DT	ENSG00000260025	lncRNA	18.0837	-0.173426	0.0624549	-2.77682	0.00548929	0.0131981
AC009090.1	ENSG00000260038	lncRNA	3.44351	-0.229147	0.0923434	-2.48147	0.0130841	0.02862
AC009088.1	ENSG00000260060	lncRNA	4.09993	-0.272709	0.0940628	-2.89922	0.00374093	0.00933864
MIR762HG	ENSG00000260083	lncRNA	40.3819	-0.167043	0.050923	-3.28031	0.00103693	0.00291369
DDX59-AS1	ENSG00000260088	lncRNA	3.96407	-0.61615	0.138866	-4.43701	9.12176e-06	3.69676e-05
AC012174.1	ENSG00000260115	lncRNA	0.573218	-1.03586	0.298493	-3.47031	0.000519851	0.00154585
AC008915.3	ENSG00000260136	lncRNA	44.2751	-0.207909	0.052129	-3.98835	6.65351e-05	0.000232842
AL162741.1	ENSG00000260179	lncRNA	5.29171	-0.304753	0.0881102	-3.45877	0.000542649	0.00160714
AC120498.2	ENSG00000260182	lncRNA	1.01785	0.505304	0.211063	2.3941	0.0166614	0.0354347
AL807752.5	ENSG00000260190	lncRNA	3.73041	-0.249487	0.0949622	-2.62723	0.00860834	0.0197248
LINC02846	ENSG00000260193	lncRNA	20.6034	-0.52169	0.0949941	-5.49182	3.97821e-08	2.27669e-07
AC124798.1	ENSG00000260196	lncRNA	452.658	-0.192917	0.0673024	-2.86642	0.00415142	0.0102635
AC092718.2	ENSG00000260213	lncRNA	7.15403	-0.164868	0.0677944	-2.43189	0.0150204	0.0323409
KDM7A-DT	ENSG00000260231	lncRNA	799.783	-0.159052	0.0601041	-2.64628	0.00813818	0.0187701
ZNRD2-AS1	ENSG00000260233	lncRNA	56.8517	-0.162331	0.0515918	-3.14645	0.00165264	0.00445465
AC099778.1	ENSG00000260236	lncRNA	27.9161	-0.153404	0.0618237	-2.48131	0.0130901	0.0286315
LINC02533	ENSG00000260239	lncRNA	1.38576	-0.925002	0.223406	-4.14046	3.46613e-05	0.000127853
AC104083.1	ENSG00000260244	lncRNA	189.005	0.955735	0.0951018	10.0496	9.22447e-24	3.82061e-22
AL035071.1	ENSG00000260257	lncRNA	245.143	-0.229289	0.0699454	-3.27811	0.00104504	0.00293453
SNHG19	ENSG00000260260	lncRNA	397.656	-0.827966	0.0755915	-10.9532	6.4173e-28	4.24441e-26
AC009088.2	ENSG00000260304	lncRNA	2.43303	-1.18732	0.203251	-5.84165	5.16878e-09	3.33217e-08
AC027277.2	ENSG00000260310	lncRNA	1.95108	-0.668922	0.165147	-4.05045	5.11182e-05	0.00018284
AL008727.1	ENSG00000260316	lncRNA	4.41958	-0.793617	0.11002	-7.21336	5.45871e-13	5.8356e-12
AC104024.2	ENSG00000260328	lncRNA	10.3427	-0.359673	0.125429	-2.86753	0.00413684	0.0102321
AC007218.1	ENSG00000260362	lncRNA	1.36972	-0.558819	0.186788	-2.99173	0.00277404	0.00712549
LINC02867	ENSG00000260394	lncRNA	1.94036	-0.309485	0.135542	-2.28332	0.0224117	0.0459569
AP002761.4	ENSG00000260401	lncRNA	160.018	-0.177179	0.0786178	-2.25367	0.024217	0.0491541
AC012414.4	ENSG00000260409	lncRNA	0.412157	0.76223	0.215398	3.53871	0.000402095	0.00122065
AL353746.1	ENSG00000260412	lncRNA	0.787621	0.741591	0.205983	3.60026	0.000317903	0.000981513
AL023284.4	ENSG00000260418	lncRNA	93.366	-0.595631	0.0672218	-8.86069	7.95238e-19	1.76238e-17
LINC02182	ENSG00000260420	lncRNA	1.92165	-0.546375	0.202422	-2.69919	0.00695089	0.0162967
ATP2A1-AS1	ENSG00000260442	lncRNA	27.9504	-0.210135	0.0901141	-2.33188	0.0197072	0.0410363
AC018552.2	ENSG00000260467	lncRNA	0.827261	1.0211	0.199306	5.12328	3.00264e-07	1.51675e-06
LINC01290	ENSG00000260468	lncRNA	3.57667	-0.22119	0.0955691	-2.31445	0.020643	0.0427488
AL353719.1	ENSG00000260475	lncRNA	2.62323	-0.260597	0.111706	-2.33288	0.0196544	0.0409399
AC009041.1	ENSG00000260496	lncRNA	1.93477	-0.567378	0.177267	-3.20069	0.00137098	0.00375897
AC126696.3	ENSG00000260498	lncRNA	3.28029	-0.476145	0.133256	-3.57314	0.000352721	0.00108176
AL590787.1	ENSG00000260509	lncRNA	0.739559	0.58212	0.162903	3.57341	0.000352359	0.00108074
AC023043.1	ENSG00000260552	lncRNA	29.2192	-0.222784	0.0791976	-2.81301	0.00490798	0.0119531
AC092681.2	ENSG00000260555	lncRNA	3.3244	-0.245979	0.0960374	-2.56128	0.0104288	0.0233684
AC018557.2	ENSG00000260558	lncRNA	0.950808	-0.681629	0.175723	-3.879	0.000104886	0.000354307
AC110597.1	ENSG00000260578	lncRNA	1.78317	0.607241	0.138923	4.37106	1.23642e-05	4.89967e-05
AP000223.1	ENSG00000260583	lncRNA	2.67294	-0.356748	0.105883	-3.36928	0.000753647	0.00217312
AC130456.3	ENSG00000260592	lncRNA	16.5994	-0.369929	0.0817346	-4.52597	6.01177e-06	2.50626e-05
AC009097.2	ENSG00000260593	lncRNA	6.78498	-0.49225	0.0970822	-5.07045	3.9688e-07	1.96813e-06
AC025917.1	ENSG00000260618	lncRNA	5.87795	0.678832	0.0976396	6.95242	3.5907e-12	3.49641e-11
AC092140.1	ENSG00000260621	lncRNA	0.339468	-0.522982	0.219712	-2.38031	0.0172982	0.0366449
SNAI3-AS1	ENSG00000260630	lncRNA	50.7478	-0.226525	0.0668855	-3.38676	0.000707237	0.00204919
AF213884.3	ENSG00000260651	lncRNA	1.78472	-0.828479	0.140266	-5.90648	3.49502e-09	2.30922e-08
AC237221.1	ENSG00000260653	lncRNA	5.6381	0.870085	0.271357	3.20642	0.00134398	0.00369261
AC116903.2	ENSG00000260661	lncRNA	1.04524	0.639025	0.170322	3.75187	0.000175519	0.00056994
LINC00543	ENSG00000260704	lncRNA	177.332	-0.343672	0.0789053	-4.3555	1.32762e-05	5.23286e-05
AL118516.1	ENSG00000260708	lncRNA	99.0196	-0.407264	0.0631139	-6.45284	1.09772e-10	8.82912e-10
AC120498.4	ENSG00000260710	lncRNA	5.27847	-0.539304	0.169842	-3.17533	0.00149666	0.00407026
AC009133.3	ENSG00000260719	lncRNA	3.02561	0.594592	0.150966	3.93858	8.19637e-05	0.000282414
AC026471.3	ENSG00000260740	lncRNA	24.326	-0.731229	0.102247	-7.15156	8.5797e-13	8.9814e-12
AC106799.3	ENSG00000260763	lncRNA	0.975112	1.28317	0.45626	2.81235	0.00491803	0.0119722
AC009065.4	ENSG00000260778	lncRNA	30.7265	-0.599843	0.0728551	-8.23336	1.82027e-16	3.02421e-15
LINC02280	ENSG00000260792	lncRNA	3.86019	-0.265006	0.108383	-2.44509	0.0144815	0.0313253
AC003102.1	ENSG00000260793	lncRNA	58.3713	-0.193605	0.070177	-2.75881	0.0058013	0.0138542
AC099314.1	ENSG00000260798	lncRNA	1.00274	-0.417781	0.148088	-2.82116	0.00478503	0.0116819
AL163051.1	ENSG00000260806	lncRNA	42.2405	-0.427054	0.0689153	-6.1968	5.76237e-10	4.204e-09
CEROX1	ENSG00000260807	lncRNA	141.474	-0.797184	0.151267	-5.27005	1.36389e-07	7.22321e-07
AC027279.1	ENSG00000260816	lncRNA	6.60426	-0.492025	0.133596	-3.68293	0.000230569	0.000730942
AP005233.2	ENSG00000260877	lncRNA	31.3483	-0.599459	0.134807	-4.44678	8.71666e-06	3.54537e-05
TAT-AS1	ENSG00000260886	lncRNA	1.24441	-0.368146	0.157249	-2.34116	0.0192238	0.0401655
AC106886.2	ENSG00000260899	lncRNA	11.8423	-0.283155	0.0835566	-3.38878	0.00070205	0.00203663
AC107398.3	ENSG00000260918	lncRNA	8.3598	0.675944	0.16253	4.15888	3.19806e-05	0.000118709
LINC01311	ENSG00000260924	lncRNA	40.8586	-0.603049	0.0741055	-8.13772	4.02807e-16	6.41086e-15
LINC02555	ENSG00000260943	lncRNA	1.04329	0.790107	0.236651	3.3387	0.000841726	0.00240676
AL356489.2	ENSG00000260947	lncRNA	4.17564	1.03187	0.16957	6.08522	1.16333e-09	8.14968e-09
AP006545.1	ENSG00000260949	lncRNA	6.72469	-0.230363	0.0909179	-2.53375	0.0112849	0.0250601
AC026462.3	ENSG00000260963	lncRNA	21.9673	-0.252799	0.0985727	-2.5646	0.0103296	0.0231824
AC126407.1	ENSG00000260978	lncRNA	0.831912	1.27554	0.367876	3.46731	0.000525688	0.00156102
AL133297.2	ENSG00000260989	lncRNA	9.24211	-0.805941	0.174804	-4.61054	4.01616e-06	1.71815e-05
DOCK9-DT	ENSG00000260992	lncRNA	27.284	-0.224832	0.0777341	-2.89231	0.00382415	0.009524
BX255925.1	ENSG00000260996	lncRNA	35.5944	-0.462421	0.0968714	-4.77355	1.81003e-06	8.16084e-06
AC244034.2	ENSG00000261000	lncRNA	2.70018	-0.317589	0.127311	-2.49458	0.0126105	0.0276872
LINC02544	ENSG00000261039	lncRNA	5.95069	0.76399	0.191684	3.98568	6.7286e-05	0.000235341
LINC02178	ENSG00000261092	lncRNA	2.99401	-0.795775	0.295436	-2.69356	0.00706927	0.0165484
AL133299.1	ENSG00000261120	lncRNA	3.57917	-0.67735	0.196085	-3.45437	0.000551575	0.00163004
LINC02473	ENSG00000261121	lncRNA	14.3824	-0.361991	0.140587	-2.57486	0.010028	0.0225744
AC009065.5	ENSG00000261123	lncRNA	318.966	-0.200571	0.0604035	-3.32052	0.000898484	0.00255377
SPINT1-AS1	ENSG00000261183	lncRNA	400.018	-0.58003	0.0506413	-11.4537	2.25345e-30	2.00342e-28
AC099524.1	ENSG00000261218	lncRNA	3.28209	0.525365	0.137953	3.8083	0.000139926	0.000462537
AC064805.1	ENSG00000261222	lncRNA	13.1454	-0.572597	0.16775	-3.4134	0.000641574	0.0018747
AC092142.1	ENSG00000261235	lncRNA	4.2672	-0.304169	0.129362	-2.35129	0.0187083	0.0392277
AC008870.3	ENSG00000261266	lncRNA	3.20602	-0.309089	0.102431	-3.01754	0.00254836	0.0066017
AC112236.1	ENSG00000261268	lncRNA	0.845667	-0.915666	0.265239	-3.45223	0.000555983	0.0016418
AC093278.2	ENSG00000261269	lncRNA	47.8046	0.628583	0.0640821	9.80903	1.02956e-22	3.69915e-21
AP003071.3	ENSG00000261276	lncRNA	0.633807	0.5799	0.197504	2.93614	0.0033232	0.00840563
ATP2C2-AS1	ENSG00000261286	lncRNA	47.4309	-0.394459	0.0823056	-4.79262	1.64619e-06	7.4626e-06
AC110491.1	ENSG00000261292	lncRNA	0.604823	0.852346	0.372259	2.28966	0.022041	0.0452746
AC002550.1	ENSG00000261312	lncRNA	0.414355	-0.543056	0.222354	-2.44231	0.0145938	0.0315397
AC009061.1	ENSG00000261320	lncRNA	7.98286	-1.09268	0.135067	-8.08991	5.97073e-16	9.32033e-15
AC021016.1	ENSG00000261338	lncRNA	57.7447	-0.119929	0.0485961	-2.46787	0.0135921	0.0296296
AC099518.2	ENSG00000261357	lncRNA	14.2762	-0.270333	0.0900321	-3.00263	0.0026766	0.00690164
PYCARD-AS1	ENSG00000261359	lncRNA	4.29242	-0.617603	0.10401	-5.93791	2.88683e-09	1.92736e-08
AC010735.1	ENSG00000261379	lncRNA	0.885748	0.73829	0.201776	3.65896	0.000253237	0.000797185
AL591222.1	ENSG00000261402	lncRNA	1.89685	0.539046	0.20481	2.63193	0.00849009	0.0194772
AC013565.3	ENSG00000261407	lncRNA	0.657563	-0.461154	0.158568	-2.90824	0.00363467	0.00910131
AL023803.1	ENSG00000261431	lncRNA	3.08126	-0.678378	0.138718	-4.89035	1.00659e-06	4.70713e-06
AC124068.2	ENSG00000261441	lncRNA	10.2092	-0.299653	0.0923309	-3.24542	0.00117276	0.00326157
AC109446.3	ENSG00000261448	lncRNA	42.6042	-0.351559	0.136978	-2.56654	0.0102719	0.0230679
LINC01003	ENSG00000261455	lncRNA	232.163	-0.194082	0.0675178	-2.87453	0.00404633	0.010029
AC026471.4	ENSG00000261474	lncRNA	39.2605	-0.303085	0.0686238	-4.41661	1.00259e-05	4.03411e-05
LINC00566	ENSG00000261498	lncRNA	0.875033	0.632226	0.235091	2.68928	0.00716054	0.0167343
AL031714.1	ENSG00000261505	lncRNA	140.84	-0.238425	0.0712788	-3.34497	0.00082292	0.00235739
AC009097.4	ENSG00000261513	lncRNA	1.89265	-0.512214	0.150275	-3.4085	0.000653205	0.00190636
AC012615.1	ENSG00000261526	lncRNA	78.3079	-0.219606	0.0583908	-3.76097	0.000169253	0.00055081
AC005086.2	ENSG00000261535	lncRNA	0.733388	-0.465437	0.167073	-2.78582	0.00533917	0.0128728
AC135782.3	ENSG00000261546	lncRNA	4.9946	-0.265345	0.0871035	-3.04631	0.00231667	0.00605815
AL137782.1	ENSG00000261553	lncRNA	67.8445	-0.230525	0.0645943	-3.56882	0.000358597	0.0010982
AC233266.2	ENSG00000261600	lncRNA	2.99443	0.769184	0.205033	3.75151	0.00017577	0.000570707
AC036108.3	ENSG00000261616	lncRNA	11.2777	0.580966	0.109405	5.31021	1.09497e-07	5.88911e-07
AP003071.4	ENSG00000261625	lncRNA	13.9879	0.643762	0.119432	5.3902	7.03793e-08	3.8948e-07
AC026992.2	ENSG00000261634	lncRNA	2.86732	0.55745	0.164001	3.39906	0.000676175	0.00196769
AC009065.8	ENSG00000261663	lncRNA	29.7774	-0.143618	0.0625522	-2.29598	0.0216772	0.0446325
TTC39A-AS1	ENSG00000261664	lncRNA	19.7844	-0.323035	0.0878202	-3.67837	0.000234734	0.000742676
AC093591.2	ENSG00000261668	lncRNA	2.54313	-0.281531	0.115682	-2.43366	0.0149469	0.0322045
AL158211.1	ENSG00000261671	lncRNA	1.00804	0.51522	0.180736	2.85067	0.00436271	0.0107396
AC068724.2	ENSG00000261687	lncRNA	2.08858	-0.290396	0.118107	-2.45875	0.0139422	0.0302907
SSTR5-AS1	ENSG00000261713	lncRNA	76.4753	-1.14389	0.208257	-5.4927	3.95845e-08	2.26572e-07
AL133383.1	ENSG00000261729	lncRNA	4.10354	-0.319215	0.137371	-2.32375	0.0201391	0.0418378
AC116096.1	ENSG00000261734	lncRNA	0.253951	-0.655	0.255207	-2.56654	0.0102717	0.0230679
AC002551.1	ENSG00000261736	lncRNA	0.647577	-0.717896	0.215802	-3.32664	0.000878986	0.00250356
AC008555.1	ENSG00000261754	lncRNA	15.0041	0.515138	0.111828	4.60653	4.09436e-06	1.75043e-05
AC009054.2	ENSG00000261783	lncRNA	8.43551	-0.266892	0.0910318	-2.93186	0.00336943	0.00851354
AC006058.1	ENSG00000261786	lncRNA	5.31051	0.708985	0.159375	4.44853	8.64581e-06	3.51842e-05
AL033527.2	ENSG00000261798	lncRNA	15.0721	-0.590467	0.0906936	-6.51057	7.48679e-11	6.15643e-10
AC134312.6	ENSG00000261816	lncRNA	0.427234	-0.526712	0.223387	-2.35784	0.0183815	0.0386335
AC009407.1	ENSG00000261829	lncRNA	13.1874	-0.379277	0.110292	-3.43885	0.000584201	0.00171941
AC093249.6	ENSG00000261840	lncRNA	26.0441	-0.196371	0.0676133	-2.90432	0.00368055	0.00920353
MMP25-AS1	ENSG00000261971	lncRNA	184.172	-0.419463	0.082737	-5.06984	3.98153e-07	1.97393e-06
AC116025.1	ENSG00000261978	lncRNA	1.18897	-0.550006	0.177577	-3.09729	0.00195302	0.00518557
AC139530.1	ENSG00000262049	lncRNA	97.8476	-0.453881	0.0568355	-7.98587	1.39535e-15	2.07883e-14
AC005696.1	ENSG00000262050	lncRNA	15.1491	-0.201359	0.0760147	-2.64895	0.00807432	0.0186386
AC040977.1	ENSG00000262089	lncRNA	22.0119	-0.240125	0.0621213	-3.86542	0.000110896	0.000372864
LINC02185	ENSG00000262097	lncRNA	0.965973	0.636884	0.171153	3.72114	0.000198325	0.000637231
AC127496.2	ENSG00000262098	lncRNA	1.83089	-0.353011	0.142193	-2.48262	0.0130419	0.028536
BCAR4	ENSG00000262117	lncRNA	0.447905	-0.726772	0.211802	-3.43138	0.000600528	0.00176353
LINC02175	ENSG00000262155	lncRNA	6.45815	0.513355	0.0965238	5.31843	1.04664e-07	5.64665e-07
LINC01978	ENSG00000262188	lncRNA	112.536	-0.663117	0.117365	-5.65006	1.60396e-08	9.70369e-08
AL157931.1	ENSG00000262198	lncRNA	0.657186	0.748784	0.294168	2.54543	0.0109144	0.0243293
AC087392.3	ENSG00000262228	lncRNA	6.79508	-0.208277	0.0896542	-2.32311	0.020173	0.0419013
AC129507.2	ENSG00000262294	lncRNA	19.5216	-0.303977	0.0979029	-3.10488	0.00190354	0.00506617
AC118755.1	ENSG00000262296	lncRNA	0.546183	-1.40555	0.250737	-5.60569	2.07428e-08	1.23577e-07
AC004771.3	ENSG00000262429	lncRNA	0.529503	-1.14307	0.253677	-4.50599	6.60627e-06	2.73679e-05
LINC01569	ENSG00000262468	lncRNA	116.32	-0.228883	0.0646695	-3.53927	0.000401229	0.00121841
AL022341.2	ENSG00000262528	lncRNA	2.99004	-0.625028	0.13206	-4.73291	2.21325e-06	9.84643e-06
AC129507.3	ENSG00000262558	lncRNA	15.1111	-0.36216	0.085405	-4.24051	2.23015e-05	8.47479e-05
AC087741.1	ENSG00000262580	lncRNA	128.823	-0.324616	0.0778208	-4.17133	3.02822e-05	0.000112777
LINC01979	ENSG00000262585	lncRNA	76.774	-0.415421	0.100776	-4.12222	3.75239e-05	0.000137378
LINC00621	ENSG00000262619	lncRNA	0.539307	0.609335	0.236722	2.57406	0.0100514	0.0226191
GLIS2-AS1	ENSG00000262686	lncRNA	2.82675	-0.552063	0.147644	-3.73916	0.000184637	0.000596518
AC012676.1	ENSG00000262712	lncRNA	33.3878	-0.265367	0.0692539	-3.8318	0.00012721	0.000423578
AC100791.2	ENSG00000262768	lncRNA	7.32584	-0.546812	0.129492	-4.22275	2.41341e-05	9.12313e-05
LINC01977	ENSG00000262772	lncRNA	25.3627	-0.578548	0.106652	-5.42466	5.80646e-08	3.24858e-07
AC032044.1	ENSG00000262777	lncRNA	7.12859	-0.292663	0.0963552	-3.03734	0.00238677	0.00622231
U91319.1	ENSG00000262801	lncRNA	3.53836	0.782675	0.330544	2.36784	0.0178922	0.0377539
AC127521.1	ENSG00000262823	lncRNA	41.9012	-0.262267	0.0805001	-3.25798	0.0011221	0.00313298
AC127496.5	ENSG00000262873	lncRNA	5.07063	-0.433449	0.12874	-3.36686	0.0007603	0.00219085
AC110285.2	ENSG00000262877	lncRNA	62.0723	-0.524546	0.124115	-4.22629	2.37577e-05	8.99153e-05
AC015921.1	ENSG00000262884	lncRNA	2.27432	-0.438203	0.165059	-2.65483	0.00793489	0.0183495
AC027796.4	ENSG00000262903	lncRNA	28.8389	-0.302598	0.0844959	-3.58121	0.000342003	0.00105117
AC015853.1	ENSG00000262905	lncRNA	1.68833	-0.438541	0.143105	-3.06448	0.00218052	0.00573074
AC129507.4	ENSG00000262920	lncRNA	2.73833	-0.545493	0.135393	-4.02897	5.60207e-05	0.000198906
AC124319.1	ENSG00000262979	lncRNA	28.6357	-0.70735	0.125649	-5.62956	1.80668e-08	1.08461e-07
AC007114.1	ENSG00000263004	lncRNA	50.4888	-0.320768	0.0711769	-4.50663	6.58657e-06	2.72922e-05
AC108134.4	ENSG00000263011	lncRNA	3.26505	-0.276555	0.0882208	-3.1348	0.0017197	0.0046161
AC007220.1	ENSG00000263033	lncRNA	3.29461	-0.282285	0.116108	-2.43123	0.0150478	0.0323909
AC090617.5	ENSG00000263050	lncRNA	15.6194	-0.217861	0.0639605	-3.40618	0.000658787	0.00192162
AC024361.2	ENSG00000263063	lncRNA	3.10367	-0.284583	0.111031	-2.56309	0.0103745	0.0232697
ZNF213-AS1	ENSG00000263072	lncRNA	203.008	-0.210091	0.0485253	-4.32951	1.49441e-05	5.8403e-05
AC009171.2	ENSG00000263105	lncRNA	4.9318	-0.407217	0.0962494	-4.23085	2.32807e-05	8.82147e-05
AC040162.3	ENSG00000263126	lncRNA	39.1992	-0.326771	0.0663972	-4.92146	8.5903e-07	4.05831e-06
AC110285.3	ENSG00000263154	lncRNA	5.24884	-0.792835	0.196001	-4.04506	5.23102e-05	0.000186719
AC087500.2	ENSG00000263164	lncRNA	4.42642	-0.327697	0.114175	-2.87013	0.00410304	0.0101557
AC006111.2	ENSG00000263235	lncRNA	13.8415	-0.183818	0.0783444	-2.34628	0.018962	0.0397074
NFE2L1-DT	ENSG00000263412	lncRNA	16.0752	-0.203077	0.0899258	-2.25827	0.023929	0.0486482
AC015908.2	ENSG00000263508	lncRNA	6.50158	-0.526308	0.120678	-4.36126	1.29314e-05	5.10592e-05
AP000829.1	ENSG00000263551	lncRNA	0.895025	0.957709	0.373484	2.56426	0.0103396	0.0232009
AC091043.1	ENSG00000263588	lncRNA	21.3383	-0.25888	0.089244	-2.90081	0.00372195	0.00929976
AC127024.2	ENSG00000263603	lncRNA	3.79649	-0.688409	0.121123	-5.68353	1.31943e-08	8.06529e-08
AC023389.1	ENSG00000263657	lncRNA	1.32549	-0.354434	0.129992	-2.72658	0.00639942	0.0151217
AC007639.1	ENSG00000263680	lncRNA	5.39803	-0.278706	0.100598	-2.77051	0.00559692	0.013424
SEPTIN9-DT	ENSG00000263718	lncRNA	4.838	-0.453463	0.117997	-3.84302	0.000121531	0.0004058
AC145207.5	ENSG00000263731	lncRNA	172.808	-0.186498	0.0559452	-3.33358	0.000857345	0.0024483
SKAP1-AS1	ENSG00000263787	lncRNA	1.43033	-0.578174	0.146727	-3.94048	8.13176e-05	0.000280289
AC009831.1	ENSG00000263823	lncRNA	17.0255	-0.125506	0.0524611	-2.39236	0.0167403	0.0355774
AC080037.2	ENSG00000263893	lncRNA	30.5467	-0.289689	0.0766149	-3.7811	0.000156137	0.000511217
AC004253.1	ENSG00000263990	lncRNA	10.791	-0.372388	0.0861539	-4.32236	1.54367e-05	6.01192e-05
AC138207.2	ENSG00000264107	lncRNA	10.4253	-0.440103	0.0851731	-5.16715	2.37684e-07	1.21623e-06
AP005329.1	ENSG00000264235	lncRNA	15.6267	-0.531049	0.0885082	-6	1.97314e-09	1.34602e-08
AC016866.1	ENSG00000264269	lncRNA	7.73238	-0.19141	0.0835332	-2.29143	0.0219387	0.0451005
AC107982.2	ENSG00000264273	lncRNA	0.546759	-0.598804	0.194731	-3.07502	0.00210486	0.0055498
ZNF236-DT	ENSG00000264278	lncRNA	35.1628	-0.60191	0.0729306	-8.25318	1.54232e-16	2.59399e-15
AC006270.1	ENSG00000264513	lncRNA	0.345263	-0.71325	0.227235	-3.13881	0.00169633	0.00456298
AC008026.3	ENSG00000264546	lncRNA	2.06429	-0.432256	0.137734	-3.13835	0.00169903	0.00456895
AC132872.2	ENSG00000264548	lncRNA	8.18164	-0.282022	0.0928342	-3.03791	0.00238225	0.00621178
AC010761.1	ENSG00000264577	lncRNA	62.1739	-0.198213	0.0591069	-3.35346	0.000798079	0.00229173
AC020558.1	ENSG00000264666	lncRNA	1.86237	-0.572449	0.12325	-4.64461	3.40713e-06	1.47627e-05
AC090337.1	ENSG00000264705	lncRNA	0.695851	0.596458	0.181623	3.28404	0.0010233	0.00287793
AC005725.1	ENSG00000264727	lncRNA	18.1232	0.871415	0.245187	3.55409	0.000379292	0.0011563
AC016876.3	ENSG00000264772	lncRNA	49.6303	-0.36352	0.0536318	-6.77806	1.21797e-11	1.11205e-10
AC005722.4	ENSG00000264785	lncRNA	0.49885	-0.873908	0.260827	-3.35053	0.000806581	0.00231319
AC132938.3	ENSG00000264812	lncRNA	2.12422	-0.466855	0.116248	-4.01602	5.91899e-05	0.000209148
AC087749.2	ENSG00000264829	lncRNA	0.371928	-0.565961	0.217213	-2.60556	0.00917237	0.0208658
DSG2-AS1	ENSG00000264859	lncRNA	18.6807	-0.245615	0.0690422	-3.55746	0.000374455	0.00114292
AC018521.5	ENSG00000264920	lncRNA	60.7073	-0.254579	0.0610892	-4.16733	3.0819e-05	0.000114598
AC115989.1	ENSG00000264932	lncRNA	0.979313	0.57655	0.167433	3.44348	0.000574287	0.00169219
AC145343.1	ENSG00000265055	lncRNA	9.65691	-0.317708	0.0934184	-3.40092	0.000671602	0.00195542
C1QTNF1-AS1	ENSG00000265096	lncRNA	15.5806	-0.443072	0.112291	-3.94574	7.95545e-05	0.000274708
AC068594.1	ENSG00000265121	lncRNA	0.485626	-0.652854	0.20467	-3.1898	0.00142373	0.00389019
MIR133A1HG	ENSG00000265142	lncRNA	0.936267	0.500079	0.167059	2.99343	0.00275857	0.007091
TSPOAP1-AS1	ENSG00000265148	lncRNA	96.779	-0.235403	0.0823797	-2.85754	0.00426938	0.0105308
AP000894.2	ENSG00000265179	lncRNA	7.12606	0.633656	0.173803	3.64583	0.000266533	0.000835667
AC004687.1	ENSG00000265206	lncRNA	54.7468	-0.632515	0.126838	-4.98679	6.13915e-07	2.96443e-06
AC129926.1	ENSG00000265246	lncRNA	2.49869	-0.624216	0.218979	-2.85057	0.00436411	0.0107414
AC015917.2	ENSG00000265254	lncRNA	3.01503	-0.537071	0.119278	-4.50267	6.7105e-06	2.77907e-05
AC084125.4	ENSG00000265393	lncRNA	12.1674	-0.819363	0.0979771	-8.3628	6.12455e-17	1.07797e-15
AC104984.2	ENSG00000265394	lncRNA	0.83566	-0.404485	0.153369	-2.63733	0.00835614	0.0192137
AC100778.3	ENSG00000265496	lncRNA	3.05687	-0.316577	0.11398	-2.77747	0.00547839	0.0131769
AC020558.2	ENSG00000265511	lncRNA	16.8391	-0.31114	0.0824362	-3.77431	0.000160449	0.000524436
AP005271.1	ENSG00000265554	lncRNA	9.1961	-0.610537	0.18726	-3.26037	0.00111266	0.00311003
RARA-AS1	ENSG00000265666	lncRNA	105.172	-0.365406	0.0558225	-6.54585	5.91582e-11	4.93682e-10
MAFG-DT	ENSG00000265688	lncRNA	213.494	-0.323036	0.0591228	-5.46382	4.66e-08	2.64195e-07
LINC01970	ENSG00000265692	lncRNA	4.24409	-0.326522	0.0975834	-3.34608	0.000819638	0.00234834
AC104984.3	ENSG00000265739	lncRNA	0.724403	-0.646389	0.181913	-3.55328	0.000380457	0.00115929
LINC00668	ENSG00000265933	lncRNA	911.46	-0.294668	0.118687	-2.48274	0.0130376	0.0285331
GATA6-AS1	ENSG00000266010	lncRNA	121.103	-0.242326	0.0747271	-3.24282	0.00118353	0.00328817
NDUFV2-AS1	ENSG00000266053	lncRNA	26.3476	-0.128155	0.0527375	-2.43005	0.0150966	0.0324849
AC080112.1	ENSG00000266208	lncRNA	208.393	-0.216622	0.0633873	-3.41744	0.00063214	0.00184926
AC005224.2	ENSG00000266378	lncRNA	1.61608	-0.368157	0.161157	-2.28445	0.0223448	0.0458322
AC002091.2	ENSG00000266389	lncRNA	1.80154	0.532192	0.14641	3.63493	0.000278056	0.000868376
SNHG25	ENSG00000266402	lncRNA	241.899	-2.25133	0.155941	-14.4371	3.0243e-47	3.98676e-44
AC007448.4	ENSG00000266473	lncRNA	3.82509	-0.565123	0.1087	-5.19893	2.0044e-07	1.03451e-06
AP001381.1	ENSG00000266541	lncRNA	0.617992	-0.966533	0.201466	-4.7975	1.60656e-06	7.29506e-06
AC103810.5	ENSG00000266644	lncRNA	0.907934	0.514193	0.161599	3.18191	0.00146307	0.003988
AC093484.4	ENSG00000266651	lncRNA	20.177	-0.167243	0.0715946	-2.33598	0.0194924	0.0406423
AC044840.1	ENSG00000266696	lncRNA	0.349358	-0.84152	0.266824	-3.15384	0.0016114	0.00435198
AC021534.1	ENSG00000266711	lncRNA	1.62821	-1.22758	0.382155	-3.21224	0.00131703	0.00362691
AC079336.5	ENSG00000266718	lncRNA	18.7686	-0.202905	0.0890754	-2.27791	0.0227322	0.0465069
DSG1-AS1	ENSG00000266729	lncRNA	3.22782	-0.369584	0.152596	-2.42198	0.0154361	0.0331186
AC061975.6	ENSG00000266830	lncRNA	0.857612	-0.98339	0.276207	-3.56034	0.000370378	0.00113156
AC243964.3	ENSG00000266903	lncRNA	43.1988	-0.36347	0.0891514	-4.07699	4.56219e-05	0.000164551
AC067852.2	ENSG00000266962	lncRNA	150.482	-0.11317	0.0402416	-2.81226	0.0049194	0.011974
AP002449.1	ENSG00000266969	lncRNA	3.54989	0.606888	0.10674	5.68564	1.30322e-08	7.97003e-08
AC011511.2	ENSG00000266978	lncRNA	1.20706	-0.979655	0.216727	-4.52022	6.17768e-06	2.57066e-05
AC087289.1	ENSG00000266980	lncRNA	3.36455	-0.317	0.102023	-3.10714	0.00188904	0.00503144
AC008507.2	ENSG00000267006	lncRNA	0.720007	0.556282	0.159194	3.49437	0.000475184	0.0014241
AC023090.1	ENSG00000267015	lncRNA	4.59616	-0.79677	0.186085	-4.28175	1.85429e-05	7.14305e-05
AC005757.1	ENSG00000267044	lncRNA	0.784838	-0.367489	0.157923	-2.32701	0.0199648	0.0415208
AC092143.3	ENSG00000267048	lncRNA	4.80986	-0.807187	0.115179	-7.00812	2.41544e-12	2.38975e-11
AC002398.1	ENSG00000267049	lncRNA	23.8646	-0.138636	0.0594242	-2.33299	0.0196489	0.0409306
UXT-AS1	ENSG00000267064	lncRNA	16.0694	-0.203071	0.0643356	-3.15642	0.00159717	0.00431629
AC005256.1	ENSG00000267073	lncRNA	13.1191	-0.53381	0.173843	-3.07064	0.002136	0.00562266
AC015911.3	ENSG00000267074	lncRNA	5.30892	0.524795	0.111696	4.69843	2.62165e-06	1.15358e-05
AC020663.2	ENSG00000267077	lncRNA	31.9043	-0.896159	0.0989789	-9.05404	1.3778e-19	3.37208e-18
ASB16-AS1	ENSG00000267080	lncRNA	259.887	-0.0932558	0.0403681	-2.31014	0.0208806	0.0431734
AC008543.4	ENSG00000267089	lncRNA	2.11441	-0.295718	0.118373	-2.49818	0.0124832	0.0274407
AC027307.1	ENSG00000267092	lncRNA	5.30627	-0.647409	0.0976158	-6.63221	3.30699e-11	2.84851e-10
AC011511.3	ENSG00000267105	lncRNA	5.71592	-1.11093	0.16368	-6.78719	1.14342e-11	1.04774e-10
AC010525.1	ENSG00000267117	lncRNA	3.39366	-0.375554	0.104612	-3.58996	0.000330725	0.00101872
SCAT1	ENSG00000267123	lncRNA	17.9258	-0.390425	0.121104	-3.22389	0.00126463	0.00349469
AC008738.2	ENSG00000267130	lncRNA	9.1215	-0.313006	0.0893012	-3.50506	0.000456504	0.0013721
AP001120.2	ENSG00000267143	lncRNA	0.411647	-0.536316	0.225381	-2.3796	0.0173316	0.0366993
AC011472.2	ENSG00000267174	lncRNA	8.03581	-0.262857	0.075005	-3.50453	0.000457412	0.00137461
AC007773.1	ENSG00000267213	lncRNA	18.0817	-0.274155	0.0869115	-3.15442	0.00160819	0.00434391
AC010504.1	ENSG00000267219	lncRNA	8.23443	-0.164764	0.0588858	-2.79803	0.00514156	0.0124537
AC107993.1	ENSG00000267222	lncRNA	1.12768	-0.592193	0.157047	-3.77081	0.000162719	0.000531448
AC092067.1	ENSG00000267234	lncRNA	0.336288	-0.800609	0.231459	-3.45896	0.000542269	0.00160626
AC005381.1	ENSG00000267243	lncRNA	16.0803	-0.506069	0.170694	-2.96477	0.00302912	0.00773083
AC012615.6	ENSG00000267244	lncRNA	53.6906	-0.28631	0.0782911	-3.657	0.000255187	0.000802595
AC011498.3	ENSG00000267255	lncRNA	2.46173	-0.989895	0.152862	-6.47576	9.43344e-11	7.64697e-10
ERVE-1	ENSG00000267259	lncRNA	9.97289	-0.365777	0.12454	-2.93703	0.00331368	0.00838333
PARD6G-AS1	ENSG00000267270	lncRNA	33.6229	-0.491458	0.103453	-4.75054	2.02871e-06	9.08253e-06
LINC01140	ENSG00000267272	lncRNA	9.87493	0.613119	0.104849	5.84763	4.98637e-09	3.22e-08
AC024575.1	ENSG00000267277	lncRNA	12.6151	-0.341014	0.066891	-5.09806	3.43152e-07	1.71819e-06
TBX2-AS1	ENSG00000267280	lncRNA	11.5255	-0.345208	0.092086	-3.74875	0.000177715	0.000576143
AC011481.2	ENSG00000267282	lncRNA	4.75091	-0.555079	0.0857058	-6.47657	9.38314e-11	7.60942e-10
AC005306.1	ENSG00000267283	lncRNA	6.94748	-0.330656	0.0875058	-3.77868	0.000157665	0.000516042
AC068473.3	ENSG00000267287	lncRNA	5.43457	0.624939	0.135286	4.61939	3.84863e-06	1.6511e-05
AC008649.1	ENSG00000267291	lncRNA	0.677149	-0.766444	0.234853	-3.2635	0.00110046	0.00307864
CEBPA-DT	ENSG00000267296	lncRNA	264.626	-0.261586	0.0616266	-4.24469	2.18891e-05	8.33051e-05
AC027307.2	ENSG00000267317	lncRNA	149.07	-0.237995	0.052613	-4.52351	6.08219e-06	2.53368e-05
SNHG30	ENSG00000267321	lncRNA	286.408	-0.262283	0.0609412	-4.30387	1.67839e-05	6.50608e-05
SNHG22	ENSG00000267322	lncRNA	36.5659	-0.802919	0.0996543	-8.05704	7.81641e-16	1.2e-14
LINC01415	ENSG00000267325	lncRNA	3.97644	0.697192	0.10347	6.73814	1.6043e-11	1.43531e-10
AC002398.2	ENSG00000267328	lncRNA	0.932145	0.572697	0.247234	2.31642	0.0205356	0.0425527
AC087289.2	ENSG00000267342	lncRNA	15.1886	-0.466928	0.0723955	-6.44967	1.12091e-10	8.99483e-10
AC003070.1	ENSG00000267344	lncRNA	46.8313	-0.291765	0.0744198	-3.92053	8.83546e-05	0.000302608
GEMIN7-AS1	ENSG00000267348	lncRNA	15.1998	-0.321784	0.0642787	-5.00608	5.55508e-07	2.70081e-06
AC020928.2	ENSG00000267353	lncRNA	0.358324	0.611846	0.251041	2.43723	0.0148002	0.0319154
AC020931.1	ENSG00000267387	lncRNA	5.51044	-0.498091	0.100971	-4.93301	8.09714e-07	3.8429e-06
AC036176.1	ENSG00000267390	lncRNA	14.3487	-0.29345	0.0655831	-4.47447	7.66025e-06	3.14075e-05
DM1-AS	ENSG00000267395	lncRNA	18.6106	-0.325822	0.0699026	-4.66108	3.14558e-06	1.36821e-05
AC005180.1	ENSG00000267405	lncRNA	2.92555	1.05833	0.196288	5.39171	6.97904e-08	3.86333e-07
AD000671.3	ENSG00000267439	lncRNA	2.53291	-0.304658	0.0953529	-3.19506	0.00139802	0.00382461
LINC02073	ENSG00000267452	lncRNA	2.7109	0.627979	0.135353	4.63955	3.49161e-06	1.50911e-05
AC027319.1	ENSG00000267484	lncRNA	5.5139	-0.682483	0.108206	-6.30725	2.84029e-10	2.15693e-09
CIRBP-AS1	ENSG00000267493	lncRNA	34.1605	-0.197886	0.0667964	-2.96253	0.00305123	0.00778259
AC007786.1	ENSG00000267498	lncRNA	2.58354	-0.354625	0.109316	-3.24404	0.00117847	0.003276
AC005180.2	ENSG00000267505	lncRNA	4.37972	0.930453	0.181184	5.1354	2.81539e-07	1.42783e-06
AC011446.1	ENSG00000267512	lncRNA	1.95127	-0.56653	0.13723	-4.12833	3.65403e-05	0.000134111
AC020916.1	ENSG00000267519	lncRNA	865.801	-0.444498	0.0796599	-5.57995	2.40584e-08	1.42263e-07
LINC01836	ENSG00000267530	lncRNA	21.6895	-0.229556	0.100111	-2.29301	0.0218476	0.0449461
AC011471.2	ENSG00000267563	lncRNA	0.287166	-0.788686	0.260958	-3.02227	0.00250885	0.00651037
AC008686.1	ENSG00000267633	lncRNA	1.19229	-0.624426	0.183664	-3.39982	0.000674292	0.00196277
AC010327.5	ENSG00000267649	lncRNA	9.87059	-0.185972	0.0793749	-2.34296	0.0191317	0.0400049
ERVK-28	ENSG00000267696	lncRNA	0.448126	-0.977518	0.294532	-3.31889	0.000903753	0.0025676
AC002116.2	ENSG00000267698	lncRNA	21.2206	-0.369618	0.0622733	-5.93541	2.93104e-09	1.95551e-08
AC020917.2	ENSG00000267703	lncRNA	0.448324	-0.706233	0.203568	-3.46927	0.000521866	0.00155039
LINC01539	ENSG00000267712	lncRNA	0.539593	0.597744	0.218175	2.73974	0.00614877	0.0145974
AL121989.1	ENSG00000267734	lncRNA	0.839048	-1.12986	0.211014	-5.35443	8.58256e-08	4.69389e-07
AC060766.7	ENSG00000267745	lncRNA	9.25016	0.583945	0.0887945	6.57637	4.82081e-11	4.06767e-10
AC009005.1	ENSG00000267751	lncRNA	89.7808	-0.556876	0.0859325	-6.48039	9.14885e-11	7.43361e-10
EML2-AS1	ENSG00000267757	lncRNA	0.285205	-0.687099	0.231797	-2.96422	0.00303449	0.00774352
AC099811.4	ENSG00000267758	lncRNA	0.595094	0.584383	0.165324	3.53478	0.000408108	0.00123714
AC093567.1	ENSG00000267764	lncRNA	0.953951	0.598176	0.15601	3.83423	0.00012596	0.000419673
AC011498.6	ENSG00000267769	lncRNA	7.79074	-0.433653	0.0956485	-4.53382	5.79274e-06	2.41917e-05
AC004221.1	ENSG00000267778	lncRNA	1.30627	-0.512671	0.161346	-3.17746	0.00148573	0.00404314
AC087289.5	ENSG00000267801	lncRNA	32.6004	-0.193852	0.0664723	-2.91628	0.0035423	0.00889647
AP001160.2	ENSG00000267811	lncRNA	3.38182	-0.326729	0.0950846	-3.43619	0.000589951	0.001735
AL592211.1	ENSG00000267834	lncRNA	4.68508	-0.406118	0.0988009	-4.11046	3.94864e-05	0.000144066
AC245884.8	ENSG00000267838	lncRNA	29.9722	-0.6117	0.0801208	-7.63472	2.2631e-14	2.89933e-13
AL356740.1	ENSG00000267868	lncRNA	39.7151	-0.520493	0.0862472	-6.0349	1.59061e-09	1.09741e-08
ZNF460-AS1	ENSG00000267871	lncRNA	17.0829	-0.203177	0.0737111	-2.7564	0.00584407	0.0139468
AC022144.1	ENSG00000267892	lncRNA	35.8988	-0.267978	0.102943	-2.60317	0.00923662	0.020997
AC139769.2	ENSG00000267924	lncRNA	2.76877	-0.407925	0.181091	-2.25259	0.0242849	0.0492827
AC010300.1	ENSG00000267934	lncRNA	28.3609	-0.323916	0.0995869	-3.2526	0.00114355	0.00318799
AC011523.1	ENSG00000267968	lncRNA	10.3299	-0.611505	0.175716	-3.48007	0.000501277	0.0014955
AC007292.1	ENSG00000267980	lncRNA	18.4023	-0.2107	0.059465	-3.54326	0.000395215	0.00120177
AC008750.3	ENSG00000267984	lncRNA	4.40608	-1.77078	0.192437	-9.2019	3.51668e-20	9.26527e-19
AC018766.1	ENSG00000268047	lncRNA	5.33865	-0.615901	0.117712	-5.23227	1.67445e-07	8.75323e-07
AC020913.1	ENSG00000268056	lncRNA	0.551321	-0.546818	0.179221	-3.05108	0.00228017	0.00596964
NAPA-AS1	ENSG00000268061	lncRNA	42.8304	-0.565271	0.0608319	-9.29234	1.50931e-20	4.17205e-19
AC123912.1	ENSG00000268081	lncRNA	1.7996	0.601424	0.183449	3.27843	0.00104385	0.00293143
AC005785.1	ENSG00000268189	lncRNA	24.7598	-0.546967	0.0736239	-7.42921	1.09249e-13	1.28468e-12
AIRN	ENSG00000268257	lncRNA	0.786693	-0.708031	0.232426	-3.04626	0.00231705	0.00605873
LINC02560	ENSG00000268307	lncRNA	3.96143	-0.509464	0.164245	-3.10186	0.00192309	0.00511287
AL132655.1	ENSG00000268333	lncRNA	1.71832	0.638866	0.237584	2.68901	0.00716645	0.0167451
AC020915.2	ENSG00000268516	lncRNA	107.98	-0.250525	0.0520521	-4.81296	1.48712e-06	6.78578e-06
AC005523.1	ENSG00000268536	lncRNA	1.1673	-0.573516	0.148207	-3.8697	0.000108969	0.000367002
RAET1E-AS1	ENSG00000268592	lncRNA	29.9834	-1.12722	0.159594	-7.06305	1.62884e-12	1.64168e-11
AC053503.4	ENSG00000268603	lncRNA	5.48608	-0.393974	0.0811668	-4.85388	1.21067e-06	5.59982e-06
AC005759.1	ENSG00000268650	lncRNA	1.07942	-0.509264	0.145613	-3.49738	0.000469848	0.00140932
AC004597.1	ENSG00000268673	lncRNA	0.471514	1.02591	0.44741	2.293	0.0218482	0.0449461
AC010643.1	ENSG00000268686	lncRNA	15.2782	0.770003	0.170707	4.51068	6.46206e-06	2.67966e-05
AL158151.4	ENSG00000268707	lncRNA	2.97969	-0.433499	0.128145	-3.38288	0.000717299	0.00207598
AC005261.3	ENSG00000268713	lncRNA	89.2719	-0.185416	0.0510018	-3.63549	0.000277458	0.00086665
AC245128.3	ENSG00000268734	lncRNA	7.40283	0.500354	0.166435	3.00631	0.00264438	0.00682778
AC010519.1	ENSG00000268746	lncRNA	1.29346	-0.417734	0.155748	-2.68211	0.00731603	0.0170643
SCGB1B2P	ENSG00000268751	lncRNA	8.64599	-0.501802	0.0871666	-5.75682	8.57155e-09	5.3648e-08
AC004264.1	ENSG00000268812	lncRNA	19.264	-0.325306	0.0806064	-4.03573	5.44322e-05	0.000193607
Z69706.1	ENSG00000268836	lncRNA	22.517	-0.826465	0.0920739	-8.9761	2.80534e-19	6.63647e-18
AC011473.3	ENSG00000268906	lncRNA	0.71377	-0.669694	0.251327	-2.66463	0.00770723	0.0178862
AC005387.1	ENSG00000268938	lncRNA	4.48541	-0.491398	0.0904993	-5.42985	5.64012e-08	3.16338e-07
AC010422.2	ENSG00000268945	lncRNA	4.52476	-0.245008	0.0984831	-2.48782	0.0128528	0.0281545
AC024075.2	ENSG00000269044	lncRNA	136.564	-0.191492	0.0477121	-4.01349	5.98273e-05	0.000211224
AC063977.6	ENSG00000269072	lncRNA	0.871828	0.512199	0.177932	2.87863	0.00399409	0.00991237
AL137002.1	ENSG00000269125	lncRNA	2.73284	-0.698765	0.134937	-5.17843	2.23757e-07	1.14849e-06
AC011443.1	ENSG00000269172	lncRNA	0.636446	-0.735033	0.218064	-3.37073	0.000749699	0.00216239
L34079.2	ENSG00000269177	lncRNA	0.973643	-0.906943	0.211854	-4.28099	1.86065e-05	7.16354e-05
AC005387.2	ENSG00000269191	lncRNA	4.23913	-0.250574	0.0862686	-2.90458	0.00367747	0.00919704
AC006942.1	ENSG00000269194	lncRNA	5.08478	-0.578408	0.102596	-5.63772	1.72318e-08	1.03708e-07
AC008894.2	ENSG00000269243	lncRNA	5.82136	-0.219168	0.089129	-2.459	0.0139324	0.0302785
AC011445.1	ENSG00000269246	lncRNA	3.95207	-0.328482	0.116366	-2.82283	0.00476025	0.0116259
AC020922.3	ENSG00000269275	lncRNA	3.34048	-0.452375	0.117316	-3.85603	0.000115241	0.000386148
ZSCAN16-AS1	ENSG00000269293	lncRNA	81.7631	-0.370291	0.0667014	-5.55147	2.83277e-08	1.65739e-07
AC007292.2	ENSG00000269318	lncRNA	14.1844	-0.271754	0.0628624	-4.32299	1.53927e-05	5.99661e-05
PTOV1-AS2	ENSG00000269352	lncRNA	91.4141	-0.309087	0.0660309	-4.68095	2.85555e-06	1.24802e-05
AC120349.1	ENSG00000269365	lncRNA	1.25745	-1.11504	0.212018	-5.25916	1.44715e-07	7.63394e-07
RAB11B-AS1	ENSG00000269386	lncRNA	92.0963	-0.440669	0.0474902	-9.27914	1.70851e-20	4.68204e-19
AC008764.6	ENSG00000269399	lncRNA	41.5223	-0.152177	0.0623819	-2.43944	0.0147102	0.0317481
PLA2G4C-AS1	ENSG00000269420	lncRNA	2.44924	-0.398047	0.136664	-2.91258	0.00358454	0.00899228
AC010618.3	ENSG00000269439	lncRNA	29.8298	-0.162923	0.0519781	-3.13445	0.00172178	0.00462102
AP001160.4	ENSG00000269463	lncRNA	3.75102	-0.462015	0.102823	-4.49331	7.01242e-06	2.8947e-05
AC020913.2	ENSG00000269480	lncRNA	1.00833	-0.353172	0.149419	-2.36364	0.0180965	0.0381246
AC010319.4	ENSG00000269481	lncRNA	11.1704	-0.238698	0.0680034	-3.5101	0.000447946	0.00134786
AC008635.2	ENSG00000269487	lncRNA	2.07015	-0.423747	0.123486	-3.43154	0.000600162	0.00176286
U62631.1	ENSG00000269553	lncRNA	1.12404	1.15436	0.231307	4.99059	6.01939e-07	2.91248e-06
AP001350.1	ENSG00000269570	lncRNA	3.08389	0.544915	0.0948085	5.74753	9.0555e-09	5.65566e-08
RPARP-AS1	ENSG00000269609	lncRNA	399.877	-0.191312	0.0475882	-4.02016	5.8158e-05	0.000205825
AC010487.1	ENSG00000269646	lncRNA	10.0642	-0.279986	0.0972295	-2.87964	0.00398124	0.00988367
AC011479.3	ENSG00000269653	lncRNA	3.58964	-0.430961	0.106166	-4.05931	4.92187e-05	0.000176525
NOP53-AS1	ENSG00000269656	lncRNA	6.38873	-0.259687	0.075571	-3.43633	0.000589656	0.00173426
BICRA-AS1	ENSG00000269806	lncRNA	0.569184	-0.793688	0.250286	-3.17113	0.00151849	0.00412524
SNHG8	ENSG00000269893	lncRNA	1622.49	-0.61212	0.0515025	-11.8852	1.41229e-32	1.60209e-30
RMRP	ENSG00000269900	lncRNA	0.433393	-0.634029	0.231618	-2.73739	0.0061929	0.0146848
AC234772.2	ENSG00000269902	lncRNA	1.02305	-0.529859	0.213702	-2.47943	0.0131592	0.0287728
MIRLET7A1HG	ENSG00000269929	lncRNA	3.15612	0.60922	0.12924	4.71387	2.43057e-06	1.07507e-05
AL031429.2	ENSG00000269933	lncRNA	1.01311	0.541776	0.199148	2.72047	0.00651895	0.0153721
AL353593.1	ENSG00000269934	lncRNA	2.59207	0.669933	0.131333	5.10102	3.37824e-07	1.69417e-06
AL049840.5	ENSG00000269940	lncRNA	22.4944	0.537059	0.0698461	7.68918	1.48086e-14	1.94209e-13
AC135178.6	ENSG00000269947	lncRNA	14.2127	-0.411877	0.0716691	-5.74693	9.08786e-09	5.67401e-08
AC069307.1	ENSG00000269949	lncRNA	11.1647	-0.293742	0.0811088	-3.62158	0.000292807	0.000910948
AL049840.6	ENSG00000269958	lncRNA	214.126	-0.237663	0.0472093	-5.03424	4.79758e-07	2.35197e-06
AL020997.2	ENSG00000269971	lncRNA	1.02401	-0.383286	0.139974	-2.73827	0.00617636	0.0146538
AC010969.2	ENSG00000269973	lncRNA	110.726	-0.17661	0.0486327	-3.6315	0.000281777	0.000878779
AL021328.1	ENSG00000269985	lncRNA	1.78892	-0.617403	0.234086	-2.63751	0.00835171	0.0192058
AC010531.6	ENSG00000270006	lncRNA	16.7384	-0.506417	0.0952801	-5.31503	1.06638e-07	5.74908e-07
Z93241.1	ENSG00000270022	lncRNA	1.12504	-0.392564	0.167552	-2.34294	0.0191323	0.0400049
AC009061.2	ENSG00000270049	lncRNA	26.6833	-0.247864	0.0542542	-4.56856	4.91081e-06	2.07465e-05
AL356488.2	ENSG00000270066	lncRNA	0.896524	-1.41459	0.202208	-6.99574	2.63869e-12	2.59986e-11
AC090559.2	ENSG00000270072	lncRNA	0.471923	-0.560314	0.22036	-2.54272	0.0109993	0.0244971
AL353593.2	ENSG00000270110	lncRNA	0.966921	0.79219	0.207487	3.81802	0.00013453	0.000445893
AC023509.3	ENSG00000270175	lncRNA	26.0285	-0.25074	0.0666993	-3.75926	0.00017042	0.00055438
AC004080.4	ENSG00000270182	lncRNA	11.8203	-0.348882	0.139443	-2.50196	0.0123506	0.0271757
AC016773.2	ENSG00000270195	lncRNA	24.7333	-0.510223	0.0784861	-6.5008	7.98927e-11	6.53588e-10
AC104695.2	ENSG00000270210	lncRNA	13.9554	-0.278303	0.0857374	-3.246	0.00117039	0.00325591
AC008738.6	ENSG00000270212	lncRNA	0.45868	-0.595388	0.217864	-2.73284	0.0062791	0.0148634
AP001554.1	ENSG00000270403	lncRNA	6.36874	-0.728076	0.157291	-4.62885	3.67698e-06	1.58207e-05
AL136084.2	ENSG00000270412	lncRNA	9.40303	0.916135	0.119287	7.68007	1.59005e-14	2.07957e-13
AC106900.1	ENSG00000270460	lncRNA	18.1455	-0.375122	0.0866176	-4.33079	1.48577e-05	5.80951e-05
LINC01235	ENSG00000270547	lncRNA	46.6248	0.676502	0.113466	5.96217	2.4891e-09	1.67616e-08
PKD1P6-NPIPP1	ENSG00000270580	lncRNA	41.0822	-0.241807	0.0687441	-3.51749	0.000435653	0.00131356
AC104695.3	ENSG00000270640	lncRNA	6.29239	-0.331061	0.129973	-2.54715	0.0108608	0.0242224
YTHDF3-AS1	ENSG00000270673	lncRNA	34.8603	-0.535247	0.0771488	-6.93785	3.98103e-12	3.85235e-11
AD001527.1	ENSG00000270760	lncRNA	3.96467	-0.42694	0.0974317	-4.38194	1.17625e-05	4.6816e-05
AL355353.1	ENSG00000270761	lncRNA	26.6437	-0.43269	0.0722027	-5.99271	2.06373e-09	1.40432e-08
LINC00221	ENSG00000270816	lncRNA	0.622308	1.07205	0.376949	2.84401	0.00445494	0.0109368
AC108451.2	ENSG00000270919	lncRNA	0.937045	-0.710038	0.312963	-2.26876	0.0232827	0.0474928
AC010719.1	ENSG00000270933	lncRNA	79.9047	-0.230961	0.0947065	-2.4387	0.0147402	0.031804
AC019257.2	ENSG00000270988	lncRNA	3.72763	-0.285833	0.105455	-2.71048	0.00671852	0.0157969
AC007029.1	ENSG00000271185	lncRNA	1.22315	-0.909349	0.151764	-5.99184	2.07481e-09	1.41135e-08
AC099791.2	ENSG00000271200	lncRNA	2.56809	-0.712795	0.129833	-5.49007	4.01765e-08	2.29754e-07
AC091488.1	ENSG00000271320	lncRNA	1.99876	-0.568446	0.159752	-3.5583	0.000373263	0.00113982
AL451085.2	ENSG00000271380	lncRNA	11.5432	-0.234234	0.0694809	-3.3712	0.000748424	0.00215903
AL161729.3	ENSG00000271384	lncRNA	4.50658	-0.521653	0.109845	-4.74901	2.04416e-06	9.14417e-06
AL445228.3	ENSG00000271387	lncRNA	4.38318	-0.330994	0.118399	-2.79559	0.00518048	0.0125345
AL109936.3	ENSG00000271420	lncRNA	15.5473	-0.490701	0.10222	-4.80046	1.58302e-06	7.19587e-06
AC016831.5	ENSG00000271522	lncRNA	0.913252	-1.05379	0.275515	-3.8248	0.00013088	0.000434589
AC078880.3	ENSG00000271579	lncRNA	1.55069	-0.529774	0.194515	-2.72356	0.00645822	0.0152468
AC108463.3	ENSG00000271590	lncRNA	2.9808	0.544923	0.110617	4.9262	8.38439e-07	3.9679e-06
AC099343.3	ENSG00000271646	lncRNA	73.7957	-0.221496	0.0565332	-3.91797	8.92968e-05	0.000305616
AC010501.2	ENSG00000271714	lncRNA	3.9948	-0.346763	0.127579	-2.71801	0.00656752	0.0154743
AC012640.3	ENSG00000271715	lncRNA	2.00123	-0.403627	0.161212	-2.5037	0.0122902	0.0270523
AL390208.1	ENSG00000271730	lncRNA	8.97371	0.814203	0.130784	6.22556	4.79848e-10	3.53792e-09
LINC02772	ENSG00000271736	lncRNA	1.04901	0.872465	0.214726	4.06315	4.84149e-05	0.000173887
AC008608.2	ENSG00000271737	lncRNA	31.8357	-0.654117	0.0879115	-7.44063	1.00204e-13	1.18305e-12
AF287957.1	ENSG00000271743	lncRNA	2.99704	-0.333487	0.126528	-2.63567	0.00839706	0.0192904
AL118558.3	ENSG00000271780	lncRNA	44.8651	-0.319609	0.0650703	-4.91175	9.02688e-07	4.24672e-06
AC026740.1	ENSG00000271781	lncRNA	31.5947	-0.362523	0.103954	-3.48735	0.000487826	0.00145867
AL080317.1	ENSG00000271789	lncRNA	14.1478	-0.16791	0.0722606	-2.32367	0.020143	0.0418435
AL590822.2	ENSG00000271806	lncRNA	4.29947	-0.504582	0.109399	-4.61232	3.98198e-06	1.70505e-05
Z97200.1	ENSG00000271811	lncRNA	4.04917	-0.428698	0.166381	-2.5766	0.00997764	0.022477
AC008897.3	ENSG00000271815	lncRNA	6.8843	-0.422811	0.0909948	-4.64655	3.37538e-06	1.46317e-05
AL445222.2	ENSG00000271833	lncRNA	11.1367	-0.370119	0.0826358	-4.47892	7.50226e-06	3.08192e-05
AC073195.1	ENSG00000271855	lncRNA	13.0553	-0.26947	0.0726734	-3.70796	0.000208933	0.00066828
LINC01215	ENSG00000271856	lncRNA	10.2366	0.687706	0.130533	5.26846	1.37576e-07	7.28144e-07
CYB561D2	ENSG00000271858	lncRNA	36.7129	-0.383102	0.0681652	-5.6202	1.90732e-08	1.14251e-07
AC114810.1	ENSG00000271868	lncRNA	7.52754	-0.269453	0.0710542	-3.79222	0.000149306	0.000490447
AC026979.2	ENSG00000271869	lncRNA	19.6341	-0.313873	0.0824583	-3.80644	0.000140979	0.000465535
AC016747.2	ENSG00000271889	lncRNA	0.709399	0.680299	0.185768	3.66208	0.000250173	0.000787994
AC034236.2	ENSG00000271918	lncRNA	31.014	-0.283914	0.0624461	-4.54654	5.45338e-06	2.28669e-05
AC016877.3	ENSG00000271930	lncRNA	2.94762	0.528285	0.166694	3.16919	0.00152865	0.004149
AC012073.1	ENSG00000271936	lncRNA	40.9627	-0.129282	0.0532145	-2.42945	0.0151216	0.0325332
AC104187.1	ENSG00000271937	lncRNA	1.89963	-0.729542	0.139265	-5.23853	1.61859e-07	8.47167e-07
U47924.1	ENSG00000271969	lncRNA	4.98375	-0.562082	0.0955814	-5.88066	4.08641e-09	2.67224e-08
AC012640.4	ENSG00000271980	lncRNA	7.72373	-0.31808	0.0826129	-3.85025	0.000118	0.000394629
AL008726.1	ENSG00000271984	lncRNA	6.10485	-0.30558	0.0960817	-3.18042	0.00147063	0.0040069
AL354872.1	ENSG00000271992	lncRNA	9.95023	-0.308479	0.0915273	-3.37035	0.000750718	0.00216483
AL365181.2	ENSG00000272068	lncRNA	144.186	-0.278303	0.107464	-2.58972	0.00960535	0.0217305
AL139423.1	ENSG00000272078	lncRNA	32.188	-0.218481	0.0672809	-3.24729	0.00116509	0.00324305
AC004233.2	ENSG00000272079	lncRNA	144.419	-0.282838	0.091788	-3.08143	0.0020601	0.00544267
AL137127.1	ENSG00000272084	lncRNA	21.2692	-0.384582	0.0663554	-5.7958	6.79972e-09	4.31303e-08
AC025181.2	ENSG00000272086	lncRNA	121.157	-0.183023	0.0621518	-2.94477	0.00323194	0.00819595
AC087623.2	ENSG00000272092	lncRNA	12.3201	-0.280815	0.0813239	-3.45305	0.000554284	0.00163716
AL024498.1	ENSG00000272097	lncRNA	12.402	-0.167749	0.063091	-2.65885	0.00784077	0.0181646
AL513218.1	ENSG00000272100	lncRNA	4.60573	-0.291065	0.0894876	-3.25257	0.00114367	0.00318809
AL691432.2	ENSG00000272106	lncRNA	113.323	-0.155317	0.0502934	-3.08822	0.0020136	0.00533163
AC233992.3	ENSG00000272115	lncRNA	9.7764	-0.314838	0.083332	-3.77811	0.000158023	0.000517169
LINC01607	ENSG00000272138	lncRNA	6.81868	-0.503577	0.106361	-4.7346	2.19484e-06	9.77247e-06
AL390719.2	ENSG00000272141	lncRNA	492.312	-0.730028	0.0837018	-8.72178	2.73869e-18	5.69628e-17
FGF14-AS2	ENSG00000272143	lncRNA	9.581	0.635527	0.10895	5.83317	5.43836e-09	3.4977e-08
ARF4-AS1	ENSG00000272146	lncRNA	7.67163	-0.529092	0.0852618	-6.2055	5.45227e-10	3.99454e-09
AC055822.1	ENSG00000272155	lncRNA	9.70305	-0.226255	0.070663	-3.20189	0.0013653	0.00374473
AL355385.1	ENSG00000272170	lncRNA	6.03319	-0.344238	0.0904696	-3.80501	0.0001418	0.000467961
AC138696.2	ENSG00000272172	lncRNA	14.8945	-0.564718	0.081862	-6.89842	5.25847e-12	5.02063e-11
U47924.2	ENSG00000272173	lncRNA	18.5226	-0.292158	0.0728646	-4.0096	6.08216e-05	0.000214497
AC011306.1	ENSG00000272180	lncRNA	0.8051	0.542891	0.198537	2.73446	0.00624832	0.0147997
AC005041.3	ENSG00000272183	lncRNA	15.0339	-0.220472	0.0819195	-2.69133	0.00711685	0.0166455
AP003392.5	ENSG00000272186	lncRNA	3.29068	-0.208582	0.0880642	-2.36852	0.0178595	0.0376897
AC097358.2	ENSG00000272202	lncRNA	3.08044	-0.459376	0.111402	-4.12358	3.73022e-05	0.000136632
AL451050.2	ENSG00000272205	lncRNA	13.844	-0.306081	0.0873529	-3.50396	0.000458391	0.00137712
AL645933.2	ENSG00000272221	lncRNA	49.568	-0.211731	0.0722942	-2.92874	0.00340341	0.00858471
AC044849.1	ENSG00000272256	lncRNA	2.77147	-0.4106	0.0998661	-4.11151	3.93088e-05	0.000143487
AC034198.2	ENSG00000272263	lncRNA	5.00182	-0.199267	0.0835633	-2.38462	0.0170966	0.0362659
AC009686.2	ENSG00000272264	lncRNA	21.0456	-0.531349	0.0887703	-5.98566	2.15516e-09	1.46262e-08
AC021242.3	ENSG00000272267	lncRNA	4.47048	-0.264263	0.0882086	-2.99588	0.0027365	0.00704137
AL138724.1	ENSG00000272269	lncRNA	28.3936	-0.442182	0.057962	-7.62882	2.3691e-14	3.03006e-13
IER3-AS1	ENSG00000272273	lncRNA	17.0403	-0.304611	0.0817858	-3.7245	0.000195704	0.000629495
AL031963.3	ENSG00000272277	lncRNA	10.392	-0.514048	0.0820521	-6.2649	3.73076e-10	2.78724e-09
AL451165.2	ENSG00000272288	lncRNA	60.1953	-0.337363	0.0545083	-6.18921	6.04672e-10	4.3997e-09
AP003355.2	ENSG00000272321	lncRNA	0.480052	0.665168	0.242401	2.74408	0.00606807	0.0144238
AC002044.1	ENSG00000272330	lncRNA	1.29169	-0.670073	0.210265	-3.18681	0.00143851	0.00392609
AC067838.1	ENSG00000272338	lncRNA	26.4928	-0.354	0.0692496	-5.11194	3.1887e-07	1.6065e-06
AC116351.2	ENSG00000272347	lncRNA	21.8058	-0.384944	0.10805	-3.56265	0.000367127	0.00112261
AC092354.1	ENSG00000272354	lncRNA	1.97439	-0.313723	0.103098	-3.04297	0.00234255	0.00611829
AC074032.1	ENSG00000272368	lncRNA	25.499	-0.334864	0.0677395	-4.94341	7.67664e-07	3.65832e-06
AC008035.1	ENSG00000272369	lncRNA	11.1091	-0.524067	0.0819057	-6.39842	1.56992e-10	1.23465e-09
AC009102.2	ENSG00000272372	lncRNA	1.26992	0.936044	0.200386	4.67119	2.99455e-06	1.30564e-05
AC016405.3	ENSG00000272384	lncRNA	6.26586	-0.208423	0.0845854	-2.46406	0.0137373	0.0299062
AL365181.3	ENSG00000272405	lncRNA	1168.86	-0.294868	0.0753169	-3.91503	9.03932e-05	0.000309119
BX284668.6	ENSG00000272426	lncRNA	1.60103	-0.316201	0.124801	-2.53363	0.0112886	0.025067
AL031432.3	ENSG00000272432	lncRNA	3.07275	-0.213374	0.0877376	-2.43195	0.0150176	0.0323369
AC137630.3	ENSG00000272434	lncRNA	8.74417	-0.938461	0.1251	-7.50167	6.30115e-14	7.60374e-13
AL118558.4	ENSG00000272444	lncRNA	10.2189	-0.355079	0.090075	-3.94204	8.07902e-05	0.000278597
AL135925.1	ENSG00000272447	lncRNA	33.6178	-0.245318	0.065701	-3.73385	0.000188578	0.00060806
AL139246.5	ENSG00000272449	lncRNA	56.5489	-0.703366	0.0729744	-9.63853	5.49673e-22	1.80218e-20
AC139795.3	ENSG00000272459	lncRNA	5.86749	-0.341507	0.0906421	-3.76764	0.000164799	0.000537552
AL645608.7	ENSG00000272512	lncRNA	30.4867	-0.42767	0.105335	-4.06009	4.90541e-05	0.000175984
LINC01023	ENSG00000272523	lncRNA	35.5838	-0.587688	0.0729274	-8.05854	7.72139e-16	1.18753e-14
LINC02538	ENSG00000272549	lncRNA	24.9047	-0.351416	0.111707	-3.14588	0.0016559	0.00446208
AC005162.2	ENSG00000272568	lncRNA	18.6359	0.531427	0.172868	3.07417	0.00211087	0.00556297
AL138762.1	ENSG00000272572	lncRNA	8.30105	-0.180345	0.0772519	-2.33451	0.019569	0.0407819
AC027271.1	ENSG00000272576	lncRNA	3.97896	-0.36395	0.100456	-3.62296	0.000291249	0.000906618
AFAP1-AS1	ENSG00000272620	lncRNA	204.179	-0.712112	0.22707	-3.13609	0.00171216	0.00459844
AC079766.1	ENSG00000272646	lncRNA	2.6711	-0.363677	0.0977762	-3.71948	0.000199631	0.000641049
AC090425.2	ENSG00000272660	lncRNA	4.77122	-0.345467	0.0828488	-4.16985	3.04794e-05	0.000113445
AC012306.2	ENSG00000272667	lncRNA	38.3649	-0.34075	0.0574072	-5.93566	2.92657e-09	1.95321e-08
AL021707.6	ENSG00000272669	lncRNA	49.1748	-0.631076	0.0780832	-8.0821	6.36626e-16	9.90138e-15
AC124016.1	ENSG00000272677	lncRNA	10.1835	-0.474352	0.0773461	-6.13285	8.63183e-10	6.14156e-09
AL359091.3	ENSG00000272696	lncRNA	7.39016	-0.359807	0.0778854	-4.61969	3.84314e-06	1.64893e-05
MESTIT1	ENSG00000272701	lncRNA	15.36	-0.374325	0.0663106	-5.64503	1.65156e-08	9.96487e-08
AC010913.1	ENSG00000272702	lncRNA	11.3281	-0.807703	0.0996688	-8.10387	5.32397e-16	8.38262e-15
AL157904.1	ENSG00000272715	lncRNA	1.8535	-0.32292	0.111083	-2.90701	0.00364905	0.00913433
AL022322.1	ENSG00000272720	lncRNA	64.1994	-0.267285	0.0784916	-3.40527	0.000660994	0.00192721
ADIRF-AS1	ENSG00000272734	lncRNA	124.452	-0.377718	0.0866219	-4.36054	1.29744e-05	5.12129e-05
STAG3L5P-PVRIG2P-PILRB	ENSG00000272752	lncRNA	82.3135	-0.190665	0.0743736	-2.56362	0.0103588	0.0232371
AC103702.2	ENSG00000272763	lncRNA	1091.59	-0.22122	0.0853426	-2.59214	0.00953814	0.0215926
JMJD1C-AS1	ENSG00000272767	lncRNA	10.4785	-0.305682	0.0736992	-4.14769	3.3584e-05	0.000124251
AC004854.2	ENSG00000272768	lncRNA	13.2137	-0.343382	0.104875	-3.27422	0.00105956	0.00297226
AC019131.2	ENSG00000272777	lncRNA	20.2619	-0.150802	0.0628066	-2.40106	0.0163478	0.034842
AC253536.6	ENSG00000272787	lncRNA	16.9372	-0.513834	0.073282	-7.01174	2.35371e-12	2.33048e-11
AP000864.1	ENSG00000272788	lncRNA	1.16964	-0.588361	0.181358	-3.2442	0.00117781	0.00327441
AC015712.6	ENSG00000272808	lncRNA	6.36914	0.506214	0.143809	3.52004	0.000431486	0.00130151
AL359198.1	ENSG00000272817	lncRNA	2.63021	-0.360584	0.105775	-3.40897	0.000652075	0.0019032
U62317.1	ENSG00000272821	lncRNA	102.434	-0.447875	0.0629269	-7.11739	1.09992e-12	1.13339e-11
AC092902.2	ENSG00000272840	lncRNA	2.90461	-0.45049	0.144377	-3.12024	0.00180704	0.00483262
AL139393.3	ENSG00000272841	lncRNA	43.8353	0.562178	0.0930198	6.04364	1.50679e-09	1.0424e-08
AL135910.1	ENSG00000272848	lncRNA	4.88001	-0.357839	0.105327	-3.3974	0.000680284	0.00197889
AC069544.1	ENSG00000272853	lncRNA	24.3082	-0.275516	0.0653124	-4.21843	2.46013e-05	9.2878e-05
Z93930.3	ENSG00000272858	lncRNA	5.45138	-0.193303	0.0799264	-2.41852	0.0155838	0.0333962
AC006033.2	ENSG00000272908	lncRNA	6.9459	0.702134	0.101927	6.88863	5.63337e-12	5.35983e-11
AC005696.3	ENSG00000272911	lncRNA	1.27147	-0.315756	0.136216	-2.31805	0.0204464	0.0423954
AC018635.2	ENSG00000272915	lncRNA	0.441945	-0.661376	0.22489	-2.94088	0.00327278	0.00828798
AL391121.1	ENSG00000272933	lncRNA	61.573	-0.435332	0.08412	-5.17513	2.27749e-07	1.16774e-06
AP001412.1	ENSG00000272948	lncRNA	6.84282	-0.221653	0.0901409	-2.45896	0.0139339	0.0302797
AC092171.4	ENSG00000272953	lncRNA	16.6127	-0.334312	0.0934238	-3.57844	0.000345648	0.0010616
MYHAS	ENSG00000272975	lncRNA	0.45252	0.64394	0.230604	2.79241	0.00523178	0.012645
LINC02012	ENSG00000272989	lncRNA	37.5811	-0.682121	0.0910005	-7.49579	6.58989e-14	7.93464e-13
FAM106A	ENSG00000273018	lncRNA	7.68901	0.674739	0.193594	3.48534	0.000491516	0.00146844
AC007684.2	ENSG00000273035	lncRNA	1.76012	-0.294759	0.1214	-2.42799	0.0151826	0.032648
AL359921.2	ENSG00000273058	lncRNA	21.2148	-0.350255	0.0609781	-5.74394	9.24997e-09	5.77146e-08
CDC37L1-DT	ENSG00000273061	lncRNA	12.6424	-0.182578	0.0738137	-2.47349	0.01338	0.0292089
AL355987.4	ENSG00000273066	lncRNA	181.938	-0.609264	0.102698	-5.93261	2.9816e-09	1.98681e-08
AC211433.2	ENSG00000273069	lncRNA	2.11675	-0.421984	0.107569	-3.92291	8.74846e-05	0.000299958
Z73429.1	ENSG00000273082	lncRNA	1.81379	-0.364635	0.132501	-2.75194	0.00592428	0.0141153
AC092171.5	ENSG00000273084	lncRNA	50.0605	-0.34442	0.070387	-4.89324	9.91901e-07	4.64016e-06
AC133528.1	ENSG00000273113	lncRNA	6.73363	-0.371378	0.10867	-3.41749	0.000632004	0.001849
AC144652.1	ENSG00000273117	lncRNA	58.1315	-0.208954	0.0667592	-3.12997	0.00174825	0.00468628
AC020634.2	ENSG00000273123	lncRNA	0.935451	0.572098	0.164431	3.47927	0.000502782	0.00149917
LINC01990	ENSG00000273125	lncRNA	0.488805	0.631726	0.195471	3.23181	0.00123008	0.00340685
AL355312.3	ENSG00000273132	lncRNA	55.1694	-0.852054	0.127138	-6.70178	2.05895e-11	1.81824e-10
LINC02604	ENSG00000273142	lncRNA	268.236	-0.212636	0.0756015	-2.81258	0.00491454	0.0119652
AL355512.1	ENSG00000273143	lncRNA	1.00616	-0.765616	0.215772	-3.54827	0.000387769	0.00118044
BX537318.1	ENSG00000273145	lncRNA	70.8802	-0.324798	0.0562167	-5.7776	7.57741e-09	4.77857e-08
AL133215.2	ENSG00000273162	lncRNA	39.4488	-0.163079	0.0676762	-2.40969	0.0159659	0.0341008
AL008635.1	ENSG00000273176	lncRNA	2.31174	-0.489422	0.102238	-4.78707	1.69231e-06	7.65986e-06
AC093726.2	ENSG00000273183	lncRNA	8.1134	-0.260599	0.0700255	-3.72149	0.000198049	0.000636506
AL671710.1	ENSG00000273192	lncRNA	19.966	-0.4115	0.0652506	-6.30646	2.85491e-10	2.16677e-09
AP000692.2	ENSG00000273199	lncRNA	5.11456	-0.46126	0.0976188	-4.72512	2.29983e-06	1.02007e-05
AC006946.2	ENSG00000273203	lncRNA	2.42214	0.722173	0.188474	3.83169	0.000127266	0.000423728
AC000068.2	ENSG00000273212	lncRNA	6.91178	-0.423066	0.0849843	-4.97817	6.41872e-07	3.08772e-06
AC097724.1	ENSG00000273233	lncRNA	0.544978	-0.414258	0.168428	-2.45956	0.0139107	0.0302377
AC010997.5	ENSG00000273248	lncRNA	2.45513	-0.882305	0.141001	-6.25743	3.91367e-10	2.91649e-09
BX649632.1	ENSG00000273249	lncRNA	5.79143	-0.400423	0.100805	-3.97226	7.11954e-05	0.000247948
AL022328.4	ENSG00000273253	lncRNA	13.4981	-0.499812	0.0818365	-6.10745	1.01238e-09	7.13932e-09
AC097381.3	ENSG00000273267	lncRNA	1.84817	-0.376082	0.137077	-2.74359	0.00607716	0.0144417
AL121672.3	ENSG00000273289	lncRNA	2.16228	-0.32183	0.112857	-2.85165	0.00434924	0.0107083
AC093458.1	ENSG00000273293	lncRNA	1.25467	-0.831001	0.159697	-5.2036	1.95468e-07	1.01062e-06
AC009275.1	ENSG00000273297	lncRNA	16.6348	-0.324705	0.105275	-3.08434	0.00204005	0.00539454
AC018690.1	ENSG00000273306	lncRNA	16.7047	-0.151859	0.0558003	-2.72147	0.00649923	0.0153294
PAXIP1-AS1	ENSG00000273344	lncRNA	430.226	-0.198193	0.0537714	-3.68585	0.000227942	0.000723634
AL353801.3	ENSG00000273363	lncRNA	2.8934	-0.269765	0.102955	-2.62021	0.00878747	0.0200883
SFTPD-AS1	ENSG00000273372	lncRNA	0.383728	0.541547	0.203329	2.6634	0.0077355	0.0179442
AC005291.2	ENSG00000273388	lncRNA	1.57579	0.609701	0.18382	3.31684	0.000910426	0.00258463
AC083880.1	ENSG00000273391	lncRNA	14.2885	-0.458315	0.0794439	-5.76903	7.9728e-09	5.01386e-08
LINC02725	ENSG00000273415	lncRNA	1.29406	0.557102	0.20604	2.70385	0.00685405	0.0160948
AL732292.2	ENSG00000273416	lncRNA	4.05114	-0.495723	0.103592	-4.78536	1.70683e-06	7.71899e-06
AC004832.6	ENSG00000273428	lncRNA	1.96339	-0.474337	0.139811	-3.39271	0.000692059	0.00200978
AC004951.4	ENSG00000273432	lncRNA	6.0916	-0.214554	0.0861378	-2.49083	0.0127447	0.0279463
AC108673.3	ENSG00000273437	lncRNA	19.9107	-0.450382	0.0678351	-6.63937	3.15035e-11	2.71923e-10
AP000229.1	ENSG00000273492	lncRNA	3.64336	-0.413568	0.125106	-3.30573	0.000947306	0.00268196
AC131009.3	ENSG00000273568	lncRNA	33.2722	-0.560883	0.0719218	-7.79852	6.26379e-15	8.63536e-14
AC009093.5	ENSG00000273582	lncRNA	2.00416	-0.460728	0.173725	-2.65205	0.00800058	0.0184873
AL121832.2	ENSG00000273619	lncRNA	77.5504	-0.619129	0.0797526	-7.76312	8.2867e-15	1.12537e-13
SUGT1-DT	ENSG00000273723	lncRNA	43.2513	-0.270414	0.0823594	-3.28335	0.00102582	0.00288461
AC007686.3	ENSG00000273729	lncRNA	29.8116	-0.21687	0.062165	-3.48862	0.000485528	0.00145294
AL117379.1	ENSG00000273759	lncRNA	29.9985	-0.292481	0.0890785	-3.28341	0.0010256	0.00288419
AC024257.4	ENSG00000273765	lncRNA	2.44119	-0.262162	0.108994	-2.40529	0.0161595	0.0344906
AC083805.3	ENSG00000273805	lncRNA	1.34417	-0.712162	0.181595	-3.9217	8.79252e-05	0.000301272
AC005695.3	ENSG00000273816	lncRNA	0.632086	-0.384185	0.163894	-2.34411	0.0190724	0.039908
AC018755.4	ENSG00000273837	lncRNA	4.4296	0.662631	0.131006	5.05801	4.23654e-07	2.09222e-06
AC084757.4	ENSG00000273925	lncRNA	0.369905	-0.607495	0.201888	-3.00906	0.00262056	0.00677175
AL136038.7	ENSG00000274015	lncRNA	6.0048	-0.61559	0.0870967	-7.06789	1.57303e-12	1.58794e-11
AL360169.2	ENSG00000274023	lncRNA	0.341672	-0.498199	0.21832	-2.28196	0.0224917	0.0460989
FAM27E3	ENSG00000274026	lncRNA	11.132	-0.339198	0.0864755	-3.92247	8.76455e-05	0.000300448
AC005089.1	ENSG00000274080	lncRNA	27.3318	-0.282973	0.111057	-2.54799	0.0108344	0.0241739
AC020910.5	ENSG00000274104	lncRNA	39.155	-0.357554	0.0651784	-5.48578	4.11648e-08	2.35054e-07
AC090164.2	ENSG00000274139	lncRNA	4.70804	-0.676707	0.179522	-3.7695	0.000163576	0.000534017
AL133243.1	ENSG00000274159	lncRNA	0.726021	-0.493937	0.148287	-3.33095	0.000865489	0.00246953
AC026333.4	ENSG00000274191	lncRNA	8.27105	-0.382595	0.0884128	-4.32737	1.50899e-05	5.89248e-05
AC015912.3	ENSG00000274213	lncRNA	36.1214	-0.662429	0.0855914	-7.73944	9.98583e-15	1.34041e-13
AP001065.3	ENSG00000274225	lncRNA	6.75242	-0.417018	0.111195	-3.75033	0.000176601	0.000573065
AP003419.2	ENSG00000274251	lncRNA	2.54184	-0.278688	0.10061	-2.76999	0.00560581	0.0134428
AC138649.1	ENSG00000274253	lncRNA	3.64901	0.528354	0.213989	2.46907	0.0135466	0.0295388
AL137060.3	ENSG00000274270	lncRNA	14.2262	-0.34328	0.078363	-4.38064	1.18332e-05	4.70877e-05
AC069281.2	ENSG00000274272	lncRNA	166.942	-0.576875	0.0628721	-9.17537	4.50046e-20	1.17439e-18
AC015660.3	ENSG00000274294	lncRNA	1.15409	-0.570471	0.152402	-3.74319	0.000181695	0.00058785
CU633967.1	ENSG00000274333	lncRNA	1.76803	0.517727	0.153114	3.38131	0.00072141	0.00208709
AC087742.1	ENSG00000274363	lncRNA	2.28159	-0.384953	0.122747	-3.13616	0.00171177	0.00459776
LINC02804	ENSG00000274372	lncRNA	2.99081	-0.483227	0.127013	-3.80456	0.000142056	0.000468727
AC148476.1	ENSG00000274373	lncRNA	12.1545	-0.678834	0.0937517	-7.24076	4.46187e-13	4.82799e-12
AL162390.1	ENSG00000274421	lncRNA	0.736459	-0.885439	0.204633	-4.32697	1.51176e-05	5.90087e-05
AC145423.2	ENSG00000274427	lncRNA	4.22826	-0.301673	0.100175	-3.01147	0.00259989	0.00672154
AC007336.2	ENSG00000274508	lncRNA	0.917851	0.593933	0.209989	2.8284	0.0046782	0.0114372
AC025031.3	ENSG00000274591	lncRNA	0.634992	-0.762798	0.178203	-4.28051	1.86466e-05	7.17721e-05
PCCA-DT	ENSG00000274605	lncRNA	291.567	-0.315657	0.0626076	-5.04182	4.61116e-07	2.26436e-06
AC073052.1	ENSG00000274629	lncRNA	1.9365	-0.535159	0.124309	-4.30507	1.66934e-05	6.473e-05
AC040169.3	ENSG00000274677	lncRNA	7.07344	-0.450962	0.078242	-5.76369	8.22961e-09	5.16686e-08
AC106886.3	ENSG00000274678	lncRNA	3.68814	-0.370786	0.113267	-3.27355	0.00106205	0.00297836
AC099521.2	ENSG00000274698	lncRNA	1.75042	0.567828	0.16237	3.49711	0.000470321	0.00141041
AC012653.2	ENSG00000274719	lncRNA	1.14461	0.954654	0.341407	2.79624	0.00517017	0.0125142
AC120498.9	ENSG00000274751	lncRNA	5.71501	-0.242865	0.100134	-2.4254	0.0152915	0.0328453
AC025166.1	ENSG00000274798	lncRNA	1.04101	-0.397524	0.150698	-2.63788	0.00834267	0.0191874
AL023803.2	ENSG00000274825	lncRNA	16.7329	-0.177079	0.0762502	-2.32234	0.0202144	0.0419738
AC068473.5	ENSG00000274828	lncRNA	74.4155	-0.146937	0.0575403	-2.55364	0.0106605	0.0238341
AC110285.5	ENSG00000274833	lncRNA	0.622041	-0.599584	0.184495	-3.24986	0.00115462	0.00321602
AC023043.4	ENSG00000274849	lncRNA	13.546	-0.261282	0.0786685	-3.32131	0.000895962	0.00254736
AC131238.1	ENSG00000274859	lncRNA	0.894956	-0.425582	0.15904	-2.67594	0.00745191	0.0173516
AC116447.1	ENSG00000274918	lncRNA	2.32827	-0.252264	0.101183	-2.49315	0.0126615	0.0277847
AL139384.1	ENSG00000274922	lncRNA	67.9463	-0.217803	0.0966804	-2.25282	0.0242706	0.049259
AL157813.1	ENSG00000274929	lncRNA	5.41829	-0.334412	0.0975135	-3.42939	0.00060494	0.00177471
AC087588.2	ENSG00000274976	lncRNA	11.4419	-0.321862	0.0949225	-3.39078	0.000696937	0.00202348
AC254629.1	ENSG00000274993	lncRNA	361.092	-0.400409	0.100138	-3.99857	6.37254e-05	0.000223953
AC020663.3	ENSG00000275056	lncRNA	5.4913	-0.297534	0.0937631	-3.17326	0.00150739	0.00409858
AC022098.4	ENSG00000275091	lncRNA	1.98751	-0.444752	0.136162	-3.26636	0.00108941	0.00304949
AL133492.1	ENSG00000275139	lncRNA	0.514017	-0.80006	0.258487	-3.09517	0.00196701	0.00522019
AL161421.1	ENSG00000275202	lncRNA	68.5729	-0.132292	0.057587	-2.29725	0.0216045	0.0445071
AC245884.11	ENSG00000275210	lncRNA	1.13055	0.510223	0.162701	3.13596	0.00171295	0.00460025
LINC02826	ENSG00000275212	lncRNA	9.81268	-1.24615	0.242965	-5.12895	2.91358e-07	1.4743e-06
AC010503.5	ENSG00000275234	lncRNA	493.371	-0.203438	0.053114	-3.83021	0.000128032	0.000426056
AL138781.1	ENSG00000275329	lncRNA	2.68572	-0.298048	0.123809	-2.40732	0.0160701	0.0343093
AC092111.1	ENSG00000275367	lncRNA	4.65616	0.640596	0.120483	5.31688	1.0556e-07	5.69419e-07
AC012645.4	ENSG00000275371	lncRNA	9.91085	-0.449686	0.102508	-4.38685	1.15004e-05	4.58061e-05
AC002553.2	ENSG00000275413	lncRNA	9.00537	-0.201784	0.0776617	-2.59824	0.00937039	0.0212594
AL121832.3	ENSG00000275437	lncRNA	94.7769	-0.268108	0.0817123	-3.28113	0.00103393	0.00290613
AL031008.1	ENSG00000275438	lncRNA	0.828825	-0.519095	0.191163	-2.71546	0.00661843	0.0155817
AC020765.2	ENSG00000275441	lncRNA	13.319	-0.490927	0.0904677	-5.42654	5.74571e-08	3.21741e-07
PTGER4P2-CDK2AP2P2	ENSG00000275450	lncRNA	0.909226	0.544846	0.170399	3.19747	0.00138641	0.00379583
AL117332.1	ENSG00000275457	lncRNA	28.2065	-0.360911	0.0752941	-4.79335	1.64018e-06	7.43891e-06
AC009318.4	ENSG00000275476	lncRNA	4.65887	-0.315353	0.139222	-2.2651	0.0235064	0.0478909
AC087741.2	ENSG00000275479	lncRNA	6.42754	-0.228911	0.0853475	-2.68211	0.00731597	0.0170643
AP003419.3	ENSG00000275484	lncRNA	9.0217	-0.362299	0.0840331	-4.31138	1.62238e-05	6.30114e-05
AL512652.1	ENSG00000275485	lncRNA	4.70147	-0.26683	0.103176	-2.58616	0.00970525	0.021928
LINC01730	ENSG00000275491	lncRNA	12.8264	-0.376849	0.116292	-3.24055	0.001193	0.00331247
AC133552.5	ENSG00000275494	lncRNA	22.8618	-0.54447	0.0845357	-6.44071	1.18918e-10	9.51066e-10
CU633906.1	ENSG00000275496	lncRNA	0.868882	0.60218	0.172683	3.48719	0.000488123	0.00145944
AC100791.3	ENSG00000275516	lncRNA	0.747289	-0.387477	0.166019	-2.33393	0.0195994	0.0408387
STPG3-AS1	ENSG00000275549	lncRNA	14.3669	-0.302827	0.120001	-2.52353	0.0116185	0.0257232
AL049539.1	ENSG00000275576	lncRNA	4.67052	-0.435424	0.112719	-3.86293	0.000112037	0.000376333
AC022306.2	ENSG00000275580	lncRNA	22.743	-0.187367	0.0703864	-2.66197	0.00776843	0.0180118
AC004816.2	ENSG00000275630	lncRNA	2.46997	-0.625204	0.127984	-4.885	1.03428e-06	4.83072e-06
AC008622.2	ENSG00000275719	lncRNA	22.063	-0.217099	0.0778828	-2.7875	0.00531159	0.0128144
AC091982.3	ENSG00000275765	lncRNA	51.6108	-0.165728	0.0679539	-2.43883	0.0147349	0.0317961
AC145285.6	ENSG00000275807	lncRNA	28.5116	-0.39836	0.087369	-4.55951	5.12733e-06	2.15968e-05
AL121829.2	ENSG00000275812	lncRNA	6.44668	-0.56116	0.122763	-4.57109	4.85204e-06	2.05096e-05
LINC01742	ENSG00000275852	lncRNA	0.400074	-0.765498	0.274288	-2.79085	0.00525693	0.0126985
AL139385.1	ENSG00000275880	lncRNA	16.6911	-0.21291	0.0830239	-2.56444	0.0103342	0.0231901
AC132872.3	ENSG00000275888	lncRNA	36.6001	-0.5265	0.0822232	-6.4033	1.52056e-10	1.20003e-09
AC009152.1	ENSG00000275927	lncRNA	0.852493	-0.482966	0.167783	-2.87852	0.00399545	0.00991509
AC004263.1	ENSG00000275936	lncRNA	2.5306	-0.458395	0.116231	-3.94384	8.01876e-05	0.000276719
AL355001.2	ENSG00000275964	lncRNA	110.507	-0.325072	0.0731212	-4.44567	8.76192e-06	3.56188e-05
FUT8-AS1	ENSG00000276116	lncRNA	19.8952	-0.196466	0.0834209	-2.35511	0.018517	0.0388799
AC084824.5	ENSG00000276148	lncRNA	12.5956	-0.224131	0.0652511	-3.4349	0.000592774	0.00174236
AC069234.4	ENSG00000276188	lncRNA	7.74723	-0.398817	0.0936998	-4.25633	2.07813e-05	7.9413e-05
AL118522.1	ENSG00000276223	lncRNA	2.92953	-0.511222	0.165029	-3.09777	0.00194985	0.00517861
AC127024.6	ENSG00000276250	lncRNA	4.55104	-0.301872	0.0820669	-3.67836	0.000234737	0.000742676
AC105429.1	ENSG00000276337	lncRNA	21.8796	-0.357355	0.0891598	-4.00803	6.12278e-05	0.000215771
AC016876.4	ENSG00000276384	lncRNA	2.72552	-0.473474	0.109909	-4.30786	1.64843e-05	6.39516e-05
AC092111.2	ENSG00000276417	lncRNA	0.449827	0.570607	0.195114	2.92449	0.00345025	0.00869076
AL136301.1	ENSG00000276436	lncRNA	0.523499	-0.693174	0.193589	-3.58065	0.000342745	0.00105328
AP000892.3	ENSG00000276505	lncRNA	2.71098	-0.319325	0.11743	-2.71927	0.00654265	0.0154252
AP001505.1	ENSG00000276529	lncRNA	74.7349	-0.267691	0.070725	-3.78496	0.000153736	0.000503869
AC018926.2	ENSG00000276533	lncRNA	6.4376	-0.207255	0.0916537	-2.26128	0.023742	0.0483168
AC010327.6	ENSG00000276570	lncRNA	31.6036	-0.153247	0.0639671	-2.39572	0.0165877	0.035302
AJ011931.1	ENSG00000276633	lncRNA	1.11311	-0.423304	0.18247	-2.31985	0.0203487	0.0422136
AL136295.6	ENSG00000276698	lncRNA	18.6993	-0.267306	0.0743719	-3.59418	0.00032542	0.00100318
AC005840.4	ENSG00000276718	lncRNA	21.7459	-0.32139	0.0698046	-4.60413	4.14188e-06	1.76916e-05
AC142472.1	ENSG00000276728	lncRNA	26.6001	-0.183096	0.0629821	-2.90711	0.00364781	0.00913182
AC105137.2	ENSG00000276744	lncRNA	8.14614	-0.300807	0.0780565	-3.8537	0.000116345	0.000389573
AC023510.2	ENSG00000276842	lncRNA	1.51076	0.970528	0.169349	5.73095	9.9869e-09	6.20392e-08
AC245041.2	ENSG00000276850	lncRNA	5.19603	0.569988	0.199953	2.8506	0.00436365	0.010741
AC002401.4	ENSG00000276851	lncRNA	1.65019	-0.677691	0.198598	-3.41238	0.000643975	0.00188129
AC074050.4	ENSG00000276867	lncRNA	2.59349	-0.318814	0.11031	-2.89017	0.00385029	0.0095841
AC148477.4	ENSG00000277011	lncRNA	8.12318	-0.943081	0.204095	-4.62079	3.82286e-06	1.64115e-05
AC092757.3	ENSG00000277144	lncRNA	3.88552	-0.277586	0.104313	-2.66108	0.00778902	0.0180552
AC012676.3	ENSG00000277170	lncRNA	5.32728	-0.238287	0.0938578	-2.53881	0.011123	0.0247368
AC004241.4	ENSG00000277173	lncRNA	3.22679	-0.459199	0.113753	-4.03681	5.41821e-05	0.000192805
AC131212.1	ENSG00000277186	lncRNA	2.74606	-0.625976	0.126735	-4.93927	7.84168e-07	3.732e-06
AC090164.3	ENSG00000277210	lncRNA	2.25683	-0.452263	0.127383	-3.55043	0.000384602	0.00117127
AL035420.3	ENSG00000277235	lncRNA	2.53076	-0.445017	0.126593	-3.51535	0.000439183	0.00132347
AL157762.1	ENSG00000277246	lncRNA	1.95414	-0.316265	0.12348	-2.56127	0.0104289	0.0233684
AC083809.1	ENSG00000277247	lncRNA	26.3064	-0.717714	0.159084	-4.51154	6.43595e-06	2.66971e-05
AL034550.2	ENSG00000277301	lncRNA	0.885899	0.547606	0.174269	3.1423	0.00167627	0.00451155
AC010331.1	ENSG00000277383	lncRNA	9.03499	-0.701976	0.0891424	-7.87477	3.41382e-15	4.86421e-14
AC012676.4	ENSG00000277440	lncRNA	3.62486	-0.436286	0.104769	-4.16426	3.12364e-05	0.000116071
AP001527.2	ENSG00000277459	lncRNA	10.469	-0.510681	0.0937491	-5.44732	5.11354e-08	2.88497e-07
AC005332.5	ENSG00000277476	lncRNA	83.6533	-0.199002	0.0664393	-2.99525	0.00274224	0.00705519
AL357033.4	ENSG00000277496	lncRNA	174.639	-0.224059	0.0795239	-2.81751	0.0048398	0.0118021
AL356752.1	ENSG00000277545	lncRNA	0.471832	-0.477101	0.194595	-2.45177	0.0142156	0.0308112
AL109923.1	ENSG00000277558	lncRNA	0.698027	-0.448095	0.172372	-2.59959	0.00933358	0.0211872
AC089999.2	ENSG00000277566	lncRNA	6.02095	-0.942592	0.103279	-9.12662	7.06722e-20	1.80235e-18
AL023803.3	ENSG00000277581	lncRNA	2.89539	-0.568109	0.12996	-4.37141	1.23444e-05	4.89335e-05
AC130343.2	ENSG00000277597	lncRNA	1.97559	-0.479426	0.123643	-3.87751	0.000105531	0.000356263
AC005363.2	ENSG00000277602	lncRNA	1.42653	-0.427504	0.144695	-2.95451	0.00313163	0.00796535
AL354696.1	ENSG00000277662	lncRNA	18.9131	-0.205413	0.0716612	-2.86645	0.00415102	0.0102632
AC079174.2	ENSG00000277715	lncRNA	26.6851	-0.222217	0.0758826	-2.92843	0.00340677	0.00859205
AC011462.4	ENSG00000277744	lncRNA	12.24	-0.30831	0.0811052	-3.80136	0.000143903	0.000474329
AC131159.2	ENSG00000277873	lncRNA	4.33844	-0.194541	0.0809892	-2.40207	0.0163028	0.0347576
AC092376.2	ENSG00000277954	lncRNA	8.07101	0.706771	0.0996913	7.08959	1.34506e-12	1.36865e-11
AL162274.2	ENSG00000277959	lncRNA	8.06778	-0.284785	0.0702097	-4.05621	4.98757e-05	0.00017868
AC006449.6	ENSG00000277969	lncRNA	121.954	-0.281314	0.0552142	-5.09496	3.48815e-07	1.74403e-06
AC139100.2	ENSG00000278000	lncRNA	10.7869	-0.374487	0.0946889	-3.95492	7.65595e-05	0.00026506
AC114341.1	ENSG00000278075	lncRNA	3.3442	-0.558568	0.0948041	-5.89182	3.81975e-09	2.50945e-08
AC027575.2	ENSG00000278107	lncRNA	8.91361	-0.229739	0.0803603	-2.85886	0.00425166	0.0104905
AL121782.1	ENSG00000278153	lncRNA	2.00928	-0.264526	0.112623	-2.34877	0.0188356	0.0394623
AL354811.1	ENSG00000278177	lncRNA	1.27896	0.907588	0.15865	5.72071	1.06083e-08	6.56219e-08
LINC01971	ENSG00000278200	lncRNA	1.80844	-0.758108	0.210025	-3.60962	0.000306649	0.000949838
AL359513.1	ENSG00000278238	lncRNA	21.2534	-0.445605	0.0874986	-5.09271	3.52985e-07	1.76327e-06
AL161772.1	ENSG00000278291	lncRNA	151.946	-0.414098	0.0789107	-5.24768	1.54027e-07	8.08165e-07
AC005911.1	ENSG00000278356	lncRNA	7.22052	-0.317384	0.0936133	-3.39037	0.000697971	0.00202602
AL356652.1	ENSG00000278367	lncRNA	3.69179	-0.635552	0.127523	-4.98382	6.23418e-07	3.00727e-06
AP004609.3	ENSG00000278376	lncRNA	26.7348	-0.165875	0.0712174	-2.32914	0.0198516	0.0413011
AL359880.1	ENSG00000278462	lncRNA	1.05039	-0.498899	0.161515	-3.08888	0.00200913	0.00532126
AC010998.3	ENSG00000278484	lncRNA	6.06849	-0.6373	0.238395	-2.67329	0.00751114	0.0174768
AL161645.1	ENSG00000278518	lncRNA	1.04467	0.665755	0.207886	3.20251	0.00136238	0.00373725
AC003101.2	ENSG00000278546	lncRNA	2.71944	-0.925126	0.12743	-7.2599	3.87376e-13	4.2251e-12
ZNF426-DT	ENSG00000278611	lncRNA	14.9541	-0.321855	0.0992382	-3.24326	0.00118172	0.00328384
AC133540.1	ENSG00000278716	lncRNA	6.61448	-0.511372	0.176146	-2.90312	0.00369466	0.00923581
AC087239.1	ENSG00000278743	lncRNA	3.94579	-0.373703	0.103677	-3.60448	0.000312779	0.000967334
AL136295.7	ENSG00000278784	lncRNA	61.9305	-0.15341	0.0508201	-3.01869	0.00253869	0.00657797
HEIH	ENSG00000278970	lncRNA	585.575	-0.352701	0.0422911	-8.33982	7.44012e-17	1.2958e-15
FP671120.4	ENSG00000278996	lncRNA	17.6473	-0.268018	0.0768037	-3.48965	0.000483647	0.00144765
AL022322.2	ENSG00000279080	lncRNA	6.93353	-0.209101	0.0886612	-2.35842	0.0183528	0.0385818
LINC01727	ENSG00000279082	lncRNA	0.702024	0.616256	0.205817	2.99419	0.00275178	0.00707735
AL022323.2	ENSG00000279085	lncRNA	1.58024	-0.550757	0.144331	-3.81594	0.000135664	0.000449341
AL022323.3	ENSG00000279110	lncRNA	11.1418	-0.360484	0.0949963	-3.79472	0.00014781	0.00048591
LINC01451	ENSG00000279141	lncRNA	30.437	-0.429664	0.144476	-2.97395	0.00293992	0.00751926
CR559946.2	ENSG00000279182	lncRNA	2.2031	-0.520452	0.130266	-3.99531	6.46091e-05	0.000226683
CR392039.4	ENSG00000279501	lncRNA	0.683102	1.12429	0.465415	2.41568	0.015706	0.0336184
AL022323.4	ENSG00000279548	lncRNA	0.853082	-0.572848	0.179405	-3.19305	0.00140777	0.00384907
AC025280.2	ENSG00000279622	lncRNA	1.35722	0.504078	0.149775	3.36557	0.000763868	0.00220059
AL022311.1	ENSG00000279738	lncRNA	87.494	-0.27376	0.0518979	-5.27497	1.32781e-07	7.05012e-07
AC022784.6	ENSG00000279949	lncRNA	2.97058	-0.334735	0.138857	-2.41065	0.015924	0.0340259
PLAC4	ENSG00000280109	lncRNA	60.0911	-0.391919	0.139468	-2.81011	0.00495249	0.0120477
AL008636.1	ENSG00000280224	lncRNA	1.4492	-1.4778	0.254553	-5.80547	6.41873e-09	4.08697e-08
AC079298.3	ENSG00000280241	lncRNA	1.6643	0.918804	0.207308	4.43208	9.33302e-06	3.77358e-05
FP325332.1	ENSG00000280384	lncRNA	7.13046	-0.252737	0.106582	-2.37128	0.0177264	0.0374398
AL356481.2	ENSG00000280474	lncRNA	0.677204	-0.503863	0.17871	-2.81945	0.00481064	0.0117399
ASAP1-IT2	ENSG00000280543	lncRNA	2.20217	-0.543925	0.139354	-3.90319	9.49331e-05	0.000322997
LINC01348	ENSG00000280587	lncRNA	42.1739	-0.506763	0.122457	-4.13831	3.49877e-05	0.000128909
AJ239328.1	ENSG00000280604	lncRNA	8.14828	-0.32265	0.14207	-2.27107	0.0231428	0.0472485
SH3PXD2A-AS1	ENSG00000280693	lncRNA	160.352	-0.437012	0.11326	-3.85848	0.000114096	0.000382644
AL356481.3	ENSG00000280758	lncRNA	8.93422	-0.262875	0.0831522	-3.16137	0.0015703	0.00424939
AL732314.4	ENSG00000280767	lncRNA	2.35212	-0.645707	0.123495	-5.2286	1.708e-07	8.914e-07
FP671120.6	ENSG00000280800	lncRNA	1.16415	-1.69128	0.343047	-4.93018	8.21553e-07	3.8957e-06
LINC00628	ENSG00000280924	lncRNA	11.955	-0.455732	0.0729129	-6.25036	4.09513e-10	3.04163e-09
CTBP1-AS	ENSG00000280927	lncRNA	55.9505	-0.293963	0.0760123	-3.8673	0.000110045	0.000370196
CCAT2	ENSG00000280997	lncRNA	3.75674	0.637073	0.146159	4.35877	1.30796e-05	5.16176e-05
AC024941.2	ENSG00000281333	lncRNA	6.91793	-0.40211	0.104629	-3.84321	0.000121434	0.000405511
FP671120.7	ENSG00000281383	lncRNA	14.0232	-0.904848	0.122347	-7.39572	1.40643e-13	1.6283e-12
LINC00506	ENSG00000281392	lncRNA	2.94029	0.63796	0.131257	4.8604	1.17147e-06	5.42772e-06
LINC01176	ENSG00000281404	lncRNA	38.9761	-0.27889	0.0831256	-3.35505	0.000793513	0.00227981
AC254562.3	ENSG00000281538	lncRNA	8.68416	-0.266627	0.0799381	-3.33542	0.000851717	0.00243314
LINC00895	ENSG00000281548	lncRNA	0.258723	-0.769188	0.325751	-2.36128	0.0182121	0.0383239
DBET	ENSG00000281591	lncRNA	7.65056	-0.727642	0.201463	-3.61178	0.000304101	0.000942556
AL732314.6	ENSG00000281849	lncRNA	5.66512	-0.227464	0.0846739	-2.68635	0.00722376	0.0168687
LINC00891	ENSG00000281852	lncRNA	0.931853	0.687932	0.177279	3.88051	0.000104238	0.000352304
LINC01144	ENSG00000281912	lncRNA	23.5431	-0.182501	0.07048	-2.58941	0.00961412	0.0217478
