# Supplementary material for: Comprehensive analysis of ceRNA network of ERCC4 in colorectal cancer
Source: PeerJ. 2021 Dec 14;9:e12647. doi: 10.7717/peerj.12647 (PMC8679902; doi:10.7717/peerj.12647)
Supplement: Supplemental Information 3 [file peerj-09-12647-s003.xls]

## Sheet: ERCC4
the relationship between ERCC4 and drug sensitivity
Compound	RNAtype	RNAmolecule	Omics	Source	T.stat	T.fdr	Chi.stat	Chi.fdr	Pearson.stat	Pearson.fdr	Spearman.stat	Spearman.fdr	Details
(5Z)-7-Oxozeaenol	mRNA	ERCC4	Methylation	GDSC	-	-	-	-	0.117763	0.00277727	0.103913	0.00937596
.alpha.-sarcin	mRNA	ERCC4	Methylation	CellMiner	-	-	-	-	-	-	-0.350864	0.0312882
1-phenyl-5-(4-(trifluoromethyl)phenyl)-1h-imidazole	mRNA	ERCC4	Methylation	CellMiner	-	-	-	-	0.396342	0.0254767	-	-
11-methoxycarbonylmethylen-11h-indolo[1,2-a]indazole	mRNA	ERCC4	Methylation	CellMiner	-	-	-	-	0.383458	0.028716	-	-
17-AAG	mRNA	ERCC4	Mutation	CCLE	-4.40579	0.000221753	-	-	-	-	-	-
2,3,6-tribromo-7-chloro-3,7-dimethyl-1-octene	mRNA	ERCC4	Methylation	CellMiner	-	-	-	-	0.391666	0.0253124	-	-
5-Fluorouracil	mRNA	ERCC4	CNV	GDSC	-	-	-	-	0.114865	0.000895146	0.117251	0.000779914
5-Fluorouracil	mRNA	ERCC4	Expression	GDSC	-	-	-	-	-0.0931921	0.00847821	-0.0905723	0.00979069
5-Fluorouracil	mRNA	ERCC4	Methylation	GDSC	-	-	-	-	-0.154907	1.66533e-05	-0.153083	2.99869e-05
6-aminotoyocamycin	mRNA	ERCC4	Methylation	CellMiner	-	-	-	-	0.451826	0.0294218	0.413947	0.0360353
6-benzylthioinosine	mRNA	ERCC4	Methylation	CellMiner	-	-	-	-	0.338716	0.0354607	-	-
7-fluoro-2-benzoyl-3-trifluoromethylquioxaline 1,4-dioxide	mRNA	ERCC4	Expression	CellMiner	-	-	-	-	-0.378705	0.0383786	-0.39487	0.0285726
;(Z)-5-Chloro-2-(1-methyl-5-nitroimidazole-2-ylmethylene...	mRNA	ERCC4	Methylation	CellMiner	-	-	-	-	0.437682	0.0137289	0.43373	0.0236914
;(Z)-6-Chloro-2-(1-methyl-4-nitroimidazole-5-ylmethylene...	mRNA	ERCC4	Methylation	CellMiner	-	-	-	-	0.372364	0.0449084	-	-
Afatinib	mRNA	ERCC4	Expression	GDSC	-	-	-	-	0.104483	0.00546342	0.109653	0.00350928
AICA Ribonucleotide	mRNA	ERCC4	CNV	GDSC	-	-	-	-	0.069208	0.0480801	-	-
AICA Ribonucleotide	mRNA	ERCC4	Expression	GDSC	-	-	-	-	-0.0944298	0.00925963	-0.0873858	0.0159952
AICA Ribonucleotide	mRNA	ERCC4	Methylation	GDSC	-	-	-	-	-0.165478	4.24293e-06	-0.159143	1.41988e-05
AKT inhibitor VIII	mRNA	ERCC4	Expression	GDSC	-	-	-	-	-0.148721	2.30587e-05	-0.13478	0.000127627
AKT inhibitor VIII	mRNA	ERCC4	Methylation	GDSC	-	-	-	-	-0.171697	1.89652e-06	-0.176658	1.60911e-06
Alectinib	mRNA	ERCC4	Expression	GDSC	-	-	-	-	-0.0979683	0.00712769	-0.116486	0.000871326
Alectinib	mRNA	ERCC4	Methylation	GDSC	-	-	-	-	-0.138374	0.000142366	-0.152004	3.36675e-05
Amuvatinib	mRNA	ERCC4	Expression	GDSC	-	-	-	-	-0.0762907	0.0359915	-0.105244	0.00234819
Amuvatinib	mRNA	ERCC4	Methylation	GDSC	-	-	-	-	-0.139021	0.000343971	-0.179538	9.99897e-07
AR-42	mRNA	ERCC4	CNV	GDSC	-	-	-	-	-	-	0.0802429	0.0270509
AR-42	mRNA	ERCC4	Expression	GDSC	-	-	-	-	-0.12922	0.000249816	-0.134026	0.000109118
AR-42	mRNA	ERCC4	Methylation	GDSC	-	-	-	-	-0.113194	0.00233127	-0.132986	0.000294404
AS605240	mRNA	ERCC4	Methylation	GDSC	-	-	-	-	-0.126389	0.00108225	-0.135867	0.000524938
AT-7519	mRNA	ERCC4	CNV	GDSC	-	-	-	-	0.0823562	0.0492743	0.0961505	0.0145503
AT-7519	mRNA	ERCC4	Expression	GDSC	-	-	-	-	-0.13627	8.82894e-05	-0.122967	0.000404109
AT-7519	mRNA	ERCC4	Methylation	GDSC	-	-	-	-	-0.215621	5.9982e-10	-0.211014	2.888e-09
Avagacestat	mRNA	ERCC4	Expression	GDSC	-	-	-	-	-0.115887	0.00214291	-0.0966828	0.0126207
Axitinib	mRNA	ERCC4	CNV	GDSC	-	-	-	-	0.0829735	0.0188389	0.0957823	0.00607785
Axitinib	mRNA	ERCC4	Expression	GDSC	-	-	-	-	-0.151195	2.7364e-05	-0.177482	8.86331e-07
AZD7762	mRNA	ERCC4	CNV	GDSC	-	-	-	-	0.0991608	0.0049465	0.0832291	0.0198656
AZD7762	mRNA	ERCC4	Expression	GDSC	-	-	-	-	-0.0780096	0.0397644	-0.10557	0.0040323
AZD8055	mRNA	ERCC4	CNV	GDSC	-	-	-	-	0.0910025	0.00951302	0.0988645	0.00571165
AZD8055	mRNA	ERCC4	Expression	GDSC	-	-	-	-	-0.173902	8.39921e-07	-0.149515	3.19619e-05
AZD8055	mRNA	ERCC4	Methylation	GDSC	-	-	-	-	-0.0805851	0.035535	-	-
basic yellow k	mRNA	ERCC4	Methylation	CellMiner	-	-	-	-	-	-	0.33683	0.039461
BAY-61-3606	mRNA	ERCC4	CNV	GDSC	-	-	-	-	0.111129	0.0016773	0.120944	0.000726085
BAY-61-3606	mRNA	ERCC4	Expression	GDSC	-	-	-	-	-0.0935497	0.0117596	-0.100275	0.00661834
Belinostat	mRNA	ERCC4	CNV	GDSC	-	-	-	-	-	-	0.0747638	0.0465218
Belinostat	mRNA	ERCC4	Expression	GDSC	-	-	-	-	-0.134966	0.000164623	-0.130855	0.0001895
Belinostat	mRNA	ERCC4	Methylation	GDSC	-	-	-	-	-0.123994	0.000937611	-0.14384	9.58275e-05
Bicalutamide	mRNA	ERCC4	Expression	GDSC	-	-	-	-	-0.185419	3.47791e-07	-0.189752	1.07817e-07
BIX02189	mRNA	ERCC4	CNV	GDSC	-	-	-	-	0.104934	0.00210268	0.110705	0.00104081
BIX02189	mRNA	ERCC4	Expression	GDSC	-	-	-	-	-0.17217	4.15158e-07	-0.168412	8.44429e-07
BIX02189	mRNA	ERCC4	Methylation	GDSC	-	-	-	-	-0.188285	4.88692e-08	-0.178678	3.6395e-07
Bleomycin	mRNA	ERCC4	CNV	GDSC	-	-	-	-	0.0916612	0.0430117	0.0950131	0.0227908
Bleomycin (50 uM)	mRNA	ERCC4	CNV	GDSC	-	-	-	-	0.118556	0.00274584	0.0976893	0.0178943
Bleomycin (50 uM)	mRNA	ERCC4	Methylation	GDSC	-	-	-	-	0.199014	6.87664e-08	0.198351	5.97217e-08
BMS-345541	mRNA	ERCC4	CNV	GDSC	-	-	-	-	0.083906	0.0247372	0.106616	0.00268725
BMS-345541	mRNA	ERCC4	Expression	GDSC	-	-	-	-	-0.137002	6.87589e-05	-0.131661	0.000113374
BMS-345541	mRNA	ERCC4	Methylation	GDSC	-	-	-	-	-0.217419	3.71755e-10	-0.215607	8.58694e-10
Bryostatin 1	mRNA	ERCC4	Expression	GDSC	-	-	-	-	-	-	-0.0994814	0.040601
BX-912	mRNA	ERCC4	CNV	GDSC	-	-	-	-	0.125285	0.000563767	0.14041	7.86137e-05
BX-912	mRNA	ERCC4	Expression	GDSC	-	-	-	-	-0.165228	1.18998e-06	-0.152661	8.12314e-06
BX-912	mRNA	ERCC4	Methylation	GDSC	-	-	-	-	-0.204328	2.92935e-09	-0.195164	2.49276e-08
BX795	mRNA	ERCC4	CNV	GDSC	-	-	-	-	0.0864031	0.0291647	0.0904087	0.0258821
BX795	mRNA	ERCC4	Expression	GDSC	-	-	-	-	-0.124675	0.000852318	-0.124393	0.00095303
Cabozantinib	mRNA	ERCC4	CNV	GDSC	-	-	-	-	0.0785453	0.0288289	0.08168	0.0289864
Cabozantinib	mRNA	ERCC4	Expression	GDSC	-	-	-	-	-0.0916211	0.0159112	-0.103284	0.00689113
CAY10603	mRNA	ERCC4	CNV	GDSC	-	-	-	-	-	-	0.0977655	0.00580532
CAY10603	mRNA	ERCC4	Expression	GDSC	-	-	-	-	-0.142465	4.85344e-05	-0.154075	7.39906e-06
CAY10603	mRNA	ERCC4	Methylation	GDSC	-	-	-	-	-0.11493	0.00182985	-0.133285	0.000254231
CCT-018159	mRNA	ERCC4	Expression	GDSC	-	-	-	-	-0.117959	0.00363451	-0.11249	0.00652676
CCT007093	mRNA	ERCC4	Expression	GDSC	-	-	-	-	-0.100448	0.0146315	-0.115537	0.00346069
Cetuximab	mRNA	ERCC4	Expression	GDSC	-	-	-	-	0.0916456	0.0218068	-	-
CHIR-99021	mRNA	ERCC4	Expression	GDSC	-	-	-	-	-	-	-0.0841651	0.0373615
CHIR-99021	mRNA	ERCC4	Methylation	GDSC	-	-	-	-	0.108228	0.00563438	0.0964321	0.0159359
CI-1040	mRNA	ERCC4	Methylation	GDSC	-	-	-	-	0.167774	9.23387e-06	0.17804	2.51883e-06
Cisplatin	mRNA	ERCC4	CNV	GDSC	-	-	-	-	0.0832157	0.0476312	0.0848102	0.0309172
CP466722	mRNA	ERCC4	CNV	GDSC	-	-	-	-	0.108537	0.00278438	0.1202	0.000825226
CP466722	mRNA	ERCC4	Expression	GDSC	-	-	-	-	-0.131495	0.00016215	-0.13165	0.00014858
CP466722	mRNA	ERCC4	Methylation	GDSC	-	-	-	-	-0.172489	9.21243e-07	-0.17714	6.46135e-07
CP724714	mRNA	ERCC4	Expression	GDSC	-	-	-	-	-0.0955343	0.0157438	-0.121993	0.00100421
CP724714	mRNA	ERCC4	Methylation	GDSC	-	-	-	-	-	-	-0.107504	0.00879868
CP724714	mRNA	ERCC4	Mutation	GDSC	-5.57444	0.0392925	-	-	-	-	-	-
CUDC-101	mRNA	ERCC4	CNV	GDSC	-	-	-	-	-	-	0.0941587	0.0141708
CUDC-101	mRNA	ERCC4	Expression	GDSC	-	-	-	-	-0.136854	0.000121707	-0.122047	0.00055363
CUDC-101	mRNA	ERCC4	Methylation	GDSC	-	-	-	-	-0.152728	2.69915e-05	-0.170946	2.71741e-06
CX-5461	mRNA	ERCC4	CNV	GDSC	-	-	-	-	0.129252	0.000223928	0.140681	5.58102e-05
CX-5461	mRNA	ERCC4	Expression	GDSC	-	-	-	-	-0.120115	0.000557983	-0.132097	0.000137979
CX-5461	mRNA	ERCC4	Methylation	GDSC	-	-	-	-	-0.180735	2.76282e-07	-0.176682	8.36053e-07
Cytarabine	mRNA	ERCC4	CNV	GDSC	-	-	-	-	0.103346	0.0096337	0.0961004	0.0137615
Dabrafenib	mRNA	ERCC4	CNV	GDSC	-	-	-	-	-	-	0.0883026	0.0196871
Dabrafenib	mRNA	ERCC4	Methylation	GDSC	-	-	-	-	0.0802271	0.0452468	-	-
Dacinostat	mRNA	ERCC4	Expression	GDSC	-	-	-	-	-	-	-0.0780694	0.0363283
Dacinostat	mRNA	ERCC4	Methylation	GDSC	-	-	-	-	-0.133712	0.000483093	-0.156078	5.29786e-05
Dactolisib	mRNA	ERCC4	Expression	GDSC	-	-	-	-	-0.127484	0.00103874	-0.125536	0.00155952
Daporinad	mRNA	ERCC4	CNV	GDSC	-	-	-	-	0.0755417	0.0252543	0.095474	0.00438386
Daporinad	mRNA	ERCC4	Expression	GDSC	-	-	-	-	-0.233967	4.00787e-12	-0.241085	6.11276e-13
Daporinad	mRNA	ERCC4	Methylation	GDSC	-	-	-	-	-0.137955	0.000142795	-0.149848	3.19843e-05
DMOG	mRNA	ERCC4	Expression	GDSC	-	-	-	-	-0.0856522	0.0356207	-	-
Docetaxel	mRNA	ERCC4	Methylation	GDSC	-	-	-	-	0.201768	2.81075e-08	0.210127	5.27425e-09
Doxorubicin	mRNA	ERCC4	CNV	GDSC	-	-	-	-	0.124622	0.0143092	0.144586	0.00343101
EHT-1864	mRNA	ERCC4	Expression	GDSC	-	-	-	-	-0.113154	0.00270563	-0.106899	0.00414709
ellipticine, 6-(3-aminopropyl)-, dihydrochloride	mRNA	ERCC4	Methylation	CellMiner	-	-	-	-	0.449154	0.0199368	-	-
Enzastaurin	mRNA	ERCC4	Methylation	GDSC	-	-	-	-	-0.0785035	0.0411836	-	-
Erlotinib	mRNA	ERCC4	Mutation	CCLE	6.5354	2.13002e-09	-	-	-	-	-	-
Etoposide	mRNA	ERCC4	CNV	GDSC	-	-	-	-	0.148005	0.00082526	0.163698	0.000252637
Etoposide	mRNA	ERCC4	Methylation	GDSC	-	-	-	-	-0.0963284	0.012567	-0.0962136	0.0138501
euchrysine	mRNA	ERCC4	Methylation	CellMiner	-	-	-	-	0.384011	0.0314454	-	-
Fedratinib	mRNA	ERCC4	CNV	GDSC	-	-	-	-	0.0764994	0.0353741	0.0797188	0.0272898
Fedratinib	mRNA	ERCC4	Expression	GDSC	-	-	-	-	-0.121166	0.000520537	-0.119992	0.000595145
Fedratinib	mRNA	ERCC4	Methylation	GDSC	-	-	-	-	-0.154937	1.06856e-05	-0.153133	1.6705e-05
Foretinib	mRNA	ERCC4	CNV	GDSC	-	-	-	-	0.111455	0.00128901	0.0920063	0.00994035
Foretinib	mRNA	ERCC4	Expression	GDSC	-	-	-	-	-0.0996961	0.00847404	-0.109685	0.0039171
Foretinib	mRNA	ERCC4	Methylation	GDSC	-	-	-	-	-0.07755	0.0499094	-	-
FR-180204	mRNA	ERCC4	CNV	GDSC	-	-	-	-	0.0830375	0.0275646	0.0855564	0.0270668
FR-180204	mRNA	ERCC4	Expression	GDSC	-	-	-	-	-0.0819508	0.0250137	-0.0876555	0.0152152
FR-180204	mRNA	ERCC4	Methylation	GDSC	-	-	-	-	-0.140816	0.00012684	-0.156863	2.94235e-05
Gemcitabine	mRNA	ERCC4	CNV	GDSC	-	-	-	-	0.109509	0.00846656	0.115818	0.00688732
Genentech Cpd 10	mRNA	ERCC4	CNV	GDSC	-	-	-	-	0.0812666	0.0244984	0.0992955	0.00509407
Genentech Cpd 10	mRNA	ERCC4	Expression	GDSC	-	-	-	-	-0.142237	4.47286e-05	-0.125949	0.000346724
Genentech Cpd 10	mRNA	ERCC4	Methylation	GDSC	-	-	-	-	-0.146693	4.23965e-05	-0.137485	0.000172322
GSK1070916	mRNA	ERCC4	CNV	GDSC	-	-	-	-	0.125813	0.000484823	0.144828	3.48081e-05
GSK1070916	mRNA	ERCC4	Expression	GDSC	-	-	-	-	-0.139004	5.08418e-05	-0.130947	0.000143315
GSK1070916	mRNA	ERCC4	Methylation	GDSC	-	-	-	-	-0.239854	2.35585e-12	-0.208619	2.92533e-09
GSK1904529A	mRNA	ERCC4	Expression	GDSC	-	-	-	-	-	-	-0.107783	0.0196016
GSK269962A	mRNA	ERCC4	Expression	GDSC	-	-	-	-	-0.145438	8.1082e-05	-0.141574	0.0001268
GSK429286A	mRNA	ERCC4	CNV	GDSC	-	-	-	-	0.0826178	0.0256638	0.092387	0.00808303
GSK429286A	mRNA	ERCC4	Expression	GDSC	-	-	-	-	-0.188052	2.94496e-08	-0.210595	3.90433e-10
GSK429286A	mRNA	ERCC4	Methylation	GDSC	-	-	-	-	-0.117344	0.00105224	-0.120093	0.000908938
GSK650394	mRNA	ERCC4	CNV	GDSC	-	-	-	-	0.103405	0.0241188	0.107947	0.0179493
GSK690693	mRNA	ERCC4	CNV	GDSC	-	-	-	-	-	-	0.0734854	0.0424776
GSK690693	mRNA	ERCC4	Expression	GDSC	-	-	-	-	-0.162929	1.9993e-06	-0.145236	2.70894e-05
GSK690693	mRNA	ERCC4	Methylation	GDSC	-	-	-	-	-0.263068	1.74327e-14	-0.2462	2.17585e-12
GW-2580	mRNA	ERCC4	CNV	GDSC	-	-	-	-	0.0997286	0.0138569	0.107693	0.0051243
GW-2580	mRNA	ERCC4	Expression	GDSC	-	-	-	-	-0.0889825	0.0152766	-0.113801	0.00132372
GW-2580	mRNA	ERCC4	Methylation	GDSC	-	-	-	-	-0.121671	0.00134181	-0.110039	0.00443742
I-BET-762	mRNA	ERCC4	CNV	GDSC	-	-	-	-	-	-	0.0701527	0.0497573
I-BET-762	mRNA	ERCC4	Expression	GDSC	-	-	-	-	-0.171006	4.13265e-07	-0.156287	4.26946e-06
I-BET-762	mRNA	ERCC4	Methylation	GDSC	-	-	-	-	-0.205065	2.71845e-09	-0.199109	1.47124e-08
ICL1100013	mRNA	ERCC4	Expression	GDSC	-	-	-	-	-0.100077	0.0127067	-0.0915584	0.0286957
Idelalisib	mRNA	ERCC4	CNV	GDSC	-	-	-	-	0.0816447	0.0279368	0.0879092	0.0138226
Idelalisib	mRNA	ERCC4	Expression	GDSC	-	-	-	-	-0.137972	7.34677e-05	-0.113737	0.00138389
Idelalisib	mRNA	ERCC4	Methylation	GDSC	-	-	-	-	-0.170433	1.16018e-06	-0.145826	5.68434e-05
IOX2	mRNA	ERCC4	Expression	GDSC	-	-	-	-	-0.124562	0.00226151	-0.154846	3.36339e-05
IPA-3	mRNA	ERCC4	CNV	GDSC	-	-	-	-	0.0863837	0.033116	0.0921156	0.0191481
IPA-3	mRNA	ERCC4	Expression	GDSC	-	-	-	-	-0.165775	2.55963e-06	-0.1601	7.12938e-06
IPA-3	mRNA	ERCC4	Methylation	GDSC	-	-	-	-	-0.141267	8.64792e-05	-0.135977	0.000202354
Ispinesib Mesylate	mRNA	ERCC4	CNV	GDSC	-	-	-	-	0.119592	0.000666938	0.133034	0.000102083
Ispinesib Mesylate	mRNA	ERCC4	Expression	GDSC	-	-	-	-	-0.157536	5.06435e-06	-0.155732	6.11421e-06
Ispinesib Mesylate	mRNA	ERCC4	Methylation	GDSC	-	-	-	-	-0.198139	2.16872e-08	-0.197338	3.47587e-08
Itraconazole	mRNA	ERCC4	Methylation	CellMiner	-	-	-	-	-0.352887	0.0494163	-	-
JNK Inhibitor VIII	mRNA	ERCC4	Expression	GDSC	-	-	-	-	-0.132314	0.00218708	-0.159587	0.000208026
JQ1	mRNA	ERCC4	Expression	GDSC	-	-	-	-	-0.115988	0.00138632	-0.115441	0.00161604
JQ1	mRNA	ERCC4	Methylation	GDSC	-	-	-	-	-0.140744	0.000141635	-0.145182	0.00012383
JW-7-24-1	mRNA	ERCC4	Expression	GDSC	-	-	-	-	-0.163439	2.13838e-06	-0.14314	3.56558e-05
JW-7-24-1	mRNA	ERCC4	Methylation	GDSC	-	-	-	-	-0.179217	3.15437e-07	-0.174595	8.42738e-07
KIN001-236	mRNA	ERCC4	CNV	GDSC	-	-	-	-	0.0871814	0.0167741	0.0956943	0.00836647
KIN001-236	mRNA	ERCC4	Expression	GDSC	-	-	-	-	-0.21573	1.20826e-10	-0.200454	2.88123e-09
KIN001-236	mRNA	ERCC4	Methylation	GDSC	-	-	-	-	-0.172767	7.03848e-07	-0.154101	1.64514e-05
KIN001-244	mRNA	ERCC4	CNV	GDSC	-	-	-	-	0.116387	0.000918584	0.117402	0.000793723
KIN001-244	mRNA	ERCC4	Expression	GDSC	-	-	-	-	-0.155728	6.71539e-06	-0.171209	6.58134e-07
KIN001-244	mRNA	ERCC4	Methylation	GDSC	-	-	-	-	-0.167072	2.45006e-06	-0.154921	2.13356e-05
KIN001-260	mRNA	ERCC4	CNV	GDSC	-	-	-	-	0.0826553	0.0160357	0.0988776	0.00345211
KIN001-260	mRNA	ERCC4	Expression	GDSC	-	-	-	-	-0.230101	4.5152e-12	-0.226622	9.87792e-12
KIN001-260	mRNA	ERCC4	Methylation	GDSC	-	-	-	-	-0.217681	2.39732e-10	-0.214522	6.85295e-10
KIN001-266	mRNA	ERCC4	Expression	GDSC	-	-	-	-	-0.109995	0.00292571	-0.111735	0.00197438
KIN001-266	mRNA	ERCC4	Methylation	GDSC	-	-	-	-	-0.127251	0.000939273	-0.122523	0.00158705
KIN001-270	mRNA	ERCC4	CNV	GDSC	-	-	-	-	0.110441	0.00231264	0.119264	0.000836429
KIN001-270	mRNA	ERCC4	Expression	GDSC	-	-	-	-	-0.214458	1.96848e-10	-0.195627	7.88055e-09
KIN001-270	mRNA	ERCC4	Methylation	GDSC	-	-	-	-	-0.142413	6.04694e-05	-0.147828	4.04107e-05
kinetin riboside	mRNA	ERCC4	Methylation	CellMiner	-	-	-	-	0.4885	0.0029895	0.498256	0.00138466
KU-55933	mRNA	ERCC4	CNV	GDSC	-	-	-	-	0.0897092	0.0386689	0.101966	0.0115215
KU-55933	mRNA	ERCC4	Expression	GDSC	-	-	-	-	-0.13959	0.000111667	-0.119273	0.00132808
KU-55933	mRNA	ERCC4	Methylation	GDSC	-	-	-	-	-0.0883382	0.0217077	-	-
Lenalidomide	mRNA	ERCC4	Expression	GDSC	-	-	-	-	-0.251578	1.38603e-13	-0.224621	6.52242e-11
Lenalidomide	mRNA	ERCC4	Methylation	GDSC	-	-	-	-	-0.111077	0.00273078	-0.105093	0.00548907
Lestaurtinib	mRNA	ERCC4	CNV	GDSC	-	-	-	-	0.109759	0.00163952	0.103332	0.00412727
Lestaurtinib	mRNA	ERCC4	Expression	GDSC	-	-	-	-	-0.0955724	0.0106084	-0.110064	0.00281378
LFM-A13	mRNA	ERCC4	Expression	GDSC	-	-	-	-	-0.10392	0.0136209	-0.109028	0.0109742
Linifanib	mRNA	ERCC4	CNV	GDSC	-	-	-	-	0.116982	0.00239081	-	-
Linifanib	mRNA	ERCC4	Expression	GDSC	-	-	-	-	-	-	-0.139761	8.97671e-05
Linifanib	mRNA	ERCC4	Methylation	GDSC	-	-	-	-	-0.0936578	0.0140875	-	-
Luminespib	mRNA	ERCC4	Expression	GDSC	-	-	-	-	-0.0876376	0.0468751	-	-
mannich bases	mRNA	ERCC4	Methylation	CellMiner	-	-	-	-	0.409181	0.0435674	-	-
Masitinib	mRNA	ERCC4	CNV	GDSC	-	-	-	-	0.09936	0.00500579	0.103723	0.00305778
Masitinib	mRNA	ERCC4	Expression	GDSC	-	-	-	-	-0.116012	0.00091976	-0.14266	3.43171e-05
Masitinib	mRNA	ERCC4	Methylation	GDSC	-	-	-	-	-0.124537	0.000629932	-0.119719	0.0011415
Methotrexate	mRNA	ERCC4	Expression	GDSC	-	-	-	-	-0.220383	4.30066e-11	-0.201592	2.2938e-09
Methotrexate	mRNA	ERCC4	Methylation	GDSC	-	-	-	-	-0.224515	5.52324e-11	-0.201873	9.66043e-09
methoxyelliptione	mRNA	ERCC4	Methylation	CellMiner	-	-	-	-	0.385981	0.0401856	-	-
Mitomycin-C	mRNA	ERCC4	CNV	GDSC	-	-	-	-	0.10194	0.0207577	0.116359	0.0043371
Motesanib	mRNA	ERCC4	Expression	GDSC	-	-	-	-	-	-	-0.11477	0.0153659
MPS-1-IN-1	mRNA	ERCC4	CNV	GDSC	-	-	-	-	0.0807722	0.0279616	0.0835686	0.0238933
MPS-1-IN-1	mRNA	ERCC4	Expression	GDSC	-	-	-	-	-0.144686	3.02227e-05	-0.137126	7.27193e-05
MPS-1-IN-1	mRNA	ERCC4	Methylation	GDSC	-	-	-	-	-0.166351	3.61711e-06	-0.172631	1.73195e-06
N-(4-Chloro-3-((3-Methyl-2-Butenyl)Oxy)Phenyl)-2-Methyl-3-Furancarbothioamide	mRNA	ERCC4	Mutation	CellMiner	-3.54219	0.0213196	-	-	-	-	-	-
Navitoclax	mRNA	ERCC4	CNV	GDSC	-	-	-	-	0.107125	0.00183108	0.112779	0.000956388
Navitoclax	mRNA	ERCC4	Expression	GDSC	-	-	-	-	-0.103255	0.00310243	-0.0816941	0.0237643
Navitoclax	mRNA	ERCC4	Methylation	GDSC	-	-	-	-	-0.275969	6.56573e-16	-0.220076	7.78133e-10
NG-25	mRNA	ERCC4	CNV	GDSC	-	-	-	-	0.123238	0.000281535	0.126661	0.000213057
NG-25	mRNA	ERCC4	Expression	GDSC	-	-	-	-	-0.124831	0.00031297	-0.145337	2.55554e-05
NG-25	mRNA	ERCC4	Methylation	GDSC	-	-	-	-	-0.183089	1.54822e-07	-0.159011	9.18917e-06
NPK76-II-72-1	mRNA	ERCC4	CNV	GDSC	-	-	-	-	0.0809624	0.019966	0.0878622	0.0107095
NPK76-II-72-1	mRNA	ERCC4	Expression	GDSC	-	-	-	-	-0.201573	1.72636e-09	-0.194768	6.2886e-09
NPK76-II-72-1	mRNA	ERCC4	Methylation	GDSC	-	-	-	-	-0.232642	1.21643e-11	-0.2261	7.18421e-11
NSC-207895	mRNA	ERCC4	CNV	GDSC	-	-	-	-	0.134684	0.000725751	0.136183	0.000710196
NSC-207895	mRNA	ERCC4	Methylation	GDSC	-	-	-	-	-0.147631	8.60667e-05	-0.159278	2.10886e-05
NSC-87877	mRNA	ERCC4	Expression	GDSC	-	-	-	-	-0.127812	0.00203945	-0.158399	1.93629e-05
NU7441	mRNA	ERCC4	CNV	GDSC	-	-	-	-	0.0970736	0.0117986	0.0970578	0.0140501
NU7441	mRNA	ERCC4	Expression	GDSC	-	-	-	-	-0.108676	0.00498822	-0.0995572	0.0163817
Nutlin-3	mRNA	ERCC4	Mutation	CCLE	3.91087	0.000201146	-	-	-	-	-	-
Nutlin-3a (-)	mRNA	ERCC4	CNV	GDSC	-	-	-	-	0.132871	7.60838e-05	0.137777	4.34651e-05
Nutlin-3a (-)	mRNA	ERCC4	Expression	GDSC	-	-	-	-	-0.0956716	0.0103458	-0.116894	0.00143116
NVP-BHG712	mRNA	ERCC4	CNV	GDSC	-	-	-	-	0.108606	0.00205871	0.099692	0.0048585
NVP-BHG712	mRNA	ERCC4	Expression	GDSC	-	-	-	-	-0.116371	0.000834289	-0.126837	0.000265895
NVP-BHG712	mRNA	ERCC4	Methylation	GDSC	-	-	-	-	-0.187084	9.01952e-08	-0.172718	1.48162e-06
Obatoclax Mesylate	mRNA	ERCC4	Methylation	GDSC	-	-	-	-	-	-	-0.0808627	0.0438817
Olaparib	mRNA	ERCC4	CNV	GDSC	-	-	-	-	0.111926	0.00432561	0.111468	0.00402279
Olaparib	mRNA	ERCC4	Expression	GDSC	-	-	-	-	-0.129496	0.000459972	-0.152755	3.14215e-05
Omipalisib	mRNA	ERCC4	Expression	GDSC	-	-	-	-	-0.110438	0.00259554	-0.0952292	0.0108377
Omipalisib	mRNA	ERCC4	Methylation	GDSC	-	-	-	-	-0.188171	1.68925e-07	-0.175262	2.60423e-06
ortho-topolin riboside	mRNA	ERCC4	Methylation	CellMiner	-	-	-	-	-	-	0.480819	0.0263625
OSI-027	mRNA	ERCC4	CNV	GDSC	-	-	-	-	0.0769313	0.0416076	0.0957009	0.00840954
OSI-027	mRNA	ERCC4	Expression	GDSC	-	-	-	-	-0.115521	0.00106	-0.101487	0.00386727
OSI-027	mRNA	ERCC4	Methylation	GDSC	-	-	-	-	-0.197151	1.86948e-08	-0.209966	2.45325e-09
OSI-930	mRNA	ERCC4	CNV	GDSC	-	-	-	-	0.10591	0.00815085	0.103681	0.0112293
OSI-930	mRNA	ERCC4	Expression	GDSC	-	-	-	-	-0.135308	8.22376e-05	-0.137066	6.39157e-05
OSI-930	mRNA	ERCC4	Methylation	GDSC	-	-	-	-	-0.187657	7.58903e-08	-0.160355	8.06097e-06
OSU-03012	mRNA	ERCC4	CNV	GDSC	-	-	-	-	0.0876153	0.0253244	0.0918861	0.0270596
OSU-03012	mRNA	ERCC4	Methylation	GDSC	-	-	-	-	-	-	-0.0874832	0.0269341
PAC-1	mRNA	ERCC4	Expression	GDSC	-	-	-	-	-0.103782	0.00386772	-0.0964194	0.00725622
PAC-1	mRNA	ERCC4	Methylation	GDSC	-	-	-	-	-0.179786	3.88633e-07	-0.165238	7.4565e-06
Paclitaxel	mRNA	ERCC4	Mutation	CCLE	-4.47299	4.35047e-05	-	-	-	-	-	-
Palbociclib	mRNA	ERCC4	CNV	GDSC	-	-	-	-	0.0889553	0.01677	0.0920789	0.0174693
pan (van)	mRNA	ERCC4	Methylation	CellMiner	-	-	-	-	-	-	0.467523	0.0188236
Pazopanib	mRNA	ERCC4	Expression	GDSC	-	-	-	-	-0.0884492	0.0496996	-	-
PD-0325901	mRNA	ERCC4	Expression	CCLE	-	-	-	-	0.171389	0.0447314	-	-
PD0325901	mRNA	ERCC4	Expression	GDSC	-	-	-	-	0.147818	2.48851e-05	0.15041	1.5298e-05
PD0325901	mRNA	ERCC4	Methylation	GDSC	-	-	-	-	0.214151	2.21761e-09	0.220997	5.38628e-10
PD173074	mRNA	ERCC4	Expression	GDSC	-	-	-	-	-0.1468	6.19101e-05	-0.154929	1.58245e-05
Pelitinib	mRNA	ERCC4	Methylation	GDSC	-	-	-	-	-0.135431	0.000163372	-0.144421	5.26188e-05
pentamide	mRNA	ERCC4	Methylation	CellMiner	-	-	-	-	-	-	-0.365516	0.0269672
pentamidine isethionate	mRNA	ERCC4	Methylation	CellMiner	-	-	-	-	-0.35652	0.0423023	-	-
PF-4708671	mRNA	ERCC4	Expression	GDSC	-	-	-	-	-0.10034	0.0144097	-0.105751	0.00764392
PFI-1	mRNA	ERCC4	Expression	GDSC	-	-	-	-	-0.115667	0.00302885	-0.124986	0.0012401
PFI-3	mRNA	ERCC4	CNV	GDSC	-	-	-	-	0.0754869	0.0409942	0.078925	0.035185
PFI-3	mRNA	ERCC4	Expression	GDSC	-	-	-	-	-0.170452	8.34664e-07	-0.163579	2.01874e-06
PFI-3	mRNA	ERCC4	Methylation	GDSC	-	-	-	-	-0.117308	0.00128116	-0.133578	0.000243952
PHA-793887	mRNA	ERCC4	CNV	GDSC	-	-	-	-	0.11323	0.00183272	0.126842	0.000550752
PHA-793887	mRNA	ERCC4	Expression	GDSC	-	-	-	-	-0.149415	1.23748e-05	-0.125124	0.00027605
PHA-793887	mRNA	ERCC4	Methylation	GDSC	-	-	-	-	-0.235615	5.77586e-12	-0.240787	4.22679e-12
Phenformin	mRNA	ERCC4	Expression	GDSC	-	-	-	-	-0.0869791	0.0172155	-0.0986446	0.00590302
Phenformin	mRNA	ERCC4	Methylation	GDSC	-	-	-	-	-0.173236	1.77804e-06	-0.172041	3.41897e-06
PI-103	mRNA	ERCC4	CNV	GDSC	-	-	-	-	-	-	0.092661	0.0173823
PI-103	mRNA	ERCC4	Expression	GDSC	-	-	-	-	-0.168974	9.5938e-07	-0.15308	1.0215e-05
PI-103	mRNA	ERCC4	Methylation	GDSC	-	-	-	-	-0.251788	2.62219e-13	-0.252681	3.48607e-13
PIK-93	mRNA	ERCC4	Expression	GDSC	-	-	-	-	-0.177408	1.75251e-07	-0.168651	7.96535e-07
PIK-93	mRNA	ERCC4	Methylation	GDSC	-	-	-	-	-0.214974	4.60272e-10	-0.20378	7.19378e-09
Piperlongumine	mRNA	ERCC4	Expression	GDSC	-	-	-	-	-	-	-0.0964453	0.0184773
PLX-4720	mRNA	ERCC4	CNV	GDSC	-	-	-	-	-	-	0.0956926	0.0162229
podophyllotoxin	mRNA	ERCC4	Methylation	CellMiner	-	-	-	-	-	-	0.382658	0.0364469
Ponatinib	mRNA	ERCC4	CNV	GDSC	-	-	-	-	0.092655	0.0153328	-	-
Ponatinib	mRNA	ERCC4	Methylation	GDSC	-	-	-	-	-0.0944837	0.0104793	-	-
protein toxin a 23 - mw approx. 6700	mRNA	ERCC4	Methylation	CellMiner	-	-	-	-	-0.345936	0.0396365	-0.328075	0.0423103
protein toxin b 15 - mw approx 6700	mRNA	ERCC4	Methylation	CellMiner	-	-	-	-	-	-	-0.336234	0.0462458
protein toxin c 10 - mw approx. 6700	mRNA	ERCC4	Methylation	CellMiner	-	-	-	-	-0.390757	0.009459	-0.394347	0.00916482
protein toxin d 5 - mw approx 6700	mRNA	ERCC4	Methylation	CellMiner	-	-	-	-	-0.344775	0.0384853	-	-
QL-X-138	mRNA	ERCC4	CNV	GDSC	-	-	-	-	0.0921368	0.0199417	0.11758	0.00184049
QL-X-138	mRNA	ERCC4	Expression	GDSC	-	-	-	-	-0.128008	0.000277882	-0.11548	0.00109422
QL-X-138	mRNA	ERCC4	Methylation	GDSC	-	-	-	-	-0.187428	9.41571e-08	-0.191329	6.8919e-08
QL-XI-92	mRNA	ERCC4	CNV	GDSC	-	-	-	-	0.125421	0.000463855	0.128195	0.000406621
QL-XI-92	mRNA	ERCC4	Expression	GDSC	-	-	-	-	-0.137734	5.96724e-05	-0.134359	9.49709e-05
QL-XI-92	mRNA	ERCC4	Methylation	GDSC	-	-	-	-	-0.168746	1.3121e-06	-0.1507	2.37279e-05
QL-XII-47	mRNA	ERCC4	CNV	GDSC	-	-	-	-	0.0941358	0.0252181	0.106303	0.00715034
QL-XII-47	mRNA	ERCC4	Expression	GDSC	-	-	-	-	-0.0888299	0.0188284	-0.088493	0.0173244
QL-XII-47	mRNA	ERCC4	Methylation	GDSC	-	-	-	-	-0.137331	0.000201176	-0.133283	0.000341597
QS11	mRNA	ERCC4	CNV	GDSC	-	-	-	-	-	-	0.0874665	0.0445433
QS11	mRNA	ERCC4	Expression	GDSC	-	-	-	-	-	-	-0.0772904	0.0435584
QS11	mRNA	ERCC4	Methylation	GDSC	-	-	-	-	-0.0837768	0.04594	-0.0926733	0.0281728
Quizartinib	mRNA	ERCC4	Expression	GDSC	-	-	-	-	-0.167173	1.1305e-06	-0.229236	7.77688e-12
Quizartinib	mRNA	ERCC4	Methylation	GDSC	-	-	-	-	-0.177995	4.88135e-07	-0.189575	8.86975e-08
Refametinib	mRNA	ERCC4	Expression	GDSC	-	-	-	-	0.13781	7.54571e-05	0.148987	1.58592e-05
Refametinib	mRNA	ERCC4	Methylation	GDSC	-	-	-	-	0.257007	1.57755e-13	0.274031	2.05845e-15
RO-3306	mRNA	ERCC4	Expression	GDSC	-	-	-	-	-0.137036	0.00315262	-0.150881	0.000792329
Rucaparib	mRNA	ERCC4	Expression	GDSC	-	-	-	-	-0.0916567	0.0296739	-0.100406	0.0181195
Ruxolitinib	mRNA	ERCC4	CNV	GDSC	-	-	-	-	-	-	0.0892872	0.0164021
Ruxolitinib	mRNA	ERCC4	Expression	GDSC	-	-	-	-	-0.175047	3.17851e-07	-0.196037	7.12697e-09
Ruxolitinib	mRNA	ERCC4	Methylation	GDSC	-	-	-	-	-0.145817	4.24767e-05	-0.148817	3.73509e-05
SB505124	mRNA	ERCC4	CNV	GDSC	-	-	-	-	0.075756	0.0285327	0.0716454	0.0368304
SB505124	mRNA	ERCC4	Expression	GDSC	-	-	-	-	-0.130979	0.000362106	-0.136927	0.000141907
SB505124	mRNA	ERCC4	Methylation	GDSC	-	-	-	-	-	-	-0.101994	0.00927561
SB52334	mRNA	ERCC4	CNV	GDSC	-	-	-	-	0.0772167	0.0426519	0.0835608	0.0232137
SB52334	mRNA	ERCC4	Expression	GDSC	-	-	-	-	-0.135743	0.000143048	-0.157897	6.21036e-06
SB52334	mRNA	ERCC4	Methylation	GDSC	-	-	-	-	-0.128221	0.000835756	-0.155497	2.63634e-05
SB590885	mRNA	ERCC4	Expression	GDSC	-	-	-	-	-	-	-0.0884975	0.0239822
Selisistat	mRNA	ERCC4	Expression	GDSC	-	-	-	-	-0.196994	8.47446e-09	-0.186978	3.97159e-08
Selisistat	mRNA	ERCC4	Methylation	GDSC	-	-	-	-	-0.0774195	0.0430337	-0.089758	0.0175137
Selumetinib	mRNA	ERCC4	Expression	GDSC	-	-	-	-	-	-	0.0899455	0.0133459
Selumetinib	mRNA	ERCC4	Methylation	GDSC	-	-	-	-	0.205493	1.22431e-08	0.223409	3.78309e-10
Sepantronium bromide	mRNA	ERCC4	Methylation	GDSC	-	-	-	-	-0.109213	0.0205071	-0.134472	0.00213117
Serdemetan	mRNA	ERCC4	Methylation	GDSC	-	-	-	-	0.100025	0.0294738	0.118668	0.00722683
SGC0946	mRNA	ERCC4	Expression	GDSC	-	-	-	-	-0.171777	8.80681e-07	-0.181696	1.49938e-07
Shikonin	mRNA	ERCC4	Methylation	GDSC	-	-	-	-	-0.090299	0.0213265	-0.111929	0.00359216
SL0101	mRNA	ERCC4	Expression	GDSC	-	-	-	-	-0.169779	2.36671e-06	-0.174886	1.33091e-06
SL0101	mRNA	ERCC4	Methylation	GDSC	-	-	-	-	-0.111162	0.00470471	-0.100284	0.0147435
SN-38	mRNA	ERCC4	CNV	GDSC	-	-	-	-	0.169649	2.68104e-06	0.159763	2.28668e-05
SNX-2112	mRNA	ERCC4	CNV	GDSC	-	-	-	-	0.097499	0.00647828	0.113119	0.00123945
SNX-2112	mRNA	ERCC4	Expression	GDSC	-	-	-	-	-0.130984	0.000191954	-0.13015	0.000190339
SNX-2112	mRNA	ERCC4	Methylation	GDSC	-	-	-	-	-0.12065	0.000916906	-0.127137	0.000487069
sri 1215	mRNA	ERCC4	Methylation	CellMiner	-	-	-	-	-	-	0.31742	0.0298795
STF-62247	mRNA	ERCC4	CNV	GDSC	-	-	-	-	0.0833281	0.0236036	0.100166	0.00516923
STF-62247	mRNA	ERCC4	Expression	GDSC	-	-	-	-	-0.161898	2.24639e-06	-0.157138	4.36042e-06
STF-62247	mRNA	ERCC4	Methylation	GDSC	-	-	-	-	-0.149991	2.02862e-05	-0.152381	2.15058e-05
STF-62247	mRNA	ERCC4	Mutation	GDSC	-	-	0	0.0455015	-	-	-	-
T0901317	mRNA	ERCC4	CNV	GDSC	-	-	-	-	0.124674	0.000244451	0.11223	0.000941448
T0901317	mRNA	ERCC4	Expression	GDSC	-	-	-	-	-0.187421	2.68078e-08	-0.196289	4.93998e-09
T0901317	mRNA	ERCC4	Methylation	GDSC	-	-	-	-	-0.176328	3.96925e-07	-0.170714	1.42916e-06
TAK-715	mRNA	ERCC4	CNV	GDSC	-	-	-	-	0.11798	0.00083686	0.132671	0.000114069
TAK-715	mRNA	ERCC4	Expression	GDSC	-	-	-	-	-0.173281	3.16193e-07	-0.150454	8.94941e-06
TAK-715	mRNA	ERCC4	Methylation	GDSC	-	-	-	-	-0.221123	1.38866e-10	-0.219808	3.1554e-10
Talazoparib	mRNA	ERCC4	CNV	GDSC	-	-	-	-	0.104105	0.0270786	-	-
Talazoparib	mRNA	ERCC4	Methylation	GDSC	-	-	-	-	-	-	0.0878057	0.038935
Tamoxifen	mRNA	ERCC4	CNV	GDSC	-	-	-	-	0.0766733	0.043409	-	-
Tamoxifen	mRNA	ERCC4	Expression	GDSC	-	-	-	-	-0.163217	3.24967e-06	-0.171767	8.38196e-07
Tamoxifen	mRNA	ERCC4	Methylation	GDSC	-	-	-	-	-0.0927687	0.0154379	-0.0980423	0.0114909
Tanespimycin	mRNA	ERCC4	Expression	GDSC	-	-	-	-	0.10065	0.00426166	0.0959477	0.00604743
Tanespimycin	mRNA	ERCC4	Methylation	GDSC	-	-	-	-	0.268176	9.98833e-15	0.286791	6.0497e-17
Temozolomide	mRNA	ERCC4	CNV	GDSC	-	-	-	-	-	-	0.0812513	0.0452683
Temozolomide	mRNA	ERCC4	Expression	GDSC	-	-	-	-	-0.156771	6.73306e-06	-0.180714	1.59575e-07
Temozolomide	mRNA	ERCC4	Methylation	GDSC	-	-	-	-	-0.104871	0.00398028	-0.105099	0.00463576
Temsirolimus	mRNA	ERCC4	Expression	GDSC	-	-	-	-	-0.153056	3.74082e-05	-0.142447	0.000188064
THZ-2-102-1	mRNA	ERCC4	CNV	GDSC	-	-	-	-	0.0897312	0.0120575	0.106223	0.00282847
THZ-2-102-1	mRNA	ERCC4	Expression	GDSC	-	-	-	-	-0.158563	4.57757e-06	-0.17223	4.75818e-07
THZ-2-102-1	mRNA	ERCC4	Methylation	GDSC	-	-	-	-	-0.216021	7.78306e-10	-0.220313	3.97925e-10
THZ-2-49	mRNA	ERCC4	Expression	GDSC	-	-	-	-	-0.133295	0.00018161	-0.123702	0.000501494
THZ-2-49	mRNA	ERCC4	Methylation	GDSC	-	-	-	-	-0.110708	0.00294061	-0.125938	0.000757822
Tivozanib	mRNA	ERCC4	CNV	GDSC	-	-	-	-	0.120076	0.000618554	0.117032	0.000594593
Tivozanib	mRNA	ERCC4	Expression	GDSC	-	-	-	-	-0.130872	0.000163416	-0.186027	4.15443e-08
Tivozanib	mRNA	ERCC4	Methylation	GDSC	-	-	-	-	-0.145742	4.33914e-05	-0.131924	0.000260812
TL-1-85	mRNA	ERCC4	CNV	GDSC	-	-	-	-	0.104	0.00240648	0.109541	0.00146917
TL-1-85	mRNA	ERCC4	Expression	GDSC	-	-	-	-	-0.120217	0.00050876	-0.150233	1.18419e-05
TL-1-85	mRNA	ERCC4	Methylation	GDSC	-	-	-	-	-0.159129	5.74294e-06	-0.14154	7.85165e-05
TL-2-105	mRNA	ERCC4	CNV	GDSC	-	-	-	-	-	-	0.0832316	0.0186856
TL-2-105	mRNA	ERCC4	Expression	GDSC	-	-	-	-	-0.191964	1.24472e-08	-0.218527	6.3166e-11
TL-2-105	mRNA	ERCC4	Methylation	GDSC	-	-	-	-	-0.234865	7.68039e-12	-0.224095	1.16249e-10
TPCA-1	mRNA	ERCC4	CNV	GDSC	-	-	-	-	0.106296	0.00206331	0.10705	0.00166771
TPCA-1	mRNA	ERCC4	Expression	GDSC	-	-	-	-	-0.137303	6.46121e-05	-0.135937	7.6847e-05
TPCA-1	mRNA	ERCC4	Methylation	GDSC	-	-	-	-	-0.201695	6.27083e-09	-0.190911	6.60289e-08
Trametinib	mRNA	ERCC4	Expression	GDSC	-	-	-	-	0.140896	4.66079e-05	0.148611	1.50227e-05
Trametinib	mRNA	ERCC4	Methylation	GDSC	-	-	-	-	0.249827	8.63142e-13	0.266016	1.6028e-14
Tretinoin	mRNA	ERCC4	CNV	GDSC	-	-	-	-	0.0741932	0.0422707	-	-
Tretinoin	mRNA	ERCC4	Expression	GDSC	-	-	-	-	-0.188373	6.14273e-08	-0.196468	2.98912e-08
Tretinoin	mRNA	ERCC4	Methylation	GDSC	-	-	-	-	-0.110474	0.00399206	-0.0892459	0.0312636
Tubastatin A	mRNA	ERCC4	CNV	GDSC	-	-	-	-	0.0848569	0.0191323	0.100765	0.00478622
Tubastatin A	mRNA	ERCC4	Expression	GDSC	-	-	-	-	-0.170721	4.38921e-07	-0.147615	1.38913e-05
Tubastatin A	mRNA	ERCC4	Methylation	GDSC	-	-	-	-	-0.220741	1.28125e-10	-0.205546	4.29101e-09
TW 37	mRNA	ERCC4	Expression	GDSC	-	-	-	-	-0.1188	0.00258473	-0.124742	0.00144208
UNC0638	mRNA	ERCC4	Expression	GDSC	-	-	-	-	-0.187482	4.20202e-08	-0.187724	3.50908e-08
UNC0638	mRNA	ERCC4	Methylation	GDSC	-	-	-	-	-0.139516	0.000112331	-0.14956	3.49987e-05
UNC1215	mRNA	ERCC4	Expression	GDSC	-	-	-	-	-0.216022	1.57495e-10	-0.20995	5.32841e-10
UNC1215	mRNA	ERCC4	Methylation	GDSC	-	-	-	-	-0.142615	6.44449e-05	-0.139714	0.000111603
Veliparib	mRNA	ERCC4	CNV	GDSC	-	-	-	-	0.074256	0.0411641	0.0754771	0.0381478
Veliparib	mRNA	ERCC4	Expression	GDSC	-	-	-	-	-0.189413	9.12772e-08	-0.200202	1.42059e-08
Veliparib	mRNA	ERCC4	Methylation	GDSC	-	-	-	-	-0.0802715	0.0449015	-0.0817741	0.0428933
Vinblastine	mRNA	ERCC4	CNV	GDSC	-	-	-	-	0.0731139	0.0420258	0.0765378	0.0309539
Vinblastine	mRNA	ERCC4	Expression	GDSC	-	-	-	-	-0.172685	3.37186e-06	-0.1844	8.19829e-07
Vismodegib	mRNA	ERCC4	CNV	GDSC	-	-	-	-	0.0731955	0.0343339	0.0950199	0.00623955
Vismodegib	mRNA	ERCC4	Expression	GDSC	-	-	-	-	-0.222849	1.00407e-10	-0.195747	2.14032e-08
Vismodegib	mRNA	ERCC4	Methylation	GDSC	-	-	-	-	-0.0966667	0.0107133	-0.0922173	0.0197754
VNLG/124	mRNA	ERCC4	CNV	GDSC	-	-	-	-	0.0802292	0.0314549	-	-
VNLG/124	mRNA	ERCC4	Expression	GDSC	-	-	-	-	-0.157989	3.77061e-06	-0.175681	2.43797e-07
VNLG/124	mRNA	ERCC4	Methylation	GDSC	-	-	-	-	-0.135748	0.00014724	-0.122802	0.000763326
Vorinostat	mRNA	ERCC4	Expression	GDSC	-	-	-	-	-0.202526	2.1452e-09	-0.215973	1.14815e-10
Vorinostat	mRNA	ERCC4	Methylation	GDSC	-	-	-	-	-0.155768	1.41271e-05	-0.170439	1.95164e-06
VX-11e	mRNA	ERCC4	CNV	GDSC	-	-	-	-	0.0808334	0.048345	0.0906435	0.0131606
VX-702	mRNA	ERCC4	CNV	GDSC	-	-	-	-	0.113301	0.000964553	0.121063	0.000449491
VX-702	mRNA	ERCC4	Expression	GDSC	-	-	-	-	-0.225671	3.64631e-11	-0.218908	1.36011e-10
VX-702	mRNA	ERCC4	Methylation	GDSC	-	-	-	-	-0.115227	0.00190566	-0.104065	0.00571433
WHI-P97	mRNA	ERCC4	CNV	GDSC	-	-	-	-	0.102623	0.0151857	0.0929273	0.03128
WHI-P97	mRNA	ERCC4	Expression	GDSC	-	-	-	-	-0.080345	0.0465509	-0.0963317	0.0121559
WHI-P97	mRNA	ERCC4	Methylation	GDSC	-	-	-	-	-0.114809	0.00264242	-0.141534	0.000175669
WZ3105	mRNA	ERCC4	CNV	GDSC	-	-	-	-	-	-	0.0856704	0.0335527
WZ3105	mRNA	ERCC4	Expression	GDSC	-	-	-	-	-0.148975	1.66445e-05	-0.150874	1.14999e-05
WZ3105	mRNA	ERCC4	Methylation	GDSC	-	-	-	-	-0.254704	1.87694e-13	-0.260016	8.58214e-14
XMD13-2	mRNA	ERCC4	CNV	GDSC	-	-	-	-	0.0784494	0.024542	0.0919484	0.00887887
XMD13-2	mRNA	ERCC4	Expression	GDSC	-	-	-	-	-0.18875	2.29615e-08	-0.176357	1.96925e-07
XMD13-2	mRNA	ERCC4	Methylation	GDSC	-	-	-	-	-0.212285	7.82826e-10	-0.208568	2.65533e-09
XMD14-99	mRNA	ERCC4	CNV	GDSC	-	-	-	-	0.111442	0.00143486	0.126185	0.000237747
XMD14-99	mRNA	ERCC4	Expression	GDSC	-	-	-	-	-0.165031	1.12381e-06	-0.139079	4.60853e-05
XMD14-99	mRNA	ERCC4	Methylation	GDSC	-	-	-	-	-0.181117	1.71907e-07	-0.151376	2.14207e-05
XMD15-27	mRNA	ERCC4	CNV	GDSC	-	-	-	-	0.0853716	0.0162063	0.0983416	0.00568589
XMD15-27	mRNA	ERCC4	Expression	GDSC	-	-	-	-	-0.208078	8.20574e-10	-0.196004	8.52047e-09
XMD15-27	mRNA	ERCC4	Methylation	GDSC	-	-	-	-	-0.122516	0.000621707	-0.107026	0.00384265
Y-39983	mRNA	ERCC4	CNV	GDSC	-	-	-	-	0.0920855	0.00928205	0.0978745	0.00602881
Y-39983	mRNA	ERCC4	Expression	GDSC	-	-	-	-	-0.176379	2.35494e-07	-0.15928	3.57584e-06
Y-39983	mRNA	ERCC4	Methylation	GDSC	-	-	-	-	-0.0955131	0.00897447	-0.0998319	0.0071372
YM201636	mRNA	ERCC4	CNV	GDSC	-	-	-	-	0.0839282	0.0145385	0.0926728	0.00658938
YM201636	mRNA	ERCC4	Expression	GDSC	-	-	-	-	-0.184718	6.32803e-08	-0.187315	3.6368e-08
YM201636	mRNA	ERCC4	Methylation	GDSC	-	-	-	-	-0.177899	5.28653e-07	-0.185714	2.08199e-07
Zibotentan	mRNA	ERCC4	Expression	GDSC	-	-	-	-	-0.195877	7.42921e-09	-0.196269	6.82835e-09
Zibotentan	mRNA	ERCC4	Methylation	GDSC	-	-	-	-	-0.116354	0.00126008	-0.118344	0.00119927
ZSTK474	mRNA	ERCC4	Expression	GDSC	-	-	-	-	-0.123229	0.000477292	-0.101826	0.0046766
ZSTK474	mRNA	ERCC4	Methylation	GDSC	-	-	-	-	-0.211611	1.23279e-09	-0.188499	1.81985e-07

## Sheet: hsa-mir-200c
the relationship between hsa-mir-200c and drug sensitivity
Compound	RNAtype	RNAmolecule	Omics	Source	T.stat	T.fdr	Chi.stat	Chi.fdr	Pearson.stat	Pearson.fdr	Spearman.stat	Spearman.fdr	Details
(+)-neocryptotanshinone	miRNA	hsa-mir-200c	Expression	CellMiner	-	-	-	-	-	-	-0.479211	0.0342013
.alpha.-sarcin	miRNA	hsa-mir-200c	Expression	CellMiner	-	-	-	-	-0.528076	0.0033906	-0.549742	0.00118981
1,2 benzo-8-(1-hydroxy-2-methylamino propane)-3-phenoxazone	miRNA	hsa-mir-200c	Expression	CellMiner	-	-	-	-	-0.533313	0.00162834	-0.566993	0.000740814
1,2-benzo-8-(l-alanyl)-3-phenoxazone nitrate salt	miRNA	hsa-mir-200c	Expression	CellMiner	-	-	-	-	-	-	-0.465511	0.028441
1,2-hydroxy-3-naphthoic acid	miRNA	hsa-mir-200c	Expression	CellMiner	-	-	-	-	-0.441504	0.0110637	-	-
10,11-methylenedioxycamptothecin	miRNA	hsa-mir-200c	Expression	CellMiner	-	-	-	-	-	-	-0.449114	0.0203466
2-(1-propynyl)-3,17.beta.-estradiol	miRNA	hsa-mir-200c	Expression	CellMiner	-	-	-	-	-	-	-0.416342	0.045964
2-benzoyloxymethyl-1,4-naphthoquinone	miRNA	hsa-mir-200c	Expression	CellMiner	-	-	-	-	-0.396905	0.0152158	-	-
2-ethenyl estradiol	miRNA	hsa-mir-200c	Expression	CellMiner	-	-	-	-	-0.465699	0.0259105	-	-
2-ethoxy-6-keto-estradiol	miRNA	hsa-mir-200c	Expression	CellMiner	-	-	-	-	-0.416173	0.0489777	-	-
2-ethoxyestra-1,3,5-trien-3,17.beta.-diol	miRNA	hsa-mir-200c	Expression	CellMiner	-	-	-	-	-0.480426	0.00544108	-	-
2-propenyl estradiol	miRNA	hsa-mir-200c	Expression	CellMiner	-	-	-	-	-0.426649	0.0366234	-	-
3-(4-fluorophenyl)-3-(4-acetoxy-2-methylphenyl)phthalide	miRNA	hsa-mir-200c	Expression	CellMiner	-	-	-	-	0.443312	0.02276	0.467713	0.0174972
4(1h)-quinolinone, 6-(1-pyrrolidinyl)-2-(3- methoxyphenyl)-	miRNA	hsa-mir-200c	Expression	CellMiner	-	-	-	-	-	-	-0.496791	0.00574594
7-(.beta.-d-ribofuranosyl)-4-aminothieno[3,4-d]pyrimidine	miRNA	hsa-mir-200c	Expression	CellMiner	-	-	-	-	0.408615	0.0437471	-	-
9-acetamido-10-hydroxy-20-(s)-camptothecin	miRNA	hsa-mir-200c	Expression	CellMiner	-	-	-	-	-0.467484	0.0097072	-0.471275	0.0129981
9-amino-10-methoxy-20(s)-camptothecin	miRNA	hsa-mir-200c	Expression	CellMiner	-	-	-	-	-0.428032	0.0302298	-0.440175	0.0278077
9-nitro-10-hydroxy-20(s)-camptothecin	miRNA	hsa-mir-200c	Expression	CellMiner	-	-	-	-	-0.485697	0.00489214	-0.464716	0.0146369
9-nitro-10-methoxy-20(s)-camptothecin	miRNA	hsa-mir-200c	Expression	CellMiner	-	-	-	-	-0.43749	0.0369163	-0.445085	0.0336357
9-succinamido-20(rs)-camptothecin, sodium salt	miRNA	hsa-mir-200c	Expression	CellMiner	-	-	-	-	-0.411696	0.0362164	-	-
a 8671k119	miRNA	hsa-mir-200c	Expression	CellMiner	-	-	-	-	-0.415227	0.0378433	-0.500349	0.00497881
analog of cc-1065	miRNA	hsa-mir-200c	Expression	CellMiner	-	-	-	-	-	-	-0.455834	0.0226669
antineoplastic-642198	miRNA	hsa-mir-200c	Expression	CellMiner	-	-	-	-	-0.4421	0.047322	-	-
antineoplastic-647246	miRNA	hsa-mir-200c	Expression	CellMiner	-	-	-	-	-0.445173	0.0346344	-	-
antineoplastic-d613939	miRNA	hsa-mir-200c	Expression	CellMiner	-	-	-	-	-	-	-0.400463	0.0373358
Asaley	miRNA	hsa-mir-200c	Expression	CellMiner	-	-	-	-	-0.397022	0.015504	-0.431113	0.0110993
AZQ	miRNA	hsa-mir-200c	Expression	CellMiner	-	-	-	-	-0.414686	0.0236427	-0.473514	0.00665671
basic yellow k	miRNA	hsa-mir-200c	Expression	CellMiner	-	-	-	-	0.390165	0.048151	-	-
benzo[1,2-b:4,5-b']dithiophene-4,8-diol, dipropionate	miRNA	hsa-mir-200c	Expression	CellMiner	-	-	-	-	-0.601692	8.61748e-05	-0.580227	0.000376317
benzo[1,2-b:4,5-b']dithiophene-4,8-dione, 2-acetyl-	miRNA	hsa-mir-200c	Expression	CellMiner	-	-	-	-	-0.533236	0.00269449	-0.507446	0.0111702
benzo[1,2-b:4,5-b']dithiophene-4,8-dione, 2-nitro-	miRNA	hsa-mir-200c	Expression	CellMiner	-	-	-	-	-	-	-0.384638	0.0289281
benzo[1,2-b:5,4-b']dithiophene-2-carboxaldehyde, 4,8-dioxo-	miRNA	hsa-mir-200c	Expression	CellMiner	-	-	-	-	-0.485492	0.0197243	-0.52202	0.00602491
benzo[1,2-b:5,4-b']dithiophene-4,8-dione, 2-acetyl-	miRNA	hsa-mir-200c	Expression	CellMiner	-	-	-	-	-0.517069	0.0054679	-0.542225	0.00243895
benzo[g]quinoxaline-5,10-dione, 5,10-dihydro-2,3-dimethyl-	miRNA	hsa-mir-200c	Expression	CellMiner	-	-	-	-	-0.476025	0.0121415	-0.426531	0.0439261
c8, carbonyl prodigiosine	miRNA	hsa-mir-200c	Expression	CellMiner	-	-	-	-	-0.372777	0.0455309	-0.422231	0.0413768
Carboplatin	miRNA	hsa-mir-200c	Expression	CellMiner	-	-	-	-	-	-	-0.461893	0.0193604
Chlorambucil	miRNA	hsa-mir-200c	Expression	CellMiner	-	-	-	-	-	-	-0.402848	0.0376649
Chlorozotocin	miRNA	hsa-mir-200c	Expression	CellMiner	-	-	-	-	-0.462257	0.0234688	-0.536305	0.00159906
Cisplatin	miRNA	hsa-mir-200c	Expression	CellMiner	-	-	-	-	-0.501932	0.00389401	-0.52364	0.00561534
Clomesone	miRNA	hsa-mir-200c	Expression	CellMiner	-	-	-	-	-0.444604	0.0290408	-0.495037	0.00616288
crotoxin cd	miRNA	hsa-mir-200c	Expression	CellMiner	-	-	-	-	-0.609608	2.03112e-05	-0.595359	5.56982e-05
epoxypiperazine	miRNA	hsa-mir-200c	Expression	CellMiner	-	-	-	-	-	-	-0.425967	0.0315595
from combretum caffrum plant	miRNA	hsa-mir-200c	Expression	CellMiner	-	-	-	-	-	-	-0.437022	0.0306708
gw827099x	miRNA	hsa-mir-200c	Expression	CellMiner	-	-	-	-	0.445059	0.0449177	0.459655	0.0276601
Melphalan	miRNA	hsa-mir-200c	Expression	CellMiner	-	-	-	-	-	-	-0.366035	0.0389084
mitoclomine	miRNA	hsa-mir-200c	Expression	CellMiner	-	-	-	-	-0.347125	0.0342237	-0.345226	0.0449441
naphth[2,3-d]oxazol-9-one, 2-methyl-4-(phenylimino)-	miRNA	hsa-mir-200c	Expression	CellMiner	-	-	-	-	-0.509186	0.00472376	-0.479931	0.0166391
naphtho[2,3-b]furan-4,9-dione, 2-bromo-	miRNA	hsa-mir-200c	Expression	CellMiner	-	-	-	-	-0.516091	0.00570075	-0.454958	0.0451936
naphtho[2,3-d]thiazole-4,9-dione, 3-methyl-2-(methylimino)-	miRNA	hsa-mir-200c	Expression	CellMiner	-	-	-	-	-0.471612	0.0333551	-0.493895	0.0193475
new fuchsin	miRNA	hsa-mir-200c	Expression	CellMiner	-	-	-	-	-	-	-0.476161	0.0127915
PCNU	miRNA	hsa-mir-200c	Expression	CellMiner	-	-	-	-	-0.455212	0.0211668	-0.518219	0.00354835
PD-0332991	miRNA	hsa-miR-200c	Expression	CCLE	-	-	-	-	0.185541	0.0360963	-	-
PLX4720	miRNA	hsa-miR-200c	Expression	CCLE	-	-	-	-	-	-	0.216533	0.0120746
protein toxin a 23 - mw approx. 6700	miRNA	hsa-mir-200c	Expression	CellMiner	-	-	-	-	-0.515848	0.00191992	-0.511599	0.0045323
protein toxin b 15 - mw approx 6700	miRNA	hsa-mir-200c	Expression	CellMiner	-	-	-	-	-0.462736	0.0230673	-0.461766	0.0243773
protein toxin c 10 - mw approx. 6700	miRNA	hsa-mir-200c	Expression	CellMiner	-	-	-	-	-0.531041	0.000594517	-0.528662	0.00164489
protein toxin d 5 - mw approx 6700	miRNA	hsa-mir-200c	Expression	CellMiner	-	-	-	-	-0.448198	0.0256747	-0.494898	0.00464772
ptilomycalin a format salt	miRNA	hsa-mir-200c	Expression	CellMiner	-	-	-	-	-0.372015	0.0233052	-0.41628	0.0207797
resorufin	miRNA	hsa-mir-200c	Expression	CellMiner	-	-	-	-	-	-	-0.423839	0.0393066
sb-476429-a	miRNA	hsa-mir-200c	Expression	CellMiner	-	-	-	-	-0.386548	0.0485612	-	-
TKI258	miRNA	hsa-miR-200c	Expression	CCLE	-	-	-	-	0.192332	0.0287099	0.185637	0.0204831
toxin .delta.53l	miRNA	hsa-mir-200c	Expression	CellMiner	-	-	-	-	0.372555	0.035889	-	-
tp4ek	miRNA	hsa-mir-200c	Expression	CellMiner	-	-	-	-	0.405616	0.0160532	-	-
triciribine	miRNA	hsa-mir-200c	Expression	CellMiner	-	-	-	-	-	-	0.424735	0.0381949
trihydroxy-azatoxin	miRNA	hsa-mir-200c	Expression	CellMiner	-	-	-	-	-0.421623	0.037133	-	-
Uracil mustard	miRNA	hsa-mir-200c	Expression	CellMiner	-	-	-	-	-	-	-0.400224	0.0476741
ww-h1	miRNA	hsa-mir-200c	Expression	CellMiner	-	-	-	-	-0.427041	0.0141884	-0.388771	0.032538

## Sheet: MALAT1
the relationship between MALAT1 and drug sensitivity
Compound	RNAtype	RNAmolecule	Omics	Source	T.stat	T.fdr	Chi.stat	Chi.fdr	Pearson.stat	Pearson.fdr	Spearman.stat	Spearman.fdr	Details
(5Z)-7-Oxozeaenol	lncRNA	MALAT1	Expression	GDSC	-	-	-	-	0.102009	0.0155184	-	-
1,2-hydroxy-3-naphthoic acid	lncRNA	MALAT1	Expression	CellMiner	-	-	-	-	-0.415292	0.0287608	-	-
1-piperidineethanol, .alpha.-[p-(p-chlorostyryl)phenyl]-	lncRNA	MALAT1	Expression	CellMiner	-	-	-	-	-	-	-0.430689	0.0439876
2-(4-amino-3-methylphenyl)-5,6-difluorobenzothiazole	lncRNA	MALAT1	Expression	CellMiner	-	-	-	-	0.412201	0.0306959	-	-
25-dihydrosaframycin a	lncRNA	MALAT1	Methylation	CellMiner	-	-	-	-	-	-	-0.435389	0.00953592
5-Fluorouracil	lncRNA	MALAT1	CNV	GDSC	-	-	-	-	0.116372	0.000833095	0.118556	0.000690894
5-Fluorouracil	lncRNA	MALAT1	Expression	GDSC	-	-	-	-	0.101678	0.00348306	0.079858	0.0236238
[co(me2dtc)2(dee)]clo4	lncRNA	MALAT1	Methylation	CellMiner	-	-	-	-	-	-	-0.447161	0.0163382
AC1L8IIM	lncRNA	MALAT1	Methylation	CellMiner	-	-	-	-	0.45578	0.0198346	0.471238	0.00972484
Afatinib	lncRNA	MALAT1	CNV	GDSC	-	-	-	-	-0.099081	0.0306242	-	-
Afatinib	lncRNA	MALAT1	Methylation	GDSC	-	-	-	-	-0.277529	8.43791e-16	-0.253548	4.61014e-13
AICA Ribonucleotide	lncRNA	MALAT1	Expression	GDSC	-	-	-	-	0.121904	0.000827343	0.113116	0.00237072
AKT inhibitor VIII	lncRNA	MALAT1	CNV	GDSC	-	-	-	-	0.0862614	0.0290555	0.102984	0.0059523
AKT inhibitor VIII	lncRNA	MALAT1	Expression	GDSC	-	-	-	-	0.0756071	0.0370735	-	-
Alectinib	lncRNA	MALAT1	Expression	GDSC	-	-	-	-	0.104834	0.00434616	0.126538	0.000396701
Amuvatinib	lncRNA	MALAT1	CNV	GDSC	-	-	-	-	0.0979028	0.0260488	0.131304	0.000678629
Amuvatinib	lncRNA	MALAT1	Expression	GDSC	-	-	-	-	0.0835748	0.0167706	0.108518	0.00148802
Amuvatinib	lncRNA	MALAT1	Methylation	GDSC	-	-	-	-	0.109204	0.00526714	0.129678	0.000622245
AR-42	lncRNA	MALAT1	CNV	GDSC	-	-	-	-	0.0884909	0.0235093	0.123004	0.000764831
AR-42	lncRNA	MALAT1	Expression	GDSC	-	-	-	-	0.0881675	0.0152899	0.0991936	0.00504855
AR-42	lncRNA	MALAT1	Methylation	GDSC	-	-	-	-	0.1207	0.0015517	0.129208	0.000594461
arborescidine d	lncRNA	MALAT1	Expression	CellMiner	-	-	-	-	-0.501705	0.0156907	-	-
at 116, benzylamine salt	lncRNA	MALAT1	Methylation	CellMiner	-	-	-	-	-	-	-0.338493	0.0343148
AT-7519	lncRNA	MALAT1	Expression	GDSC	-	-	-	-	0.100318	0.00535786	0.0829949	0.021466
austocystin d	lncRNA	MALAT1	Methylation	CellMiner	-	-	-	-	0.438005	0.0115326	0.527406	0.00121597
Avagacestat	lncRNA	MALAT1	Expression	GDSC	-	-	-	-	0.11628	0.0029047	0.126901	0.00111217
Axitinib	lncRNA	MALAT1	CNV	GDSC	-	-	-	-	0.125705	0.000669847	0.145046	8.88318e-05
Axitinib	lncRNA	MALAT1	Expression	GDSC	-	-	-	-	0.173715	2.06028e-06	0.163807	1.45279e-05
Axitinib	lncRNA	MALAT1	Methylation	GDSC	-	-	-	-	0.121913	0.00162191	0.0977972	0.013241
AZD7762	lncRNA	MALAT1	CNV	GDSC	-	-	-	-	0.118081	0.000752554	0.136824	0.000120026
AZD7762	lncRNA	MALAT1	Expression	GDSC	-	-	-	-	0.218903	5.2819e-10	0.22061	6.92085e-10
AZD8055	lncRNA	MALAT1	CNV	GDSC	-	-	-	-	0.105387	0.00287676	0.112716	0.00185107
AZD8055	lncRNA	MALAT1	Expression	GDSC	-	-	-	-	0.133222	0.000336641	0.109352	0.00349962
Basic Fuchsin	lncRNA	MALAT1	Methylation	CellMiner	-	-	-	-	-	-	-0.35209	0.0289054
BAY-61-3606	lncRNA	MALAT1	CNV	GDSC	-	-	-	-	0.1042	0.00282146	0.114277	0.00114426
BAY-61-3606	lncRNA	MALAT1	Expression	GDSC	-	-	-	-	0.0951433	0.0131643	0.101624	0.00824424
Belinostat	lncRNA	MALAT1	CNV	GDSC	-	-	-	-	-	-	0.0899612	0.0172309
Belinostat	lncRNA	MALAT1	Expression	GDSC	-	-	-	-	-	-	0.0820503	0.0229319
Belinostat	lncRNA	MALAT1	Methylation	GDSC	-	-	-	-	0.0921829	0.0214661	0.0874421	0.0302738
Bicalutamide	lncRNA	MALAT1	Expression	GDSC	-	-	-	-	0.147493	7.19884e-05	0.15152	3.8588e-05
Bicalutamide	lncRNA	MALAT1	Methylation	GDSC	-	-	-	-	0.0894536	0.043437	0.0927875	0.0302406
BIX02189	lncRNA	MALAT1	CNV	GDSC	-	-	-	-	0.138134	6.35174e-05	0.13776	6.1713e-05
BIX02189	lncRNA	MALAT1	Expression	GDSC	-	-	-	-	0.188709	3.32972e-08	0.182954	1.38694e-07
BIX02189	lncRNA	MALAT1	Methylation	GDSC	-	-	-	-	0.103149	0.00436896	0.107471	0.00309143
Bleomycin (50 uM)	lncRNA	MALAT1	Methylation	GDSC	-	-	-	-	-0.0992421	0.0132396	-0.0926199	0.0199012
BMS-345541	lncRNA	MALAT1	CNV	GDSC	-	-	-	-	0.073288	0.0466964	0.112494	0.00128531
BMS-345541	lncRNA	MALAT1	Expression	GDSC	-	-	-	-	0.153474	8.28949e-06	0.14403	2.7842e-05
BMS-345541	lncRNA	MALAT1	Methylation	GDSC	-	-	-	-	-	-	0.102824	0.00633484
Bosutinib	lncRNA	MALAT1	Expression	GDSC	-	-	-	-	0.106612	0.00763282	0.111473	0.0109924
Bryostatin 1	lncRNA	MALAT1	Expression	GDSC	-	-	-	-	0.11884	0.0277442	0.110374	0.0249293
BX-912	lncRNA	MALAT1	CNV	GDSC	-	-	-	-	0.124853	0.000489829	0.142643	5.02245e-05
BX-912	lncRNA	MALAT1	Expression	GDSC	-	-	-	-	0.162754	2.78152e-06	0.123967	0.000520567
BX-912	lncRNA	MALAT1	Methylation	GDSC	-	-	-	-	0.134895	0.000147366	0.156795	1.09533e-05
BX795	lncRNA	MALAT1	CNV	GDSC	-	-	-	-	-	-	0.0816785	0.0383791
BX795	lncRNA	MALAT1	Expression	GDSC	-	-	-	-	0.159067	3.20364e-05	0.146678	0.000213683
BX795	lncRNA	MALAT1	Methylation	GDSC	-	-	-	-	-	-	0.0964102	0.0204504
Cabozantinib	lncRNA	MALAT1	CNV	GDSC	-	-	-	-	0.0823471	0.0217335	0.0761958	0.0419063
Cabozantinib	lncRNA	MALAT1	Expression	GDSC	-	-	-	-	0.108541	0.00543505	0.0887125	0.0323569
CAY10603	lncRNA	MALAT1	CNV	GDSC	-	-	-	-	0.0920286	0.0175829	0.126897	0.000397248
CAY10603	lncRNA	MALAT1	Expression	GDSC	-	-	-	-	0.0771345	0.0337611	0.100866	0.00441592
CAY10603	lncRNA	MALAT1	Methylation	GDSC	-	-	-	-	0.135157	0.000308436	0.141331	0.000140321
CCT-018159	lncRNA	MALAT1	Expression	GDSC	-	-	-	-	0.12564	0.00593616	0.13065	0.00305976
CCT007093	lncRNA	MALAT1	Expression	GDSC	-	-	-	-	-	-	0.0864187	0.0326464
Cetuximab	lncRNA	MALAT1	Methylation	GDSC	-	-	-	-	-0.221391	1.74731e-09	-0.175994	5.63037e-06
CHIR-99021	lncRNA	MALAT1	Expression	GDSC	-	-	-	-	0.143343	0.000353333	0.140377	0.000400713
CI-1040	lncRNA	MALAT1	Methylation	GDSC	-	-	-	-	-	-	-0.083408	0.0468219
cis-dichlorobis(4-methoxyphenethylamine)platinum(ii)	lncRNA	MALAT1	Methylation	CellMiner	-	-	-	-	-	-	-0.38739	0.0299896
Cisplatin	lncRNA	MALAT1	CNV	GDSC	-	-	-	-	-	-	0.0863054	0.0254095
Cisplatin	lncRNA	MALAT1	Expression	GDSC	-	-	-	-	0.171737	1.16277e-05	0.191256	3.17539e-07
Cisplatin	lncRNA	MALAT1	Methylation	GDSC	-	-	-	-	-	-	0.0890363	0.0496533
Cobimetinib (isomer 1)	lncRNA	MALAT1	Expression	CellMiner	-	-	-	-	-0.497012	0.00681751	-0.483364	0.00815232
copper(ii) ocetanedioate 1,10-phenanthroline perchlorate	lncRNA	MALAT1	Methylation	CellMiner	-	-	-	-	-	-	0.496373	0.00862679
CP466722	lncRNA	MALAT1	CNV	GDSC	-	-	-	-	0.0997565	0.00563825	0.122424	0.000546679
CP466722	lncRNA	MALAT1	Expression	GDSC	-	-	-	-	0.11887	0.000921362	0.12543	0.000525983
CP466722	lncRNA	MALAT1	Methylation	GDSC	-	-	-	-	0.104493	0.00444562	0.128939	0.000424212
CUDC-101	lncRNA	MALAT1	CNV	GDSC	-	-	-	-	-	-	0.0768549	0.0408098
CUDC-101	lncRNA	MALAT1	Expression	GDSC	-	-	-	-	-	-	0.0796374	0.0310227
CX-5461	lncRNA	MALAT1	CNV	GDSC	-	-	-	-	0.12959	0.000198285	0.133483	0.000109548
CX-5461	lncRNA	MALAT1	Expression	GDSC	-	-	-	-	0.102288	0.00445987	0.0795261	0.0262696
CX-5461	lncRNA	MALAT1	Methylation	GDSC	-	-	-	-	0.12442	0.000702702	0.113457	0.00245061
Cytarabine	lncRNA	MALAT1	Expression	GDSC	-	-	-	-	0.136321	0.000572968	0.116235	0.00539195
Dabrafenib	lncRNA	MALAT1	CNV	GDSC	-	-	-	-	-	-	0.0814987	0.0342077
Dabrafenib	lncRNA	MALAT1	Expression	GDSC	-	-	-	-	0.128822	0.00131026	0.104363	0.0145912
Dactolisib	lncRNA	MALAT1	Expression	GDSC	-	-	-	-	0.109968	0.0157345	-	-
Daporinad	lncRNA	MALAT1	CNV	GDSC	-	-	-	-	0.146201	2.47459e-05	0.164555	1.33221e-06
Daporinad	lncRNA	MALAT1	Expression	GDSC	-	-	-	-	0.11816	0.000913014	0.127285	0.000314342
Daporinad	lncRNA	MALAT1	Methylation	GDSC	-	-	-	-	0.13757	0.000201198	0.145662	6.50019e-05
DMOG	lncRNA	MALAT1	Expression	GDSC	-	-	-	-	0.112616	0.00726024	0.109079	0.0108269
EHT-1864	lncRNA	MALAT1	Expression	GDSC	-	-	-	-	0.106131	0.00463702	0.0945367	0.00964423
Enzastaurin	lncRNA	MALAT1	Expression	GDSC	-	-	-	-	0.093457	0.0196149	0.0869408	0.0335979
Epothilone B	lncRNA	MALAT1	Methylation	GDSC	-	-	-	-	-0.107903	0.0242523	-0.105203	0.0481931
Etoposide	lncRNA	MALAT1	CNV	GDSC	-	-	-	-	-	-	0.0856263	0.0245262
Fedratinib	lncRNA	MALAT1	CNV	GDSC	-	-	-	-	0.0934676	0.00974981	0.103708	0.00459149
Fedratinib	lncRNA	MALAT1	Expression	GDSC	-	-	-	-	0.140502	7.92027e-05	0.130353	0.000318292
Fedratinib	lncRNA	MALAT1	Methylation	GDSC	-	-	-	-	0.0847028	0.0228699	0.110948	0.00220718
Foretinib	lncRNA	MALAT1	CNV	GDSC	-	-	-	-	0.101374	0.00315017	0.101898	0.00489501
Foretinib	lncRNA	MALAT1	Expression	GDSC	-	-	-	-	0.110555	0.00735972	0.098436	0.0248164
Foretinib	lncRNA	MALAT1	Methylation	GDSC	-	-	-	-	-	-	0.0839884	0.0343888
FR-180204	lncRNA	MALAT1	CNV	GDSC	-	-	-	-	0.0798096	0.0335801	-	-
FR-180204	lncRNA	MALAT1	Expression	GDSC	-	-	-	-	0.122499	0.000679523	0.106488	0.0041302
Gefitinib	lncRNA	MALAT1	Methylation	GDSC	-	-	-	-	-0.206993	1.18449e-08	-0.176314	5.32991e-06
Gemcitabine	lncRNA	MALAT1	CNV	GDSC	-	-	-	-	-	-	0.0845219	0.0215314
Gemcitabine	lncRNA	MALAT1	Expression	GDSC	-	-	-	-	0.0963727	0.0316237	0.111061	0.00864328
Genentech Cpd 10	lncRNA	MALAT1	CNV	GDSC	-	-	-	-	0.104908	0.00397012	0.125736	0.000430875
Genentech Cpd 10	lncRNA	MALAT1	Expression	GDSC	-	-	-	-	0.120485	0.000872437	0.107318	0.00363781
Genentech Cpd 10	lncRNA	MALAT1	Methylation	GDSC	-	-	-	-	0.110736	0.00314417	0.108276	0.004209
GSK1070916	lncRNA	MALAT1	CNV	GDSC	-	-	-	-	0.134188	0.000158919	0.143455	3.31965e-05
GSK1070916	lncRNA	MALAT1	Expression	GDSC	-	-	-	-	0.151621	1.28622e-05	0.110752	0.00183687
GSK1070916	lncRNA	MALAT1	Methylation	GDSC	-	-	-	-	0.105507	0.00354418	0.113357	0.00214348
GSK269962A	lncRNA	MALAT1	CNV	GDSC	-	-	-	-	-	-	0.087826	0.039129
GSK269962A	lncRNA	MALAT1	Expression	GDSC	-	-	-	-	0.107536	0.00861312	0.12436	0.00227979
GSK269962A	lncRNA	MALAT1	Methylation	GDSC	-	-	-	-	0.121241	0.00201426	0.106019	0.00803906
GSK429286A	lncRNA	MALAT1	CNV	GDSC	-	-	-	-	0.113369	0.00230151	0.13848	8.46873e-05
GSK429286A	lncRNA	MALAT1	Expression	GDSC	-	-	-	-	0.158102	6.23018e-06	0.143847	4.62976e-05
GSK429286A	lncRNA	MALAT1	Methylation	GDSC	-	-	-	-	0.139799	0.000106248	0.149145	3.58132e-05
GSK690693	lncRNA	MALAT1	CNV	GDSC	-	-	-	-	-	-	0.109304	0.00208016
GSK690693	lncRNA	MALAT1	Expression	GDSC	-	-	-	-	0.0923742	0.00928764	-	-
GSK690693	lncRNA	MALAT1	Methylation	GDSC	-	-	-	-	0.088353	0.0162623	0.0764856	0.0454209
GW-2580	lncRNA	MALAT1	CNV	GDSC	-	-	-	-	0.0820197	0.0412344	0.0962115	0.0109329
GW-2580	lncRNA	MALAT1	Expression	GDSC	-	-	-	-	0.148875	3.90185e-05	0.156283	1.22601e-05
GW441756	lncRNA	MALAT1	Expression	GDSC	-	-	-	-	0.116217	0.0380452	-	-
gw768505a	lncRNA	MALAT1	Methylation	CellMiner	-	-	-	-	0.408536	0.0432155	-	-
I-BET-762	lncRNA	MALAT1	CNV	GDSC	-	-	-	-	0.107974	0.00303329	0.113999	0.0014974
I-BET-762	lncRNA	MALAT1	Expression	GDSC	-	-	-	-	0.134699	9.42097e-05	0.109335	0.00171742
I-BET-762	lncRNA	MALAT1	Methylation	GDSC	-	-	-	-	0.145147	4.41959e-05	0.167309	2.99987e-06
Idelalisib	lncRNA	MALAT1	CNV	GDSC	-	-	-	-	0.0904981	0.0156396	0.0946129	0.0088734
Idelalisib	lncRNA	MALAT1	Expression	GDSC	-	-	-	-	0.127519	0.000300576	0.121848	0.000792712
IOX2	lncRNA	MALAT1	Expression	GDSC	-	-	-	-	-	-	0.0804288	0.0470773
IPA-3	lncRNA	MALAT1	CNV	GDSC	-	-	-	-	-	-	0.0799603	0.0360049
IPA-3	lncRNA	MALAT1	Expression	GDSC	-	-	-	-	0.087842	0.0214535	0.0842825	0.0297506
Ispinesib Mesylate	lncRNA	MALAT1	CNV	GDSC	-	-	-	-	0.0987676	0.00385434	0.119108	0.00040605
Ispinesib Mesylate	lncRNA	MALAT1	Expression	GDSC	-	-	-	-	0.079199	0.0288352	-	-
Ispinesib Mesylate	lncRNA	MALAT1	Methylation	GDSC	-	-	-	-	-	-	0.0815096	0.0415738
janus red	lncRNA	MALAT1	Methylation	CellMiner	-	-	-	-	-	-	-0.373135	0.0343691
JNK Inhibitor VIII	lncRNA	MALAT1	Expression	GDSC	-	-	-	-	0.144351	0.000915411	0.165728	3.1656e-05
JQ1	lncRNA	MALAT1	Expression	GDSC	-	-	-	-	0.108246	0.00329649	0.0981104	0.0104546
JQ12	lncRNA	MALAT1	Expression	GDSC	-	-	-	-	0.097846	0.0145768	0.0956007	0.0202335
JW-7-24-1	lncRNA	MALAT1	CNV	GDSC	-	-	-	-	0.0868955	0.0199401	0.0985977	0.00960389
JW-7-24-1	lncRNA	MALAT1	Expression	GDSC	-	-	-	-	0.124353	0.00055952	0.126355	0.00044754
JW-7-24-1	lncRNA	MALAT1	Methylation	GDSC	-	-	-	-	0.110852	0.00223954	0.126933	0.0005107
KIN001-236	lncRNA	MALAT1	CNV	GDSC	-	-	-	-	0.124682	0.000617749	0.12224	0.000720244
KIN001-236	lncRNA	MALAT1	Expression	GDSC	-	-	-	-	0.160135	2.99757e-06	0.146535	2.61893e-05
KIN001-236	lncRNA	MALAT1	Methylation	GDSC	-	-	-	-	0.156096	1.01368e-05	0.152089	2.69145e-05
KIN001-244	lncRNA	MALAT1	CNV	GDSC	-	-	-	-	0.118507	0.000715682	0.126822	0.000317905
KIN001-244	lncRNA	MALAT1	Expression	GDSC	-	-	-	-	0.125048	0.000376608	0.107595	0.00249476
KIN001-244	lncRNA	MALAT1	Methylation	GDSC	-	-	-	-	0.109019	0.00358313	0.114356	0.00322008
KIN001-260	lncRNA	MALAT1	CNV	GDSC	-	-	-	-	0.159323	5.40032e-06	0.168217	1.00902e-06
KIN001-260	lncRNA	MALAT1	Expression	GDSC	-	-	-	-	0.186161	3.44971e-08	0.184092	6.86432e-08
KIN001-260	lncRNA	MALAT1	Methylation	GDSC	-	-	-	-	0.148421	3.05279e-05	0.153089	2.20345e-05
KIN001-266	lncRNA	MALAT1	Expression	GDSC	-	-	-	-	0.0787073	0.0396394	0.0943474	0.0111554
KIN001-266	lncRNA	MALAT1	Methylation	GDSC	-	-	-	-	0.0897014	0.0342967	0.102649	0.0119781
KIN001-270	lncRNA	MALAT1	CNV	GDSC	-	-	-	-	0.109728	0.00240298	0.112131	0.00152034
KIN001-270	lncRNA	MALAT1	Expression	GDSC	-	-	-	-	0.134833	9.76483e-05	0.114483	0.000929162
KIN001-270	lncRNA	MALAT1	Methylation	GDSC	-	-	-	-	0.153469	1.91646e-05	0.148273	5.5881e-05
KU-55933	lncRNA	MALAT1	CNV	GDSC	-	-	-	-	-	-	0.0858029	0.0235326
KU-55933	lncRNA	MALAT1	Expression	GDSC	-	-	-	-	0.162523	6.86011e-06	0.127486	0.000848975
L-685458	lncRNA	MALAT1	Mutation	CCLE	5.01436	5.18717e-05	-	-	-	-	-	-
Lenalidomide	lncRNA	MALAT1	CNV	GDSC	-	-	-	-	0.0961267	0.0086236	0.109418	0.00403019
Lenalidomide	lncRNA	MALAT1	Expression	GDSC	-	-	-	-	0.186086	8.74594e-08	0.184759	1.81846e-07
Lestaurtinib	lncRNA	MALAT1	CNV	GDSC	-	-	-	-	0.135727	0.000108522	0.144696	5.11237e-05
Lestaurtinib	lncRNA	MALAT1	Expression	GDSC	-	-	-	-	0.204546	1.14796e-08	0.196712	1.0886e-07
Lestaurtinib	lncRNA	MALAT1	Methylation	GDSC	-	-	-	-	-	-	0.0850741	0.0344857
Linifanib	lncRNA	MALAT1	CNV	GDSC	-	-	-	-	0.0952962	0.00863724	-	-
Linifanib	lncRNA	MALAT1	Expression	GDSC	-	-	-	-	0.163388	5.95169e-06	0.146663	5.35338e-05
Linifanib	lncRNA	MALAT1	Methylation	GDSC	-	-	-	-	-	-	0.104229	0.0101674
Masitinib	lncRNA	MALAT1	CNV	GDSC	-	-	-	-	0.129882	0.000258994	0.137844	0.00011506
Masitinib	lncRNA	MALAT1	Expression	GDSC	-	-	-	-	0.14374	5.00286e-05	0.162728	3.47149e-06
Masitinib	lncRNA	MALAT1	Methylation	GDSC	-	-	-	-	0.184574	2.31471e-07	0.185539	2.33597e-07
mercury, chloro-2-naphthalenyl-	lncRNA	MALAT1	Methylation	CellMiner	-	-	-	-	-0.446642	0.0408892	-0.37699	0.0485057
Methotrexate	lncRNA	MALAT1	CNV	GDSC	-	-	-	-	0.115871	0.000989021	0.0999399	0.00555473
Methotrexate	lncRNA	MALAT1	Expression	GDSC	-	-	-	-	0.190824	2.36942e-08	0.161681	3.75125e-06
Midostaurin	lncRNA	MALAT1	Expression	GDSC	-	-	-	-	0.101517	0.0247998	0.0990829	0.0319172
Mitomycin-C	lncRNA	MALAT1	CNV	GDSC	-	-	-	-	-	-	0.0785727	0.0305498
MK-2206	lncRNA	MALAT1	Expression	GDSC	-	-	-	-	0.101643	0.027402	-	-
Motesanib	lncRNA	MALAT1	Expression	GDSC	-	-	-	-	0.152699	0.000261602	0.161211	6.67342e-05
MPS-1-IN-1	lncRNA	MALAT1	Expression	GDSC	-	-	-	-	0.109325	0.00222625	0.114421	0.00123166
MPS-1-IN-1	lncRNA	MALAT1	Methylation	GDSC	-	-	-	-	0.0913272	0.0207394	0.0883207	0.026495
n6-benzyladenosine-5'-phosphate	lncRNA	MALAT1	Expression	CellMiner	-	-	-	-	0.436764	0.0205727	-	-
Navitoclax	lncRNA	MALAT1	CNV	GDSC	-	-	-	-	0.131861	0.000130369	0.129511	0.000152559
Navitoclax	lncRNA	MALAT1	Expression	GDSC	-	-	-	-	0.116809	0.00101275	0.0940273	0.0121956
Navitoclax	lncRNA	MALAT1	Methylation	GDSC	-	-	-	-	0.120773	0.000787023	0.117062	0.00152761
NG-25	lncRNA	MALAT1	CNV	GDSC	-	-	-	-	0.147774	1.50059e-05	0.160202	3.65933e-06
NG-25	lncRNA	MALAT1	Expression	GDSC	-	-	-	-	0.123646	0.000477997	0.120242	0.000724875
NG-25	lncRNA	MALAT1	Methylation	GDSC	-	-	-	-	0.127075	0.000448268	0.127421	0.000551654
NPK76-II-72-1	lncRNA	MALAT1	CNV	GDSC	-	-	-	-	0.120822	0.000617559	0.120365	0.000530658
NPK76-II-72-1	lncRNA	MALAT1	Expression	GDSC	-	-	-	-	0.137136	7.75335e-05	0.11478	0.000996919
NPK76-II-72-1	lncRNA	MALAT1	Methylation	GDSC	-	-	-	-	0.143906	6.01611e-05	0.148777	3.32457e-05
NSC-207895	lncRNA	MALAT1	CNV	GDSC	-	-	-	-	0.0742398	0.0444786	0.0836943	0.0234609
NSC-207895	lncRNA	MALAT1	Expression	GDSC	-	-	-	-	0.0983035	0.00990171	0.0836421	0.0276714
NSC-87877	lncRNA	MALAT1	Expression	GDSC	-	-	-	-	-	-	0.124137	0.00129679
NU7441	lncRNA	MALAT1	CNV	GDSC	-	-	-	-	0.0729845	0.0474164	0.0896641	0.0169693
NU7441	lncRNA	MALAT1	Expression	GDSC	-	-	-	-	0.177747	2.01802e-06	0.156377	0.000144952
Nutlin-3	lncRNA	MALAT1	Mutation	CCLE	3.9127	0.000195931	-	-	-	-	-	-
Nutlin-3a (-)	lncRNA	MALAT1	CNV	GDSC	-	-	-	-	0.18187	1.19326e-07	0.181572	1.15573e-07
Nutlin-3a (-)	lncRNA	MALAT1	Expression	GDSC	-	-	-	-	0.089704	0.017059	0.0788296	0.035284
Nutlin-3a (-)	lncRNA	MALAT1	Methylation	GDSC	-	-	-	-	0.0916486	0.0225021	0.098242	0.0163663
NVP-BHG712	lncRNA	MALAT1	CNV	GDSC	-	-	-	-	0.129762	0.000271482	0.136115	0.000159695
NVP-BHG712	lncRNA	MALAT1	Expression	GDSC	-	-	-	-	0.119859	0.00061245	0.114713	0.00113044
NVP-BHG712	lncRNA	MALAT1	Methylation	GDSC	-	-	-	-	0.123344	0.000690002	0.10542	0.00523419
Olaparib	lncRNA	MALAT1	CNV	GDSC	-	-	-	-	0.0896558	0.0159304	0.0892317	0.0139255
Olaparib	lncRNA	MALAT1	Expression	GDSC	-	-	-	-	0.122387	0.00185363	0.136859	0.000438269
Olaparib	lncRNA	MALAT1	Methylation	GDSC	-	-	-	-	0.110314	0.00780717	0.0979436	0.0224762
OSI-027	lncRNA	MALAT1	CNV	GDSC	-	-	-	-	0.0932813	0.0144211	0.10881	0.00323549
OSI-027	lncRNA	MALAT1	Expression	GDSC	-	-	-	-	0.103585	0.00418868	0.0933013	0.00973801
OSI-027	lncRNA	MALAT1	Methylation	GDSC	-	-	-	-	0.0947582	0.0108773	0.0963344	0.00911251
OSI-930	lncRNA	MALAT1	CNV	GDSC	-	-	-	-	0.087535	0.022722	0.0830322	0.0315932
OSI-930	lncRNA	MALAT1	Expression	GDSC	-	-	-	-	0.133139	0.000107936	0.110695	0.00144202
OSI-930	lncRNA	MALAT1	Methylation	GDSC	-	-	-	-	0.148376	3.56457e-05	0.17355	1.55099e-06
p-fuchsin	lncRNA	MALAT1	Methylation	CellMiner	-	-	-	-	-	-	-0.376808	0.0130907
PAC-1	lncRNA	MALAT1	Expression	GDSC	-	-	-	-	0.152724	2.00479e-05	0.141349	8.71975e-05
Palbociclib	lncRNA	MALAT1	Expression	GDSC	-	-	-	-	0.0972319	0.0206218	-	-
Panobinostat	lncRNA	MALAT1	CNV	CCLE	-	-	-	-	-	-	0.228208	0.00159681
Panobinostat	lncRNA	MALAT1	Methylation	CCLE	-	-	-	-	0.208786	0.0110805	0.228407	0.00494998
Pazopanib	lncRNA	MALAT1	Methylation	GDSC	-	-	-	-	0.0975014	0.0472056	-	-
PD0325901	lncRNA	MALAT1	Methylation	GDSC	-	-	-	-	-0.118578	0.00175432	-0.159061	1.47116e-05
PD173074	lncRNA	MALAT1	CNV	GDSC	-	-	-	-	-	-	0.0958249	0.0178187
PD173074	lncRNA	MALAT1	Expression	GDSC	-	-	-	-	0.129008	0.000695286	0.125598	0.00107639
PD173074	lncRNA	MALAT1	Methylation	GDSC	-	-	-	-	-	-	0.0825474	0.0418608
Pelitinib	lncRNA	MALAT1	Methylation	GDSC	-	-	-	-	-0.102317	0.00654505	-0.102644	0.00562393
PF-4708671	lncRNA	MALAT1	Expression	GDSC	-	-	-	-	0.0818475	0.043379	0.0812618	0.0451915
PFI-1	lncRNA	MALAT1	Expression	GDSC	-	-	-	-	0.0947076	0.0249183	0.0898385	0.0399909
PFI-3	lncRNA	MALAT1	CNV	GDSC	-	-	-	-	0.0816489	0.025729	0.0912297	0.0153255
PFI-3	lncRNA	MALAT1	Expression	GDSC	-	-	-	-	0.13105	0.00025468	0.156973	8.24377e-06
PHA-793887	lncRNA	MALAT1	CNV	GDSC	-	-	-	-	0.0803338	0.0218421	0.0782665	0.0255682
PHA-793887	lncRNA	MALAT1	Expression	GDSC	-	-	-	-	0.111166	0.0015598	0.0860664	0.0137953
Phenformin	lncRNA	MALAT1	Expression	GDSC	-	-	-	-	0.118555	0.0009904	0.110387	0.00201834
Phenformin	lncRNA	MALAT1	Methylation	GDSC	-	-	-	-	0.107929	0.00483688	0.133257	0.000396136
PI-103	lncRNA	MALAT1	Methylation	GDSC	-	-	-	-	0.103092	0.00537098	0.11096	0.00246672
PIK-93	lncRNA	MALAT1	CNV	GDSC	-	-	-	-	0.0970483	0.00966176	0.0967367	0.00858328
PIK-93	lncRNA	MALAT1	Expression	GDSC	-	-	-	-	0.149684	1.65784e-05	0.132519	0.000198515
PIK-93	lncRNA	MALAT1	Methylation	GDSC	-	-	-	-	0.116279	0.00133199	0.124936	0.000779904
Piperlongumine	lncRNA	MALAT1	Expression	GDSC	-	-	-	-	-	-	0.116286	0.00771534
PLX-4720	lncRNA	MALAT1	CNV	GDSC	-	-	-	-	-	-	0.0949642	0.014181
PLX-4720	lncRNA	MALAT1	Expression	GDSC	-	-	-	-	0.182537	1.69135e-06	0.169974	5.13794e-06
PLX-4720	lncRNA	MALAT1	Methylation	GDSC	-	-	-	-	0.101125	0.0075812	0.0796462	0.0475354
Ponatinib	lncRNA	MALAT1	CNV	GDSC	-	-	-	-	0.0944351	0.0130878	-	-
Ponatinib	lncRNA	MALAT1	Expression	GDSC	-	-	-	-	0.146993	6.2036e-05	0.153053	0.000167846
pyrazolanthrone	lncRNA	MALAT1	Methylation	CellMiner	-	-	-	-	0.470248	0.0235463	-	-
QL-X-138	lncRNA	MALAT1	CNV	GDSC	-	-	-	-	0.0784764	0.0418551	0.106817	0.00368858
QL-X-138	lncRNA	MALAT1	Methylation	GDSC	-	-	-	-	0.117016	0.00128299	0.12285	0.000817447
QL-XI-92	lncRNA	MALAT1	CNV	GDSC	-	-	-	-	0.124932	0.000419385	0.125368	0.000437614
QL-XI-92	lncRNA	MALAT1	Expression	GDSC	-	-	-	-	0.128912	0.000222	0.118429	0.000878133
QL-XI-92	lncRNA	MALAT1	Methylation	GDSC	-	-	-	-	0.161777	5.12931e-06	0.163336	6.49525e-06
QS11	lncRNA	MALAT1	Expression	GDSC	-	-	-	-	0.118797	0.00185924	0.116665	0.00179251
Quizartinib	lncRNA	MALAT1	CNV	GDSC	-	-	-	-	0.12764	0.000630969	0.128185	0.000447515
Quizartinib	lncRNA	MALAT1	Expression	GDSC	-	-	-	-	0.167871	1.502e-06	0.142389	4.44906e-05
Quizartinib	lncRNA	MALAT1	Methylation	GDSC	-	-	-	-	0.137679	0.000146874	0.211092	2.14949e-09
Refametinib	lncRNA	MALAT1	Methylation	GDSC	-	-	-	-	-0.126416	0.000549416	-0.15861	1.09063e-05
rhodium dimer	lncRNA	MALAT1	Methylation	CellMiner	-	-	-	-	-0.337828	0.0483621	-	-
rTRAIL	lncRNA	MALAT1	Expression	GDSC	-	-	-	-	0.128094	0.0079387	0.166243	1.26894e-05
Rucaparib	lncRNA	MALAT1	Methylation	GDSC	-	-	-	-	0.096409	0.042985	-	-
Ruxolitinib	lncRNA	MALAT1	CNV	GDSC	-	-	-	-	-	-	0.109966	0.00387083
Ruxolitinib	lncRNA	MALAT1	Expression	GDSC	-	-	-	-	0.159289	6.62505e-06	0.146847	3.12575e-05
Ruxolitinib	lncRNA	MALAT1	Methylation	GDSC	-	-	-	-	-	-	0.122888	0.00113219
sb-476429-a	lncRNA	MALAT1	Expression	CellMiner	-	-	-	-	-0.404705	0.0497417	-	-
SB505124	lncRNA	MALAT1	CNV	GDSC	-	-	-	-	0.106049	0.00339601	0.117161	0.00129149
SB505124	lncRNA	MALAT1	Expression	GDSC	-	-	-	-	0.087719	0.0236736	0.0798874	0.0367158
SB505124	lncRNA	MALAT1	Methylation	GDSC	-	-	-	-	0.111492	0.00655584	0.116243	0.00335847
SB52334	lncRNA	MALAT1	CNV	GDSC	-	-	-	-	0.0902514	0.0199614	0.0955238	0.0100662
SB52334	lncRNA	MALAT1	Methylation	GDSC	-	-	-	-	0.210646	8.44229e-09	0.21958	1.25902e-09
SB590885	lncRNA	MALAT1	Expression	GDSC	-	-	-	-	0.0977866	0.0208802	-	-
SB590885	lncRNA	MALAT1	Methylation	GDSC	-	-	-	-	0.109154	0.0057775	-	-
Selisistat	lncRNA	MALAT1	CNV	GDSC	-	-	-	-	-	-	0.0831737	0.0338932
Selisistat	lncRNA	MALAT1	Expression	GDSC	-	-	-	-	0.182476	1.42552e-07	0.16924	1.34448e-06
Selisistat	lncRNA	MALAT1	Methylation	GDSC	-	-	-	-	0.119998	0.00185527	0.127271	0.000783827
Selumetinib	lncRNA	MALAT1	Expression	CellMiner	-	-	-	-	-0.509974	0.00216582	-0.51731	0.00613591
Selumetinib	lncRNA	MALAT1	Methylation	GDSC	-	-	-	-	-0.0966896	0.0115015	-0.118181	0.00157235
SGC0946	lncRNA	MALAT1	Expression	GDSC	-	-	-	-	0.15127	1.80963e-05	0.158192	7.24112e-06
SL0101	lncRNA	MALAT1	Expression	GDSC	-	-	-	-	0.0982366	0.0155088	0.0837534	0.0360286
SN-38	lncRNA	MALAT1	CNV	GDSC	-	-	-	-	0.0877664	0.00961721	0.101194	0.00363414
SN-38	lncRNA	MALAT1	Expression	GDSC	-	-	-	-	0.130622	0.000885773	0.127351	0.00134885
SNX-2112	lncRNA	MALAT1	CNV	GDSC	-	-	-	-	0.0933535	0.00878148	0.109937	0.00156274
SNX-2112	lncRNA	MALAT1	Expression	GDSC	-	-	-	-	0.109405	0.0025407	0.114647	0.001519
SNX-2112	lncRNA	MALAT1	Methylation	GDSC	-	-	-	-	0.108792	0.00393256	0.113388	0.00263445
STF-62247	lncRNA	MALAT1	CNV	GDSC	-	-	-	-	0.102686	0.00592598	0.110605	0.00207465
STF-62247	lncRNA	MALAT1	Expression	GDSC	-	-	-	-	0.196669	7.55536e-09	0.18896	4.11298e-08
STF-62247	lncRNA	MALAT1	Methylation	GDSC	-	-	-	-	-	-	0.0802474	0.0391238
T0901317	lncRNA	MALAT1	CNV	GDSC	-	-	-	-	0.15687	5.09927e-06	0.152305	8.90189e-06
T0901317	lncRNA	MALAT1	Expression	GDSC	-	-	-	-	0.176562	1.91796e-07	0.134708	8.04109e-05
T0901317	lncRNA	MALAT1	Methylation	GDSC	-	-	-	-	0.105265	0.00418869	0.118025	0.00132673
TAK-715	lncRNA	MALAT1	CNV	GDSC	-	-	-	-	0.114179	0.00108837	0.135175	8.01545e-05
TAK-715	lncRNA	MALAT1	Expression	GDSC	-	-	-	-	0.100772	0.00330145	0.0893253	0.00829397
Tamoxifen	lncRNA	MALAT1	Expression	GDSC	-	-	-	-	0.116473	0.00119027	0.128298	0.000362841
Tanespimycin	lncRNA	MALAT1	Methylation	GDSC	-	-	-	-	-0.0879534	0.0171366	-0.0943067	0.00993842
Temozolomide	lncRNA	MALAT1	Expression	GDSC	-	-	-	-	0.143051	5.81956e-05	0.15073	2.59027e-05
Temozolomide	lncRNA	MALAT1	Methylation	GDSC	-	-	-	-	0.0803739	0.0381211	0.103935	0.00669668
Temsirolimus	lncRNA	MALAT1	Expression	GDSC	-	-	-	-	0.109855	0.00885347	-	-
THZ-2-102-1	lncRNA	MALAT1	CNV	GDSC	-	-	-	-	0.0861203	0.0153999	0.106859	0.00240905
THZ-2-102-1	lncRNA	MALAT1	Expression	GDSC	-	-	-	-	0.0880708	0.0168002	0.0985941	0.0059682
THZ-2-102-1	lncRNA	MALAT1	Methylation	GDSC	-	-	-	-	0.114312	0.00256063	0.144567	8.43382e-05
THZ-2-49	lncRNA	MALAT1	Expression	GDSC	-	-	-	-	0.139851	9.74182e-05	0.131458	0.0002725
THZ-2-49	lncRNA	MALAT1	Methylation	GDSC	-	-	-	-	0.118578	0.00182304	0.123079	0.00127214
Tivozanib	lncRNA	MALAT1	CNV	GDSC	-	-	-	-	0.134721	0.000129261	0.139294	4.49913e-05
Tivozanib	lncRNA	MALAT1	Expression	GDSC	-	-	-	-	0.192473	2.71036e-08	0.187694	5.71016e-08
Tivozanib	lncRNA	MALAT1	Methylation	GDSC	-	-	-	-	0.168274	2.60125e-06	0.164263	4.61483e-06
TKI258	lncRNA	MALAT1	CNV	CCLE	-	-	-	-	-	-	0.159587	0.0335714
TL-1-85	lncRNA	MALAT1	CNV	GDSC	-	-	-	-	0.145241	2.74253e-05	0.153526	1.13635e-05
TL-1-85	lncRNA	MALAT1	Expression	GDSC	-	-	-	-	0.170244	8.35495e-07	0.166095	2.12644e-06
TL-1-85	lncRNA	MALAT1	Methylation	GDSC	-	-	-	-	0.152755	1.76089e-05	0.156651	1.35529e-05
TL-2-105	lncRNA	MALAT1	CNV	GDSC	-	-	-	-	0.1169	0.00130505	0.137635	9.86401e-05
TL-2-105	lncRNA	MALAT1	Expression	GDSC	-	-	-	-	0.0944298	0.00661033	0.0828163	0.0167844
TL-2-105	lncRNA	MALAT1	Methylation	GDSC	-	-	-	-	0.204289	4.07373e-09	0.209656	1.83767e-09
TPCA-1	lncRNA	MALAT1	CNV	GDSC	-	-	-	-	0.11518	0.000936421	0.129153	0.00021091
TPCA-1	lncRNA	MALAT1	Expression	GDSC	-	-	-	-	0.147252	2.59548e-05	0.138109	8.49488e-05
TPCA-1	lncRNA	MALAT1	Methylation	GDSC	-	-	-	-	0.0792607	0.0376954	0.0933241	0.012919
Trametinib	lncRNA	MALAT1	CNV	GDSC	-	-	-	-	-	-	-0.0916319	0.0291894
Trametinib	lncRNA	MALAT1	Expression	CellMiner	-	-	-	-	-0.524695	0.00748912	-0.537324	0.00213217
Trametinib	lncRNA	MALAT1	Methylation	GDSC	-	-	-	-	-0.14532	6.57142e-05	-0.162387	6.2171e-06
Tretinoin	lncRNA	MALAT1	CNV	GDSC	-	-	-	-	0.11503	0.00196208	0.0982707	0.0110423
Tretinoin	lncRNA	MALAT1	Expression	GDSC	-	-	-	-	0.151279	3.61435e-05	0.127296	0.000792533
Tretinoin	lncRNA	MALAT1	Methylation	GDSC	-	-	-	-	0.10493	0.00623698	0.118775	0.00250179
Tubastatin A	lncRNA	MALAT1	CNV	GDSC	-	-	-	-	0.12358	0.000566298	0.123091	0.000537298
Tubastatin A	lncRNA	MALAT1	Expression	GDSC	-	-	-	-	0.150063	1.44964e-05	0.125908	0.000291756
Tubastatin A	lncRNA	MALAT1	Methylation	GDSC	-	-	-	-	0.11689	0.00136868	0.120905	0.00118047
Tyrothricin	lncRNA	MALAT1	Methylation	CellMiner	-	-	-	-	-	-	-0.374368	0.026809
UNC0638	lncRNA	MALAT1	Expression	GDSC	-	-	-	-	0.134536	0.000203368	0.147165	3.50693e-05
UNC0638	lncRNA	MALAT1	Methylation	GDSC	-	-	-	-	0.186007	1.63932e-07	0.180351	4.07147e-07
UNC1215	lncRNA	MALAT1	CNV	GDSC	-	-	-	-	0.0818302	0.0276552	0.0807026	0.0319982
UNC1215	lncRNA	MALAT1	Expression	GDSC	-	-	-	-	0.147681	2.66627e-05	0.144121	4.06167e-05
UNC1215	lncRNA	MALAT1	Methylation	GDSC	-	-	-	-	-	-	0.0918901	0.0185815
Veliparib	lncRNA	MALAT1	CNV	GDSC	-	-	-	-	0.090894	0.0145483	0.0877253	0.016169
Veliparib	lncRNA	MALAT1	Expression	GDSC	-	-	-	-	0.176543	8.80308e-07	0.163007	5.09558e-06
Vinblastine	lncRNA	MALAT1	CNV	GDSC	-	-	-	-	-	-	0.0894753	0.0121811
Vinblastine	lncRNA	MALAT1	Expression	GDSC	-	-	-	-	0.109808	0.0133513	0.107053	0.0155201
Vismodegib	lncRNA	MALAT1	CNV	GDSC	-	-	-	-	0.120935	0.000801461	0.138316	0.000138635
Vismodegib	lncRNA	MALAT1	Expression	GDSC	-	-	-	-	0.202636	8.11836e-09	0.195805	2.60699e-08
Vismodegib	lncRNA	MALAT1	Methylation	GDSC	-	-	-	-	0.121234	0.00168584	0.12588	0.00150402
VNLG/124	lncRNA	MALAT1	CNV	GDSC	-	-	-	-	0.105411	0.00482345	0.10651	0.00351588
VNLG/124	lncRNA	MALAT1	Expression	GDSC	-	-	-	-	0.149996	1.36344e-05	0.115647	0.00101207
VNLG/124	lncRNA	MALAT1	Methylation	GDSC	-	-	-	-	-	-	0.0972857	0.0123343
Vorinostat	lncRNA	MALAT1	CNV	GDSC	-	-	-	-	0.0986925	0.0069295	0.129159	0.000388509
Vorinostat	lncRNA	MALAT1	Expression	GDSC	-	-	-	-	0.178968	1.80017e-07	0.167808	8.92045e-07
Vorinostat	lncRNA	MALAT1	Methylation	GDSC	-	-	-	-	0.115121	0.00225511	0.148099	4.58442e-05
VX-11e	lncRNA	MALAT1	CNV	GDSC	-	-	-	-	-	-	0.0777835	0.0333655
VX-11e	lncRNA	MALAT1	Expression	GDSC	-	-	-	-	0.093741	0.0162487	0.102266	0.00614458
VX-702	lncRNA	MALAT1	CNV	GDSC	-	-	-	-	0.1518	1.64822e-05	0.161851	3.57101e-06
VX-702	lncRNA	MALAT1	Expression	GDSC	-	-	-	-	0.161927	4.65432e-06	0.150202	2.09726e-05
VX-702	lncRNA	MALAT1	Methylation	GDSC	-	-	-	-	0.0963492	0.0135886	0.109327	0.00413122
WZ3105	lncRNA	MALAT1	Expression	GDSC	-	-	-	-	0.0793474	0.0284711	0.0717364	0.0436596
WZ3105	lncRNA	MALAT1	Methylation	GDSC	-	-	-	-	-	-	0.0849206	0.0247851
XAV939	lncRNA	MALAT1	Methylation	GDSC	-	-	-	-	-0.128424	0.00359266	-0.113602	0.0128585
XMD13-2	lncRNA	MALAT1	CNV	GDSC	-	-	-	-	0.0982679	0.00545206	0.106977	0.00246527
XMD13-2	lncRNA	MALAT1	Expression	GDSC	-	-	-	-	0.118692	0.000716522	0.100563	0.00397884
XMD13-2	lncRNA	MALAT1	Methylation	GDSC	-	-	-	-	0.121848	0.000804298	0.127323	0.000579997
XMD14-99	lncRNA	MALAT1	CNV	GDSC	-	-	-	-	0.11977	0.00064749	0.136269	7.7735e-05
XMD14-99	lncRNA	MALAT1	Expression	GDSC	-	-	-	-	0.162037	2.37718e-06	0.159016	4.3262e-06
XMD14-99	lncRNA	MALAT1	Methylation	GDSC	-	-	-	-	0.141007	7.87702e-05	0.13458	0.000211902
XMD15-27	lncRNA	MALAT1	CNV	GDSC	-	-	-	-	0.108051	0.00248528	0.109067	0.0019875
XMD15-27	lncRNA	MALAT1	Expression	GDSC	-	-	-	-	0.145483	3.37157e-05	0.141202	7.0089e-05
XMD15-27	lncRNA	MALAT1	Methylation	GDSC	-	-	-	-	0.112282	0.00250205	0.118568	0.00167603
Y-39983	lncRNA	MALAT1	CNV	GDSC	-	-	-	-	0.120097	0.0007845	0.119866	0.000754019
Y-39983	lncRNA	MALAT1	Expression	GDSC	-	-	-	-	0.164747	2.23718e-06	0.144169	5.09577e-05
Y-39983	lncRNA	MALAT1	Methylation	GDSC	-	-	-	-	0.112911	0.00231539	0.11285	0.0028949
YM201636	lncRNA	MALAT1	CNV	GDSC	-	-	-	-	0.144237	4.32699e-05	0.154504	9.28443e-06
YM201636	lncRNA	MALAT1	Expression	GDSC	-	-	-	-	0.120816	0.000622175	0.120108	0.000694126
YM201636	lncRNA	MALAT1	Methylation	GDSC	-	-	-	-	0.167516	4.28147e-06	0.168146	3.80658e-06
Zibotentan	lncRNA	MALAT1	CNV	GDSC	-	-	-	-	0.0846156	0.0273956	0.09873	0.00780974
Zibotentan	lncRNA	MALAT1	Expression	GDSC	-	-	-	-	0.20862	7.53748e-10	0.191675	2.43965e-08
Zibotentan	lncRNA	MALAT1	Methylation	GDSC	-	-	-	-	0.115648	0.00181104	0.115171	0.00222644
ZSTK474	lncRNA	MALAT1	Expression	GDSC	-	-	-	-	0.092646	0.00976859	-	-
